# Supplementary material for: The Mechanisms Underlying α-Amanitin Resistance in Drosophila melanogaster: A Microarray Analysis
Source: PLoS One. 2014 Apr 2;9(4):e93489. doi: 10.1371/journal.pone.0093489 (PMC3973583; doi:10.1371/journal.pone.0093489)
Supplement: Table S1 — Differentially expressed genes (DEGs) between Ama-KTT/M/2 on no toxin versus Canton-S (group 2 versus 1), Ama-KTT/M/2 on toxin versus Canton-S (group 3 versus 1), and Ama-KTT/M/2 on toxin versus Ama-KTT/M/2 on no toxin (group 3 versus 2). This table contains 4209 DEGs that are differentially expressed in at least one of the three comparisons. (XLSX) [file pone.0093489.s001.xlsx]

## Sheet: Original
Table S1. Differentially expressed genes (DEGs) from three comparisons. These DEGs were identified by Rank Product method with threshold of corrected p-value ≤ 0.05
Comparison 1	ProbeID	Gene Symbol	Ensembl	Group 1 AVG	Group 2 AVG	Fold Change (FC)	RP_corrected p-values	Rank_RP	DEG	Comparison 2	Probe	Group 1 AVG2	Group 3 AVG	Fold Change (FC)2	RP_corrected p-value	Rank RP	DEG	Comparison 3	Probe2	Group 2 AVG2	Group 3 AVG2	Fold Change (FC)	RP_corrected p-values	Rank_RP	DEG	Probe	Gene Symbol	Gene Title	Alignments	Gene Ontology Biological Process	Gene Ontology Cellular Component	Gene Ontology Molecular Function
Group 2 vs 1	1631053_at	Sgs7	FBgn0003377	5787.89	0.005504	-1.05158e+06	0	1	DEG	Group 3 vs 1	1631053_at	5787.89	9290.29	1.60513	0	370	DEG	Group 3 vs 2	1631053_at	0.005504	9290.29	1.68792e+06	0	1	DEG	1631053_at	Sgs7	group III	chr3L:11502960-11503347 (+) // 100.0 //	0007594 // puparial adhesion // traceable author statement	0005576 // extracellular region // traceable author statement	0005198 // structural molecule activity // traceable author statement
Group 2 vs 1	1641234_at	CG16997	FBgn0032413	852.524	0.00219	-389281	0	2	DEG	Group 3 vs 1	1641234_at	852.524	0.00171	-498552	0	1	DEG	Group 3 vs 2	1641234_at	0.00219	0.00171	-1.2807			nonDEG	1641234_at	CG16997	---	chr2L:12111123-12111945 (+) // 100.0 //	0006508 // proteolysis // inferred from electronic annotation /// 0006508 // proteolysis // non-traceable author statement	---	0003824 // catalytic activity // inferred from electronic annotation /// 0004252 // serine-type endopeptidase activity // inferred from electronic annotation /// 0016787 // hydrolase activity // inferred from electronic annotation
Group 2 vs 1	1637144_a_at	Map205	FBgn0002645	0.486774	1906.48	3916.56	0	3	DEG	Group 3 vs 1	1637144_a_at	0.486774	2195.1	4509.49	0	2	DEG	Group 3 vs 2	1637144_a_at	1906.48	2195.1	1.15139	0.000945991		nonDEG	1637144_a_at	Map205	Microtubule-associated protein 205	chr3R:27882313-27894162 (-) // 100.0 //	0007017 // microtubule-based process // inferred from sequence or structural similarity /// 0007017 // microtubule-based process // non-traceable author statement	0005737 // cytoplasm // inferred from electronic annotation /// 0005874 // microtubule // inferred from electronic annotation /// 0005875 // microtubule associated complex // inferred from direct assay /// 0005875 // microtubule associated complex // inferred from sequence or structural similarity /// 0005876 // spindle microtubule // non-traceable author statement /// 0005881 // cytoplasmic micr…	0008017 // microtubule binding // inferred from sequence or structural similarity /// 0008017 // microtubule binding // non-traceable author statement
Group 2 vs 1	1639249_at	CG7587	FBgn0038523	988.658	0.322966	-3061.18	0	4	DEG	Group 3 vs 1	1639249_at	988.658	4061.69	4.10829	0	120	DEG	Group 3 vs 2	1639249_at	0.322966	4061.69	12576.2	0	4	DEG	1639249_at	CG7587	---	chr3R:13420144-13420695 (+) // 100.0 //	---	---	---
Group 2 vs 1	1624308_at	Sgs3	FBgn0003373	3911.23	1.77423	-2204.47	0	5	DEG	Group 3 vs 1	1624308_at	3911.23	9347.6	2.38994	0	212	DEG	Group 3 vs 2	1624308_at	1.77423	9347.6	5268.55	0	5	DEG	1624308_at	Sgs3	salivary gland glue protein 3	chr3L:11505320-11506503 (+) // 100.0 //	0007594 // puparial adhesion // traceable author statement	0005576 // extracellular region // non-traceable author statement /// 0005576 // extracellular region // traceable author statement /// 0005576 // extracellular region // inferred from electronic annotation	0005198 // structural molecule activity // traceable author statement
Group 2 vs 1	1638264_at	CG1304	FBgn0031141	0.734576	1460.42	1988.11	0	6	DEG	Group 3 vs 1	1638264_at	0.734576	1997.55	2719.32	0	3	DEG	Group 3 vs 2	1638264_at	1460.42	1997.55	1.36779	0	550	DEG<1.5/-1.96	1638264_at	CG1304	---	chrX:20835547-20836443 (-) // 100.0 //	0006508 // proteolysis // inferred from electronic annotation /// 0006508 // proteolysis // non-traceable author statement	---	0003824 // catalytic activity // inferred from electronic annotation /// 0004252 // serine-type endopeptidase activity // inferred from electronic annotation /// 0004252 // serine-type endopeptidase activity // non-traceable author statement
Group 2 vs 1	1625987_at	Eig71Ee	FBgn0004592	1334.75	0.942224	-1416.59	0	7	DEG	Group 3 vs 1	1625987_at	1334.75	2091.91	1.56727	0.00109488	709	DEG	Group 3 vs 2	1625987_at	0.942224	2091.91	2220.18	0	9	DEG	1625987_at	Eig71Ee	Gene VII	chr3L:15647695-15649106 (-) // 100.0 //	0007594 // puparial adhesion // traceable author statement /// 0042381 // hemolymph coagulation // inferred from direct assay	0005576 // extracellular region // inferred by curator	0005198 // structural molecule activity // traceable author statement /// 0005515 // protein binding // inferred from physical interaction
Group 2 vs 1	1626401_at	Cyp6a2	FBgn0000473	4.54866	5702.3	1253.62	0	8	DEG	Group 3 vs 1	1626401_at	4.54866	3270.14	718.925	0	4	DEG	Group 3 vs 2	1626401_at	5702.3	3270.14	-1.74375	0	329	DEG	1626401_at	Cyp6a2	cytochrome P450-B1	chr2R:2667219-2668960 (-) // 100.0 //	0017085 // response to insecticide // inferred from direct assay /// 0031000 // response to caffeine // inferred from direct assay /// 0055114 // oxidation reduction // inferred from electronic annotation	0005783 // endoplasmic reticulum // inferred from electronic annotation /// 0005789 // endoplasmic reticulum membrane // inferred from electronic annotation /// 0005792 // microsome // non-traceable author statement /// 0005792 // microsome // inferred from electronic annotation /// 0016020 // membrane // non-traceable author statement /// 0016020 // membrane // inferred from electronic annotation	0004497 // monooxygenase activity // inferred from electronic annotation /// 0005506 // iron ion binding // inferred from electronic annotation /// 0009055 // electron carrier activity // inferred from electronic annotation /// 0009055 // electron carrier activity // inferred from sequence or structural similarity /// 0009055 // electron carrier activity // non-traceable author statement /// 0016…
Group 2 vs 1	1634997_at	Sgs5	FBgn0003375	1573.72	1.53407	-1025.85	0	9	DEG	Group 3 vs 1	1634997_at	1573.72	5321.4	3.3814	0	147	DEG	Group 3 vs 2	1634997_at	1.53407	5321.4	3468.8	0	7	DEG	1634997_at	Sgs5	Salivary gland secretion 5	chr3R:13421111-13421766 (+) // 100.0 //	0007594 // puparial adhesion // traceable author statement	0005576 // extracellular region // traceable author statement	0005198 // structural molecule activity // traceable author statement
Group 2 vs 1	1638108_at	Sgs8	FBgn0003378	2808.76	3.38888	-828.817	0	10	DEG	Group 3 vs 1	1638108_at	2808.76	4618.13	1.64419	0	358	DEG	Group 3 vs 2	1638108_at	3.38888	4618.13	1362.73	0	11	DEG	1638108_at	Sgs8	group II	chr3L:11502066-11502494 (-) // 100.0 //	0007594 // puparial adhesion // traceable author statement	0005576 // extracellular region // traceable author statement	0005198 // structural molecule activity // traceable author statement
Group 2 vs 1	1640035_at	Fbp2	FBgn0000640	9071.29	12.1813	-744.692	0	11	DEG	Group 3 vs 1	1640035_at	9071.29	6487.07	-1.39836	0	477	DEG_FC<1.5/-1.73	Group 3 vs 2	1640035_at	12.1813	6487.07	532.545	0	13	DEG	1640035_at	Fbp2	fat body protein P6	chr2L:9426871-9427836 (+) // 100.0 //	0008152 // metabolic process // inferred from electronic annotation /// 0055114 // oxidation reduction // inferred from electronic annotation	0005811 // lipid particle // inferred from direct assay	0003824 // catalytic activity // inferred from electronic annotation /// 0004022 // alcohol dehydrogenase activity // inferred from electronic annotation /// 0005488 // binding // inferred from electronic annotation /// 0005515 // protein binding // inferred from physical interaction /// 0016491 // oxidoreductase activity // inferred from electronic annotation /// 0045735 // nutrient reservoir ac…
Group 2 vs 1	1634525_at	CG34227	FBgn0085256	5389.56	7.54353	-714.461	0	12	DEG	Group 3 vs 1	1634525_at	5389.56	3046.47	-1.76912	0	314	DEG	Group 3 vs 2	1634525_at	7.54353	3046.47	403.852	0	14	DEG	1634525_at	CG34227	---	chr2R:7135627-7136119 (+) // 100.0 //	---	0005615 // extracellular space // inferred from direct assay	---
Group 2 vs 1	1624081_at	---	FBgn0040559	561.147	1.02479	-547.573	0	13	DEG	Group 3 vs 1	1624081_at	561.147	617.576	1.10056	0.0498026		nonDEG	Group 3 vs 2	1624081_at	1.02479	617.576	602.637	0	12	DEG	1624081_at	---	---	chr3R:9977928-9978289 (+) // 100.0 //	---	---	0005515 // protein binding // inferred from physical interaction
Group 2 vs 1	1637857_at	lectin-24A	FBgn0040104	1.83926	822.794	447.35	0	14	DEG	Group 3 vs 1	1637857_at	1.83926	514.397	279.676	0	9	DEG	Group 3 vs 2	1637857_at	822.794	514.397	-1.59953	0.00476117	1244	DEG	1637857_at	lectin-24A	Lectin24A	chr2L:3716879-3717728 (-) // 100.0 //	---	---	0005488 // binding // inferred from electronic annotation /// 0005534 // galactose binding // inferred from sequence or structural similarity
Group 2 vs 1	1637846_at	CG7606	---	1544.33	4.39848	-351.105	0	15	DEG	Group 3 vs 1	1637846_at	1544.33	191.647	-8.05819	0	71	DEG	Group 3 vs 2	1637846_at	4.39848	191.647	43.5712	0.00598055	1324	DEG	1637846_at	CG7606	---	chr3R:13422272-13422648 (+) // 100.0 //	---	---	---
Group 2 vs 1	1625552_at	CG14820	FBgn0035718	961.684	3.36488	-285.8	0	16	DEG	Group 3 vs 1	1625552_at	961.684	1.50432	-639.282	0	5	DEG	Group 3 vs 2	1625552_at	3.36488	1.50432	-2.23681			nonDEG	1625552_at	CG14820	---	chr3L:6926029-6927939 (+) // 100.0 //	0006508 // proteolysis // inferred from electronic annotation	---	0004180 // carboxypeptidase activity // inferred from electronic annotation /// 0004181 // metallocarboxypeptidase activity // inferred from sequence or structural similarity /// 0005515 // protein binding // inferred from physical interaction /// 0008270 // zinc ion binding // inferred from electronic annotation /// 0016787 // hydrolase activity // inferred from electronic annotation
Group 2 vs 1	1639069_at	Cyp12d1-d	FBgn0053503	5.57854	1562.64	280.116	0	17	DEG	Group 3 vs 1	1639069_at	5.57854	2580.64	462.601	0	7	DEG	Group 3 vs 2	1639069_at	1562.64	2580.64	1.65146	0	367	DEG	1639069_at	Cyp12d1-d	Cyp12d1-d	chrUextra:247054-248892 (+) // 93.31 // /// chr2R:7011158-7013115 (-) // 100.0 // /// chr2R:7007473-7009349 (-) // 95.28 //	0055114 // oxidation reduction // inferred from electronic annotation /// 0055114 // oxidation reduction // inferred from sequence or structural similarity	0005739 // mitochondrion // inferred from sequence or structural similarity /// 0005739 // mitochondrion // inferred from electronic annotation /// 0016020 // membrane // inferred from electronic annotation /// 0031966 // mitochondrial membrane // inferred from electronic annotation	0004497 // monooxygenase activity // inferred from electronic annotation /// 0005506 // iron ion binding // inferred from electronic annotation /// 0009055 // electron carrier activity // inferred from electronic annotation /// 0009055 // electron carrier activity // inferred from sequence or structural similarity /// 0009055 // electron carrier activity // non-traceable author statement /// 0016…
Group 2 vs 1	1633401_s_at	Cyp12d1-d /// Cyp12d1-p	FBgn0050489 /// FBgn0053503	9.11571	1798.53	197.3	0	18	DEG	Group 3 vs 1	1633401_s_at	9.11571	3241.24	355.566	0	8	DEG	Group 3 vs 2	1633401_s_at	1798.53	3241.24	1.80216	0	311	DEG	1633401_s_at	Cyp12d1-d /// Cyp12d1-p	Cyp12d1-d /// Cyp12d1-p	chrUextra:247021-248794 (+) // 99.81 // /// chr2R:7007609-7009382 (-) // 100.0 // /// chr2R:7011375-7013148 (-) // 99.81 //	0055114 // oxidation reduction // inferred from electronic annotation /// 0055114 // oxidation reduction // inferred from sequence or structural similarity	0005739 // mitochondrion // inferred from sequence or structural similarity /// 0005739 // mitochondrion // non-traceable author statement /// 0005739 // mitochondrion // inferred from electronic annotation /// 0016020 // membrane // inferred from electronic annotation /// 0031966 // mitochondrial membrane // inferred from electronic annotation	0004497 // monooxygenase activity // inferred from electronic annotation /// 0005506 // iron ion binding // inferred from electronic annotation /// 0009055 // electron carrier activity // inferred from sequence or structural similarity /// 0009055 // electron carrier activity // non-traceable author statement /// 0009055 // electron carrier activity // inferred from electronic annotation /// 0016…
Group 2 vs 1	1628052_at	Cyp6a17	FBgn0015714	6925.2	37.08	-186.764	0	19	DEG	Group 3 vs 1	1628052_at	6925.2	38.8952	-178.048	0	11	DEG	Group 3 vs 2	1628052_at	37.08	38.8952	1.04895			nonDEG	1628052_at	Cyp6a17	Cyp6a17	chr2R:10761476-10763064 (+) // 100.0 //	0055114 // oxidation reduction // inferred from electronic annotation	0005783 // endoplasmic reticulum // inferred from electronic annotation /// 0005789 // endoplasmic reticulum membrane // inferred from electronic annotation /// 0005792 // microsome // non-traceable author statement /// 0005792 // microsome // inferred from electronic annotation /// 0016020 // membrane // non-traceable author statement /// 0016020 // membrane // inferred from electronic annotation	0004497 // monooxygenase activity // inferred from electronic annotation /// 0005506 // iron ion binding // inferred from electronic annotation /// 0009055 // electron carrier activity // inferred from electronic annotation /// 0009055 // electron carrier activity // inferred from sequence or structural similarity /// 0009055 // electron carrier activity // non-traceable author statement /// 0016…
Group 2 vs 1	1630473_at	TwdlM	FBgn0039434	129.044	20532.5	159.112	0	20	DEG	Group 3 vs 1	1630473_at	129.044	571.062	4.42532	0.079005		nonDEG	Group 3 vs 2	1630473_at	20532.5	571.062	-35.9549	0	21	DEG	1630473_at	TwdlM	CG5468	chr3R:22444844-22445953 (+) // 100.0 //	---	---	0005515 // protein binding // inferred from physical interaction
Group 2 vs 1	1632192_at	CG14564	FBgn0037131	73.013	10949.3	149.964	0	21	DEG	Group 3 vs 1	1632192_at	73.013	1525.69	20.8961	0.122727		nonDEG	Group 3 vs 2	1632192_at	10949.3	1525.69	-7.17666	0	48	DEG	1632192_at	CG14564	---	chr3L:21750256-21751081 (+) // 100.0 //	---	---	---
Group 2 vs 1	1632595_at	CG32237	FBgn0052237	54.9542	8155.18	148.4	0	22	DEG	Group 3 vs 1	1632595_at	54.9542	1746.38	31.7789	0.00418324	876	DEG	Group 3 vs 2	1632595_at	8155.18	1746.38	-4.66976	0	75	DEG	1632595_at	CG32237	---	chr3L:4849434-4852455 (-) // 100.0 //	---	---	---
Group 2 vs 1	1632444_at	CG15170	FBgn0032733	513.497	3.62497	-141.656	0	23	DEG	Group 3 vs 1	1632444_at	513.497	6.8604	-74.8494	0	19	DEG	Group 3 vs 2	1632444_at	3.62497	6.8604	1.89254			nonDEG	1632444_at	CG15170	---	chr2L:18988293-18990227 (-) // 100.0 //	---	---	---
Group 2 vs 1	1636492_at	---	FBgn0050029 /// FBgn0085255	4393.02	34.176	-128.541	0	24	DEG	Group 3 vs 1	1636492_at	4393.02	462.612	-9.49614	0	59	DEG	Group 3 vs 2	1636492_at	34.176	462.612	13.5362	0	37	DEG	1636492_at	---	---	chr2R:7133621-7134161 (+) // 100.0 //	---	---	---
Group 2 vs 1	1633471_at	Prx2540-2	FBgn0033518	5163.5	44.5692	-115.854	0	25	DEG	Group 3 vs 1	1633471_at	5163.5	72.3991	-71.3199	0	20	DEG	Group 3 vs 2	1633471_at	44.5692	72.3991	1.62442	0.146457		nonDEG	1633471_at	Prx2540-2	peroxiredoxin 2540	chr2R:6306222-6307278 (+) // 100.0 // /// chr2R:6311940-6312556 (+) // 61.75 // /// chr2R:6314477-6315420 (-) // 83.99 //	0055114 // oxidation reduction // inferred from electronic annotation	---	0004601 // peroxidase activity // inferred from sequence or structural similarity /// 0004601 // peroxidase activity // non-traceable author statement /// 0004601 // peroxidase activity // inferred from electronic annotation /// 0004602 // glutathione peroxidase activity // inferred from sequence or structural similarity /// 0004602 // glutathione peroxidase activity // inferred from electronic a…
Group 2 vs 1	1625572_s_at	Dbi	FBgn0010387	69.2266	7819.76	112.959	0	26	DEG	Group 3 vs 1	1625572_s_at	69.2266	7975.58	115.21	0	17	DEG	Group 3 vs 2	1625572_s_at	7819.76	7975.58	1.01993	0.012174		nonDEG	1625572_s_at	Dbi	diazepam binding inhibitor	chr3L:7124970-7126563 (+) // 99.04 //	0006810 // transport // inferred from electronic annotation /// 0042049 // cellular acyl-CoA homeostasis // inferred from sequence or structural similarity /// 0042049 // cellular acyl-CoA homeostasis // non-traceable author statement	---	0000062 // acyl-CoA binding // inferred from sequence or structural similarity /// 0000062 // acyl-CoA binding // non-traceable author statement /// 0000062 // acyl-CoA binding // traceable author statement /// 0000062 // acyl-CoA binding // inferred from electronic annotation /// 0004857 // enzyme inhibitor activity // inferred from sequence or structural similarity /// 0005488 // binding // inf…
Group 2 vs 1	1641174_at	RFeSP	FBgn0021906	1829.99	19.4656	-94.0115	0	27	DEG	Group 3 vs 1	1641174_at	1829.99	14.8517	-123.218	0	13	DEG	Group 3 vs 2	1641174_at	19.4656	14.8517	-1.31067			nonDEG	1641174_at	RFeSP	Rieske iron-sulfur protein	chr2L:1612685-1614182 (-) // 100.0 //	0006122 // mitochondrial electron transport, ubiquinol to cytochrome c // inferred from sequence or structural similarity /// 0055114 // oxidation reduction // inferred from electronic annotation	0005750 // mitochondrial respiratory chain complex III // inferred from sequence or structural similarity /// 0016020 // membrane // inferred from electronic annotation	0008121 // ubiquinol-cytochrome-c reductase activity // inferred from sequence or structural similarity /// 0008121 // ubiquinol-cytochrome-c reductase activity // inferred from electronic annotation /// 0009055 // electron carrier activity // inferred from electronic annotation /// 0016491 // oxidoreductase activity // inferred from electronic annotation
Group 2 vs 1	1624964_at	CG17105	FBgn0032280	4311.64	48.2481	-89.364	0	28	DEG	Group 3 vs 1	1624964_at	4311.64	7329.7	1.69998	0	338	DEG	Group 3 vs 2	1624964_at	48.2481	7329.7	151.917	0	17	DEG	1624964_at	CG17105	---	chr2L:10681046-10681358 (+) // 100.0 //	---	---	---
Group 2 vs 1	1630307_at	Cpr64Ad	FBgn0035513	39.8933	3501.86	87.7806	0	29	DEG	Group 3 vs 1	1630307_at	39.8933	455.852	11.4268	0.00928104	995	DEG	Group 3 vs 2	1630307_at	3501.86	455.852	-7.68202	0	45	DEG	1630307_at	Cpr64Ad	CG1259	chr3L:4215383-4216414 (+) // 99.58 //	---	0005811 // lipid particle // inferred from direct assay	0005214 // structural constituent of chitin-based cuticle // inferred from sequence or structural similarity /// 0005515 // protein binding // inferred from physical interaction /// 0008010 // structural constituent of chitin-based larval cuticle // inferred from sequence or structural similarity /// 0042302 // structural constituent of cuticle // inferred from electronic annotation
Group 2 vs 1	1627607_at	CG4229	FBgn0036639	61.3123	5014.1	81.7797	0	30	DEG	Group 3 vs 1	1627607_at	61.3123	1056.14	17.2256	0.0139391	1064	DEG	Group 3 vs 2	1627607_at	5014.1	1056.14	-4.74756	0	72	DEG	1627607_at	CG4229	---	chr3L:16549942-16551058 (+) // 99.46 //	---	---	0005515 // protein binding // inferred from physical interaction
Group 2 vs 1	1635512_at	CG11893	FBgn0039316	13.1365	1061.08	80.7732	0	31	DEG	Group 3 vs 1	1635512_at	13.1365	436.737	33.2462	0	28	DEG	Group 3 vs 2	1635512_at	1061.08	436.737	-2.42955	0	173	DEG	1635512_at	CG11893	---	chr3R:21115598-21116962 (+) // 100.0 //	---	---	0005515 // protein binding // inferred from physical interaction
Group 2 vs 1	1639457_at	CG32284	FBgn0052284	3450.15	43.636	-79.0667	0	32	DEG	Group 3 vs 1	1639457_at	3450.15	67.1847	-51.3532	0	21	DEG	Group 3 vs 2	1639457_at	43.636	67.1847	1.53966	0.174488		nonDEG	1639457_at	CG32284	---	chr3L:3186663-3187249 (+) // 100.0 //	0006030 // chitin metabolic process // inferred from electronic annotation	0005576 // extracellular region // inferred from electronic annotation	0008061 // chitin binding // inferred from electronic annotation
Group 2 vs 1	1633293_at	CG10157	FBgn0039099	34.9829	2330.25	66.611	0	33	DEG	Group 3 vs 1	1633293_at	34.9829	4116.68	117.677	0	15	DEG	Group 3 vs 2	1633293_at	2330.25	4116.68	1.76663	0	323	DEG	1633293_at	CG10157	---	chr3R:19504612-19505604 (+) // 100.0 //	---	---	0005515 // protein binding // inferred from physical interaction
Group 2 vs 1	1631354_x_at	CG13679	FBgn0035856	42.5971	2809.38	65.9524	0	34	DEG	Group 3 vs 1	1631354_x_at	42.5971	588.595	13.8177	0.00924732	994	DEG	Group 3 vs 2	1631354_x_at	2809.38	588.595	-4.77303	0	71	DEG	1631354_x_at	CG13679	---	chr3L:8195893-8196446 (+) // 100.0 //	---	---	---
Group 2 vs 1	1635549_at	TotA	FBgn0028396	3198.78	52.6378	-60.7696	0	35	DEG	Group 3 vs 1	1635549_at	3198.78	518.384	-6.17067	0	80	DEG	Group 3 vs 2	1635549_at	52.6378	518.384	9.84814	0	40	DEG	1635549_at	TotA	Turandot A	chr3R:16696757-16697427 (+) // 100.0 //	0006950 // response to stress // inferred from mutant phenotype /// 0009408 // response to heat // traceable author statement	---	---
Group 2 vs 1	1624216_at	Ccp84Ae	FBgn0004779	75.6927	4539.02	59.9664	0	36	DEG	Group 3 vs 1	1624216_at	75.6927	266.394	3.51941	0.0490588	1353	DEG	Group 3 vs 2	1624216_at	4539.02	266.394	-17.0388	0	31	DEG	1624216_at	Ccp84Ae	cuticle cluster 4	chr3R:2516611-2517480 (-) // 100.0 //	---	---	0005214 // structural constituent of chitin-based cuticle // inferred from sequence or structural similarity /// 0008010 // structural constituent of chitin-based larval cuticle // inferred from sequence or structural similarity /// 0042302 // structural constituent of cuticle // inferred from electronic annotation
Group 2 vs 1	1638648_at	CG8160	FBgn0034011	1991.73	33.8793	-58.789	0	37	DEG	Group 3 vs 1	1638648_at	1991.73	16.7756	-118.728	0	14	DEG	Group 3 vs 2	1638648_at	33.8793	16.7756	-2.01956			nonDEG	1638648_at	CG8160	---	chr2R:11214637-11215770 (-) // 100.0 //	---	---	---
Group 2 vs 1	1631414_at	CG11313	FBgn0039798	1403.94	24.6031	-57.0635	0	38	DEG	Group 3 vs 1	1631414_at	1403.94	127.032	-11.0518	0	52	DEG	Group 3 vs 2	1631414_at	24.6031	127.032	5.16328	0.0252066	2085	DEG	1631414_at	CG11313	---	chr3R:26555648-26556868 (-) // 100.0 //	0006508 // proteolysis // inferred from electronic annotation /// 0006508 // proteolysis // non-traceable author statement	---	0003824 // catalytic activity // inferred from electronic annotation /// 0004252 // serine-type endopeptidase activity // inferred from electronic annotation /// 0008233 // peptidase activity // inferred from electronic annotation /// 0016787 // hydrolase activity // inferred from electronic annotation
Group 2 vs 1	1637465_at	CG31157	FBgn0051157	32.5586	1801.11	55.319	0	39	DEG	Group 3 vs 1	1637465_at	32.5586	1654.94	50.8296	0	22	DEG	Group 3 vs 2	1637465_at	1801.11	1654.94	-1.08832	0.0271679		nonDEG	1637465_at	CG31157	---	chr3R:8873388-8875035 (+) // 100.0 //	---	---	---
Group 2 vs 1	1627007_at	CG4306	FBgn0036787	1279.12	25.3752	-50.4083	0	40	DEG	Group 3 vs 1	1627007_at	1279.12	411.348	-3.10959	0	160	DEG	Group 3 vs 2	1627007_at	25.3752	411.348	16.2106	0	32	DEG	1627007_at	CG4306	---	chr3L:18455053-18456257 (-) // 100.0 //	---	---	0005515 // protein binding // inferred from physical interaction
Group 2 vs 1	1633147_at	CG10659 /// DsimCG10659	FBgn0032839	55.1858	2603.13	47.1703	0	41	DEG	Group 3 vs 1	1633147_at	55.1858	2239.61	40.5831	0	24	DEG	Group 3 vs 2	1633147_at	2603.13	2239.61	-1.16231	0.00658211		nonDEG	1633147_at	CG10659 /// DsimCG10659	--- /// ---	chr2L:20025112-20025781 (-) // 100.0 //	---	---	---
Group 2 vs 1	1623467_at	CG8087	FBgn0038241	1459.94	31.0155	-47.0715	0	42	DEG	Group 3 vs 1	1623467_at	1459.94	92.2091	-15.833	0	45	DEG	Group 3 vs 2	1623467_at	31.0155	92.2091	2.973	0.0828573		nonDEG	1623467_at	CG8087	---	chr3R:10390043-10390504 (-) // 100.0 //	---	---	---
Group 2 vs 1	1626028_at	CG4783	FBgn0038756	1039.12	22.2687	-46.6628	0	43	DEG	Group 3 vs 1	1626028_at	1039.12	44.4882	-23.3572	0	37	DEG	Group 3 vs 2	1626028_at	22.2687	44.4882	1.99779	0.146404		nonDEG	1626028_at	CG4783	---	chr3R:15774191-15774631 (+) // 100.0 //	---	---	---
Group 2 vs 1	1641634_at	Lsp2	FBgn0002565	12039	260.426	-46.2282	0	44	DEG	Group 3 vs 1	1641634_at	12039	11482.5	-1.04846	0.00100995		nonDEG	Group 3 vs 2	1641634_at	260.426	11482.5	44.0914	0	20	DEG	1641634_at	Lsp2	Larval serum protein-2	chr3L:12122492-12124796 (+) // 100.0 //	0006810 // transport // inferred from electronic annotation	0005576 // extracellular region // non-traceable author statement /// 0005576 // extracellular region // inferred from electronic annotation /// 0005616 // larval serum protein complex // inferred from direct assay /// 0005811 // lipid particle // inferred from direct assay	0005344 // oxygen transporter activity // inferred from electronic annotation /// 0005515 // protein binding // inferred from physical interaction /// 0045735 // nutrient reservoir activity // non-traceable author statement /// 0045735 // nutrient reservoir activity // inferred from electronic annotation
Group 2 vs 1	1638488_at	CG34278	FBgn0085307	56.8541	2622.36	46.1244	0	45	DEG	Group 3 vs 1	1638488_at	56.8541	1665.19	29.2889	0	32	DEG	Group 3 vs 2	1638488_at	2622.36	1665.19	-1.57481	0	408	DEG	1638488_at	CG34278	---	chr3R:12946200-12946477 (+) // 100.0 //	---	---	---
Group 2 vs 1	1629230_at	dro2	---	2637.83	61.2856	-43.0415	0	46	DEG	Group 3 vs 1	1629230_at	2637.83	5.00187	-527.368	0	6	DEG	Group 3 vs 2	1629230_at	61.2856	5.00187	-12.2525	0.0676168		nonDEG	1629230_at	dro2	drosomycin-D	chr3L:3314266-3314587 (+) // 100.0 //	0006952 // defense response // non-traceable author statement /// 0006952 // defense response // inferred from electronic annotation /// 0050832 // defense response to fungus // inferred from direct assay	0005576 // extracellular region // inferred from electronic annotation	0008200 // ion channel inhibitor activity // inferred from electronic annotation
Group 2 vs 1	1623815_at	CG8100	FBgn0036410	544.89	13.7874	-39.521	0	47	DEG	Group 3 vs 1	1623815_at	544.89	205.853	-2.64699	0.00143621	738	DEG	Group 3 vs 2	1623815_at	13.7874	205.853	14.9306	0.00248135	1033	DEG	1623815_at	CG8100	---	chr3L:14076730-14078834 (+) // 100.0 //	0006810 // transport // inferred from electronic annotation	0005576 // extracellular region // inferred from sequence or structural similarity /// 0005616 // larval serum protein complex // inferred from sequence or structural similarity	0005344 // oxygen transporter activity // inferred from electronic annotation
Group 2 vs 1	1628963_at	CG4716 /// DsimGD10957	FBgn0033820	1291.46	32.994	-39.1423	0	48	DEG	Group 3 vs 1	1628963_at	1291.46	12.1922	-105.926	0	18	DEG	Group 3 vs 2	1628963_at	32.994	12.1922	-2.70617	0.203009		nonDEG	1628963_at	CG4716 /// DsimGD10957	--- /// CG4716	chr2R:9144087-9144951 (+) // 100.0 //	0055114 // oxidation reduction // inferred from electronic annotation	---	0004486 // methylenetetrahydrofolate dehydrogenase activity // non-traceable author statement /// 0016491 // oxidoreductase activity // inferred from electronic annotation
Group 2 vs 1	1627950_at	CG14237	FBgn0039428	68.454	2265.83	33.1001	0	49	DEG	Group 3 vs 1	1627950_at	68.454	1565.25	22.8657	0	38	DEG	Group 3 vs 2	1627950_at	2265.83	1565.25	-1.44759	0.00126579	904	DEG<1.5/-1.91	1627950_at	CG14237	---	chr3R:22281857-22282964 (+) // 100.0 //	---	---	---
Group 2 vs 1	1624688_at	CG9360 /// DsimCG9360	FBgn0030332	107.133	3453.48	32.2354	0	50	DEG	Group 3 vs 1	1624688_at	107.133	2584.3	24.1223	0	35	DEG	Group 3 vs 2	1624688_at	3453.48	2584.3	-1.33633	0	594	DEG<1.5/-1.140	1624688_at	CG9360 /// DsimCG9360	--- /// ---	chrX:11657504-11658621 (-) // 100.0 //	0008152 // metabolic process // inferred from electronic annotation /// 0055114 // oxidation reduction // inferred from electronic annotation	---	0003824 // catalytic activity // inferred from electronic annotation /// 0005488 // binding // inferred from electronic annotation /// 0005515 // protein binding // inferred from physical interaction /// 0016491 // oxidoreductase activity // inferred from electronic annotation /// 0016614 // oxidoreductase activity, acting on CH-OH group of donors // inferred from sequence or structural similarity
Group 2 vs 1	1641567_at	lcs /// sesB	FBgn0028583	221.619	6690.05	30.1872	0	51	DEG	Group 3 vs 1	1641567_at	221.619	4968.8	22.4205	0	39	DEG	Group 3 vs 2	1641567_at	6690.05	4968.8	-1.34641	0	572	DEG<1.5/-1.118	1641567_at	lcs /// sesB	la costa /// lethal(1)9Ed	chrX:21267753-21268326 (-) // 100.0 //	0006810 // transport // inferred from electronic annotation /// 0006817 // phosphate transport // inferred from electronic annotation /// 0006839 // mitochondrial transport // inferred from mutant phenotype /// 0006911 // phagocytosis, engulfment // inferred from mutant phenotype /// 0007629 // flight behavior // inferred from mutant phenotype /// 0009612 // response to mechanical stimulus // inf…	0005737 // cytoplasm // inferred from electronic annotation /// 0005739 // mitochondrion // inferred from electronic annotation /// 0005740 // mitochondrial envelope // inferred from sequence or structural similarity /// 0005743 // mitochondrial inner membrane // inferred from sequence or structural similarity /// 0005743 // mitochondrial inner membrane // non-traceable author statement /// 00057…	0005215 // transporter activity // inferred from electronic annotation /// 0005261 // cation channel activity // inferred from electronic annotation /// 0005471 // ATP:ADP antiporter activity // inferred from mutant phenotype /// 0005471 // ATP:ADP antiporter activity // inferred from sequence or structural similarity /// 0005471 // ATP:ADP antiporter activity // non-traceable author statement //…
Group 2 vs 1	1626326_at	CG31436	FBgn0051436	75.8788	2259.12	29.7727	0	52	DEG	Group 3 vs 1	1626326_at	75.8788	2230.19	29.3914	0	31	DEG	Group 3 vs 2	1626326_at	2259.12	2230.19	-1.01297			nonDEG	1626326_at	CG31436	---	chr3R:21129920-21131311 (+) // 100.0 //	---	---	---
Group 2 vs 1	1638206_at	CG30458	FBgn0050458	142.94	3968.43	27.7628	0	53	DEG	Group 3 vs 1	1638206_at	142.94	494.996	3.46296	0.025818	1188	DEG	Group 3 vs 2	1638206_at	3968.43	494.996	-8.01708	0	44	DEG	1638206_at	CG30458	---	chr2R:13045834-13046536 (-) // 100.0 //	---	---	---
Group 2 vs 1	1627986_s_at	PGRP-SC1a /// PGRP-SC1b	FBgn0033327 /// FBgn0043576	5681.78	228.221	-24.8959	0	54	DEG	Group 3 vs 1	1627986_s_at	5681.78	162.346	-34.9979	0	27	DEG	Group 3 vs 2	1627986_s_at	228.221	162.346	-1.40577	0.0591193		nonDEG	1627986_s_at	PGRP-SC1a /// PGRP-SC1b	PGRP-SC1a /// PGRP-SC1b	chr2R:4600948-4601587 (+) // 100.0 // /// chr2R:4597235-4597821 (+) // 91.39 //	0006952 // defense response // non-traceable author statement /// 0006955 // immune response // inferred from sequence or structural similarity /// 0006955 // immune response // inferred from electronic annotation /// 0009253 // peptidoglycan catabolic process // inferred from sequence or structural similarity /// 0009253 // peptidoglycan catabolic process // inferred from electronic annotation /…	0005576 // extracellular region // inferred from sequence or structural similarity /// 0005576 // extracellular region // inferred from electronic annotation /// 0005576 // extracellular region // non-traceable author statement /// 0005887 // integral to plasma membrane // non-traceable author statement	0005515 // protein binding // inferred from electronic annotation /// 0005515 // protein binding // inferred from physical interaction /// 0008270 // zinc ion binding // inferred from electronic annotation /// 0008745 // N-acetylmuramoyl-L-alanine amidase activity // inferred from direct assay /// 0008745 // N-acetylmuramoyl-L-alanine amidase activity // inferred from electronic annotation /// 00…
Group 2 vs 1	1623675_at	Obp99b	FBgn0039685	12890.9	575.995	-22.3802	0	55	DEG	Group 3 vs 1	1623675_at	12890.9	10835	-1.18975	0		nonDEG	Group 3 vs 2	1623675_at	575.995	10835	18.8109	0	30	DEG	1623675_at	Obp99b	turn on sex-specificity	chr3R:25541972-25542532 (-) // 100.0 //	0006810 // transport // inferred from electronic annotation /// 0007606 // sensory perception of chemical stimulus // inferred from sequence or structural similarity /// 0007608 // sensory perception of smell // inferred from electronic annotation /// 0019236 // response to pheromone // inferred from sequence or structural similarity /// 0035071 // salivary gland cell autophagic cell death // inf…	0005576 // extracellular region // inferred from sequence or structural similarity /// 0005576 // extracellular region // inferred from electronic annotation	0005549 // odorant binding // inferred from sequence or structural similarity /// 0005549 // odorant binding // non-traceable author statement /// 0005549 // odorant binding // inferred from electronic annotation
Group 2 vs 1	1624950_a_at	CG14823	FBgn0035734	3397.61	161.954	-20.9789	0	56	DEG	Group 3 vs 1	1624950_a_at	3397.61	168.92	-20.1137	0	40	DEG	Group 3 vs 2	1624950_a_at	161.954	168.92	1.04302			nonDEG	1624950_a_at	CG14823	---	chr3L:7059413-7061335 (+) // 100.0 //	---	---	---
Group 2 vs 1	1625141_at	CG14715	FBgn0037930	65.2365	1360.42	20.8536	0	57	DEG	Group 3 vs 1	1625141_at	65.2365	1301.64	19.9527	0	41	DEG	Group 3 vs 2	1625141_at	1360.42	1301.64	-1.04515	0.161942		nonDEG	1625141_at	CG14715	---	chr3R:7499940-7500654 (+) // 100.0 //	0006457 // protein folding // inferred from electronic annotation /// 0006470 // protein amino acid dephosphorylation // inferred from electronic annotation	0005783 // endoplasmic reticulum // inferred from electronic annotation	0003755 // peptidyl-prolyl cis-trans isomerase activity // inferred from sequence or structural similarity /// 0003755 // peptidyl-prolyl cis-trans isomerase activity // inferred from electronic annotation /// 0004725 // protein tyrosine phosphatase activity // inferred from electronic annotation /// 0005515 // protein binding // inferred from physical interaction /// 0005528 // FK506 binding // …
Group 2 vs 1	1630720_at	CG32249	FBgn0052249	6623.36	341.81	-19.3773	0	58	DEG	Group 3 vs 1	1630720_at	6623.36	5274.22	-1.2558	0	628	DEG_FC<1.5/-1.224	Group 3 vs 2	1630720_at	341.81	5274.22	15.4302	0	34	DEG	1630720_at	CG32249	---	chr3L:4468351-4471032 (+) // 100.0 //	---	---	0004871 // signal transducer activity // inferred from sequence or structural similarity
Group 2 vs 1	1636330_at	CG17107	FBgn0032281	5631.15	310.746	-18.1214	0	59	DEG	Group 3 vs 1	1636330_at	5631.15	4116.89	-1.36782	0	502	DEG_FC<1.5/-1.98	Group 3 vs 2	1636330_at	310.746	4116.89	13.2484	0	38	DEG	1636330_at	CG17107	---	chr2L:10681972-10682405 (+) // 100.0 //	---	---	---
Group 2 vs 1	1633445_at	CG8541	FBgn0035788	73.9236	1323.47	17.9032	0	60	DEG	Group 3 vs 1	1633445_at	73.9236	147.762	1.99884	0.0748965		nonDEG	Group 3 vs 2	1633445_at	1323.47	147.762	-8.95677	0.00125815	901	DEG	1633445_at	CG8541	---	chr3L:7464709-7465537 (+) // 100.0 //	---	---	0005214 // structural constituent of chitin-based cuticle // inferred from sequence or structural similarity /// 0005515 // protein binding // inferred from physical interaction
Group 2 vs 1	1623871_at	CG18563	FBgn0032639	565.697	31.6147	-17.8935	0	61	DEG	Group 3 vs 1	1623871_at	565.697	177.52	-3.18667	0.00163188	762	DEG	Group 3 vs 2	1623871_at	31.6147	177.52	5.61511	0.00385988	1191	DEG	1623871_at	CG18563	---	chr2L:17456754-17457781 (-) // 100.0 //	0006508 // proteolysis // inferred from electronic annotation	---	0003824 // catalytic activity // inferred from electronic annotation /// 0004252 // serine-type endopeptidase activity // inferred from electronic annotation /// 0004252 // serine-type endopeptidase activity // non-traceable author statement /// 0005515 // protein binding // inferred from physical interaction
Group 2 vs 1	1628519_at	CG15741	FBgn0030338	388.474	6439.38	16.5761	0	62	DEG	Group 3 vs 1	1628519_at	388.474	3214.58	8.27488	0	67	DEG	Group 3 vs 2	1628519_at	6439.38	3214.58	-2.00318	0	245	DEG	1628519_at	CG15741	---	chrX:11731635-11732043 (-) // 100.0 //	---	---	0005515 // protein binding // inferred from physical interaction
Group 2 vs 1	1622946_at	CG6908	FBgn0037936	4840.2	297.53	-16.2679	0	63	DEG	Group 3 vs 1	1622946_at	4840.2	168.619	-28.705	0	33	DEG	Group 3 vs 2	1622946_at	297.53	168.619	-1.76452	0.0218073	1981	DEG	1622946_at	CG6908	---	chr3R:7514098-7515745 (-) // 100.0 //	---	---	---
Group 2 vs 1	1632942_at	CG13060	FBgn0036606	264.814	4253.39	16.0618	0	64	DEG	Group 3 vs 1	1632942_at	264.814	1142.92	4.31594	0.0011132	710	DEG	Group 3 vs 2	1632942_at	4253.39	1142.92	-3.72151	0	102	DEG	1632942_at	CG13060	---	chr3L:16312960-16313562 (+) // 99.09 //	---	---	---
Group 2 vs 1	1639851_at	CG13069	FBgn0040798	149.887	2371.83	15.8241	0	65	DEG	Group 3 vs 1	1639851_at	149.887	617.089	4.11703	0.00525928	912	DEG	Group 3 vs 2	1639851_at	2371.83	617.089	-3.84357	0	96	DEG	1639851_at	CG13069	---	chr3L:16258529-16258823 (+) // 100.0 //	---	---	---
Group 2 vs 1	1634623_a_at	---	FBgn0033302	79.3028	1229.06	15.4984	0	66	DEG	Group 3 vs 1	1634623_a_at	79.3028	1019.57	12.8567	0	51	DEG	Group 3 vs 2	1634623_a_at	1229.06	1019.57	-1.20547	0.0231421	2021	DEG<1.5/-1.948	1634623_a_at	---	---	chr2R:4451848-4453442 (-) // 100.0 //	0055114 // oxidation reduction // inferred from electronic annotation	0005783 // endoplasmic reticulum // inferred from electronic annotation /// 0005789 // endoplasmic reticulum membrane // inferred from electronic annotation /// 0005792 // microsome // non-traceable author statement /// 0005792 // microsome // inferred from electronic annotation /// 0016020 // membrane // non-traceable author statement /// 0016020 // membrane // inferred from electronic annotation	0004497 // monooxygenase activity // inferred from electronic annotation /// 0005506 // iron ion binding // inferred from electronic annotation /// 0005515 // protein binding // inferred from physical interaction /// 0009055 // electron carrier activity // inferred from electronic annotation /// 0009055 // electron carrier activity // inferred from sequence or structural similarity /// 0009055 //…
Group 2 vs 1	1630282_at	CG14852	FBgn0038242	809.717	53.9582	-15.0064	0	67	DEG	Group 3 vs 1	1630282_at	809.717	225.16	-3.59618	0	137	DEG	Group 3 vs 2	1630282_at	53.9582	225.16	4.17286	0.00994397	1560	DEG	1630282_at	CG14852	---	chr3R:10391667-10392192 (+) // 100.0 //	---	---	---
Group 2 vs 1	1625142_s_at	CG33268 /// CG7377	FBgn0036176 /// FBgn0036177	228.751	3349.44	14.6423	0	68	DEG	Group 3 vs 1	1625142_s_at	228.751	2129.2	9.30792	0	61	DEG	Group 3 vs 2	1625142_s_at	3349.44	2129.2	-1.5731	0	410	DEG	1625142_s_at	CG33268 /// CG7377	--- /// ---	chr3L:11582794-11583079 (+) // 96.84 // /// chr3L:11584037-11584322 (-) // 100.0 //	---	---	---
Group 2 vs 1	1637357_at	CG9463	FBgn0032066	2040.83	139.676	-14.6112	0	69	DEG	Group 3 vs 1	1637357_at	2040.83	2789.63	1.36691	0	504	DEG_FC<1.5/-1.100	Group 3 vs 2	1637357_at	139.676	2789.63	19.9722	0	28	DEG	1637357_at	CG9463	---	chr2L:8765358-8768708 (-) // 100.0 //	0005975 // carbohydrate metabolic process // inferred from electronic annotation /// 0006013 // mannose metabolic process // inferred from electronic annotation /// 0008152 // metabolic process // inferred from electronic annotation	0005764 // lysosome // inferred from sequence or structural similarity	0003824 // catalytic activity // inferred from electronic annotation /// 0004559 // alpha-mannosidase activity // inferred from sequence or structural similarity /// 0004559 // alpha-mannosidase activity // inferred from electronic annotation /// 0005515 // protein binding // inferred from physical interaction /// 0015923 // mannosidase activity // inferred from electronic annotation /// 0016787 …
Group 2 vs 1	1625053_at	CG16898	FBgn0034480	88.7932	1241.75	13.9847	0	70	DEG	Group 3 vs 1	1625053_at	88.7932	718.534	8.09222	0	69	DEG	Group 3 vs 2	1625053_at	1241.75	718.534	-1.72817	0.00218255	1006	DEG	1625053_at	CG16898	---	chr2R:15891123-15892492 (-) // 100.0 //	---	---	---
Group 2 vs 1	1639982_at	CG15369	FBgn0030105	591.69	43.5424	-13.5888	0	71	DEG	Group 3 vs 1	1639982_at	591.69	697.602	1.179	0.0917949		nonDEG	Group 3 vs 2	1639982_at	43.5424	697.602	16.0212	0	33	DEG	1639982_at	CG15369	---	chrX:9110958-9111380 (+) // 100.0 //	---	---	0004869 // cysteine protease inhibitor activity // inferred from sequence or structural similarity /// 0004869 // cysteine protease inhibitor activity // inferred from electronic annotation
Group 2 vs 1	1630487_s_at	Hsp22 /// Hsp67Bb	FBgn0001223 /// FBgn0001228	554.109	41.7072	-13.2857	0	72	DEG	Group 3 vs 1	1630487_s_at	554.109	65.0079	-8.52372	0	65	DEG	Group 3 vs 2	1630487_s_at	41.7072	65.0079	1.55867	0.174271		nonDEG	1630487_s_at	Hsp22 /// Hsp67Bb	heat shock protein hsp22 /// Gene 2	chr3L:9366030-9366749 (+) // 100.0 //	0006950 // response to stress // inferred from electronic annotation /// 0008340 // determination of adult life span // inferred from mutant phenotype /// 0009408 // response to heat // non-traceable author statement /// 0009408 // response to heat // inferred from sequence or structural similarity /// 0042026 // protein refolding // non-traceable author statement	---	---
Group 2 vs 1	1632849_at	nol	FBgn0014368	1860.51	140.527	-13.2395	0	73	DEG	Group 3 vs 1	1632849_at	1860.51	58.4389	-31.8369	0	29	DEG	Group 3 vs 2	1632849_at	140.527	58.4389	-2.40468			nonDEG	1632849_at	nol	no optic lobe	chr3L:11123934-11124502 (+) // 99.3 //	0006817 // phosphate transport // inferred from electronic annotation /// 0007405 // neuroblast proliferation // non-traceable author statement	0005576 // extracellular region // non-traceable author statement /// 0016020 // membrane // inferred from electronic annotation	0005315 // inorganic phosphate transmembrane transporter activity // inferred from electronic annotation
Group 2 vs 1	1624177_at	Cpr67Fa1	FBgn0036108	645.038	8330.26	12.9144	0	74	DEG	Group 3 vs 1	1624177_at	645.038	5598.27	8.67897	0	64	DEG	Group 3 vs 2	1624177_at	8330.26	5598.27	-1.48801	0	466	DEG<1.5/-1.12	1624177_at	Cpr67Fa1	CG7941	chr3L:10883095-10883804 (+) // 100.0 //	---	---	0005214 // structural constituent of chitin-based cuticle // inferred from sequence or structural similarity /// 0008010 // structural constituent of chitin-based larval cuticle // inferred from sequence or structural similarity /// 0042302 // structural constituent of cuticle // inferred from electronic annotation
Group 2 vs 1	1641481_at	Ugt86Dd	FBgn0040256	132.263	1650.97	12.4825	0	75	DEG	Group 3 vs 1	1641481_at	132.263	586.46	4.43403	0	107	DEG	Group 3 vs 2	1641481_at	1650.97	586.46	-2.81515	0	142	DEG	1641481_at	Ugt86Dd	Ugt86Dd	chr3R:6952421-6954162 (-) // 100.0 //	0008152 // metabolic process // inferred from electronic annotation	---	0015020 // glucuronosyltransferase activity // inferred from sequence or structural similarity /// 0015020 // glucuronosyltransferase activity // inferred from electronic annotation /// 0016740 // transferase activity // inferred from electronic annotation /// 0016757 // transferase activity, transferring glycosyl groups // inferred from electronic annotation /// 0016758 // transferase activity, …
Group 2 vs 1	1626765_at	TwdlB	FBgn0039436	461.364	5504.79	11.9315	0	76	DEG	Group 3 vs 1	1626765_at	461.364	508.109	1.10132			nonDEG	Group 3 vs 2	1626765_at	5504.79	508.109	-10.8339	0.00122368	892	DEG	1626765_at	TwdlB	CG6478	chr3R:22448172-22449270 (-) // 100.0 //	---	---	---
Group 2 vs 1	1625374_at	CG9466	FBgn0032068	3523.8	304.438	-11.5748	0	77	DEG	Group 3 vs 1	1625374_at	3523.8	2578.6	-1.36656	0	505	DEG_FC<1.5/-1.101	Group 3 vs 2	1625374_at	304.438	2578.6	8.47003	0	43	DEG	1625374_at	CG9466	---	chr2L:8772947-8776261 (-) // 100.0 //	0005975 // carbohydrate metabolic process // inferred from electronic annotation /// 0006013 // mannose metabolic process // inferred from electronic annotation /// 0008152 // metabolic process // inferred from electronic annotation	0005764 // lysosome // inferred from sequence or structural similarity	0003824 // catalytic activity // inferred from electronic annotation /// 0004559 // alpha-mannosidase activity // inferred from sequence or structural similarity /// 0004559 // alpha-mannosidase activity // inferred from electronic annotation /// 0015923 // mannosidase activity // inferred from electronic annotation /// 0016787 // hydrolase activity // inferred from electronic annotation /// 0016…
Group 2 vs 1	1629238_at	CG13047	FBgn0036594	101.354	1172.82	11.5716	0	78	DEG	Group 3 vs 1	1629238_at	101.354	283.773	2.79983	0.0182274	1118	DEG	Group 3 vs 2	1629238_at	1172.82	283.773	-4.13295	0.00125311	900	DEG	1629238_at	CG13047	---	chr3L:16277864-16279242 (-) // 100.0 //	---	---	0005515 // protein binding // inferred from physical interaction
Group 2 vs 1	1635270_at	---	FBgn0034317	1914.58	181.025	-10.5763	0	79	DEG	Group 3 vs 1	1635270_at	1914.58	206.254	-9.28261	0	62	DEG	Group 3 vs 2	1635270_at	181.025	206.254	1.13937			nonDEG	1635270_at	---	---	chr2R:14075437-14075794 (+) // 100.0 //	---	---	---
Group 2 vs 1	1629011_at	TwdlN	FBgn0039441	321.352	3389.83	10.5487	0	80	DEG	Group 3 vs 1	1629011_at	321.352	611.735	1.90363	0.0490009	1352	DEG	Group 3 vs 2	1629011_at	3389.83	611.735	-5.54134	0	64	DEG	1629011_at	TwdlN	CG5476	chr3R:22457594-22458680 (+) // 100.0 //	---	---	---
Group 2 vs 1	1629355_at	CG17374	FBgn0040001	580.656	55.8277	-10.4009	0	81	DEG	Group 3 vs 1	1629355_at	580.656	822.242	1.41606	0.0202588	1913	DEG_FC<1.5/-1.1990	Group 3 vs 2	1629355_at	55.8277	822.242	14.7282	0	36	DEG	1629355_at	CG17374	---	chr3LHet:1135555-1143362 (-) // 100.0 //	0006633 // fatty acid biosynthetic process // inferred from sequence or structural similarity /// 0008152 // metabolic process // inferred from electronic annotation /// 0009058 // biosynthetic process // inferred from electronic annotation	0005835 // fatty acid synthase complex // inferred from sequence or structural similarity	0003824 // catalytic activity // inferred from electronic annotation /// 0004312 // fatty-acid synthase activity // inferred from sequence or structural similarity /// 0004312 // fatty-acid synthase activity // inferred from electronic annotation /// 0005488 // binding // inferred from electronic annotation /// 0008415 // acyltransferase activity // inferred from electronic annotation /// 0016491…
Group 2 vs 1	1628713_at	Cpr65Aw	FBgn0052404	1249.85	121.229	-10.3098	0	82	DEG	Group 3 vs 1	1628713_at	1249.85	816.869	-1.53005	0.00638097	938	DEG	Group 3 vs 2	1628713_at	121.229	816.869	6.73822	0	53	DEG	1628713_at	Cpr65Aw	CG32404	chr3L:6135064-6135483 (-) // 100.0 //	---	---	0005214 // structural constituent of chitin-based cuticle // inferred from sequence or structural similarity /// 0042302 // structural constituent of cuticle // inferred from electronic annotation
Group 2 vs 1	1634152_at	GstD5	FBgn0010041	162.441	1637.04	10.0778	0	83	DEG	Group 3 vs 1	1634152_at	162.441	909.122	5.59664	0	86	DEG	Group 3 vs 2	1634152_at	1637.04	909.122	-1.80068	0	313	DEG	1634152_at	GstD5	Glutathione S transferase D5	chr3R:8201485-8202136 (+) // 100.0 //	---	---	0004364 // glutathione transferase activity // inferred from sequence or structural similarity /// 0004364 // glutathione transferase activity // non-traceable author statement /// 0004364 // glutathione transferase activity // inferred from electronic annotation /// 0016740 // transferase activity // inferred from electronic annotation
Group 2 vs 1	1624137_at	CG11911	FBgn0031249	8496.24	868.136	-9.78676	0	84	DEG	Group 3 vs 1	1624137_at	8496.24	217.164	-39.1236	0	25	DEG	Group 3 vs 2	1624137_at	868.136	217.164	-3.9976	0	90	DEG	1624137_at	CG11911	---	chr2L:320278-321246 (-) // 100.0 //	0006508 // proteolysis // inferred from electronic annotation /// 0006508 // proteolysis // non-traceable author statement	---	0003824 // catalytic activity // inferred from electronic annotation /// 0004252 // serine-type endopeptidase activity // inferred from electronic annotation /// 0008233 // peptidase activity // inferred from electronic annotation /// 0008236 // serine-type peptidase activity // inferred from electronic annotation /// 0016787 // hydrolase activity // inferred from electronic annotation
Group 2 vs 1	1623256_at	GstE1	FBgn0034335	132.936	1297.03	9.75685	0	85	DEG	Group 3 vs 1	1623256_at	132.936	1314.86	9.89098	0	56	DEG	Group 3 vs 2	1623256_at	1297.03	1314.86	1.01375	0.177605		nonDEG	1623256_at	GstE1	glutathione-S-transferase	chr2R:14285894-14286729 (+) // 100.0 //	0006979 // response to oxidative stress // non-traceable author statement	---	0004364 // glutathione transferase activity // inferred from sequence or structural similarity /// 0004364 // glutathione transferase activity // non-traceable author statement /// 0004364 // glutathione transferase activity // inferred from electronic annotation /// 0016740 // transferase activity // inferred from electronic annotation
Group 2 vs 1	1635601_at	CG42335	FBgn0038900	1033.53	108.781	-9.50094	0	86	DEG	Group 3 vs 1	1635601_at	1033.53	156.93	-6.58589	0	77	DEG	Group 3 vs 2	1635601_at	108.781	156.93	1.44262	0.0852169		nonDEG	1635601_at	CG42335	CG13420	chr3R:17594409-17595023 (+) // 100.0 //	0006508 // proteolysis // inferred from electronic annotation	---	---
Group 2 vs 1	1628376_x_at	CG13947	FBgn0031277	503.979	53.6502	-9.39379	0	87	DEG	Group 3 vs 1	1628376_x_at	503.979	36.5209	-13.7997	0	48	DEG	Group 3 vs 2	1628376_x_at	53.6502	36.5209	-1.46903			nonDEG	1628376_x_at	CG13947	---	chr2L:779203-779563 (+) // 100.0 //	---	---	---
Group 2 vs 1	1632120_at	CG15533	FBgn0039768	3111.46	336.89	-9.23585	0	88	DEG	Group 3 vs 1	1632120_at	3111.46	1533.15	-2.02945	0	263	DEG	Group 3 vs 2	1632120_at	336.89	1533.15	4.55091	0	81	DEG	1632120_at	CG15533	---	chr3R:26254547-26257091 (+) // 100.0 //	0006684 // sphingomyelin metabolic process // inferred from sequence or structural similarity /// 0006685 // sphingomyelin catabolic process // inferred from electronic annotation	---	0004767 // sphingomyelin phosphodiesterase activity // inferred from sequence or structural similarity /// 0004767 // sphingomyelin phosphodiesterase activity // inferred from electronic annotation /// 0005515 // protein binding // inferred from physical interaction /// 0016787 // hydrolase activity // inferred from electronic annotation
Group 2 vs 1	1629727_at	CG14258	FBgn0039482	1195.25	130.649	-9.14854	0	89	DEG	Group 3 vs 1	1629727_at	1195.25	1206.43	1.00936	0.0651226		nonDEG	Group 3 vs 2	1629727_at	130.649	1206.43	9.23414	0	41	DEG	1629727_at	CG14258	---	chr3R:22918900-22919858 (+) // 100.0 //	---	---	0005515 // protein binding // inferred from physical interaction
Group 2 vs 1	1625744_at	GstE6	FBgn0063494	238.22	2084.06	8.74844	0	90	DEG	Group 3 vs 1	1625744_at	238.22	2547.36	10.6933	0	53	DEG	Group 3 vs 2	1625744_at	2084.06	2547.36	1.22231	0	745	DEG<1.5/-1.291	1625744_at	GstE6	Glutathione S transferase E6	chr2R:14293517-14294270 (+) // 100.0 //	---	---	0004364 // glutathione transferase activity // inferred from sequence or structural similarity /// 0004364 // glutathione transferase activity // inferred from electronic annotation /// 0016740 // transferase activity // inferred from electronic annotation
Group 2 vs 1	1623027_s_at	CG6271 /// CG6277	FBgn0039475 /// FBgn0039476	2044.6	239.572	-8.5344	0	91	DEG	Group 3 vs 1	1623027_s_at	2044.6	5352.42	2.61783	0	193	DEG	Group 3 vs 2	1623027_s_at	239.572	5352.42	22.3416	0	26	DEG	1623027_s_at	CG6271 /// CG6277	--- /// ---	chr3R:22847790-22848934 (-) // 100.0 //	0006629 // lipid metabolic process // inferred from electronic annotation /// 0016042 // lipid catabolic process // inferred from electronic annotation	0005576 // extracellular region // inferred from electronic annotation	0003824 // catalytic activity // inferred from electronic annotation /// 0004806 // triacylglycerol lipase activity // inferred from sequence or structural similarity /// 0005515 // protein binding // inferred from physical interaction /// 0008970 // phospholipase A1 activity // inferred from electronic annotation /// 0016787 // hydrolase activity // inferred from electronic annotation
Group 2 vs 1	1632517_at	CG7966	FBgn0038115	1536.83	13112.1	8.53186	0	92	DEG	Group 3 vs 1	1632517_at	1536.83	12568.7	8.1783	0	68	DEG	Group 3 vs 2	1632517_at	13112.1	12568.7	-1.04323	0.00351786		nonDEG	1632517_at	CG7966	---	chr3R:8875119-8877172 (-) // 100.0 //	---	---	0008430 // selenium binding // inferred from sequence or structural similarity /// 0008430 // selenium binding // inferred from electronic annotation
Group 2 vs 1	1641365_s_at	---	---	121.06	973.449	8.04104	0	93	DEG	Group 3 vs 1	1641365_s_at	121.06	1091.65	9.01745	0	63	DEG	Group 3 vs 2	1641365_s_at	973.449	1091.65	1.12143	0.0154015		nonDEG	1641365_s_at	---	---	chrUextra:19074465-19214833 (+) // 49.65 // /// chrUextra:21519474-21520142 (+) // 47.04 // /// chrUextra:780129-780762 (+) // 44.64 // /// chrUextra:8255386-8255969 (+) // 41.04 // /// chrUextra:8086470-8087046 (+) // 40.34 // /// chr2RHet:690043-691461 (+) // 100.0 // /// chr2RHet:1122620-1124038 (+) // 97.67 // /// chr2RHet:1127969-1129340 (+) // 94.22 // /// chr2R:14468044-14469465 (+) // 99.…	0015074 // DNA integration // inferred from electronic annotation	0005622 // intracellular // inferred from electronic annotation /// 0005634 // nucleus // inferred from sequence or structural similarity /// 0005634 // nucleus // inferred from electronic annotation	0003676 // nucleic acid binding // inferred from electronic annotation /// 0003677 // DNA binding // inferred from electronic annotation /// 0003700 // transcription factor activity // inferred from sequence or structural similarity /// 0008270 // zinc ion binding // inferred from electronic annotation /// 0046872 // metal ion binding // inferred from electronic annotation
Group 2 vs 1	1630621_at	CG15212	FBgn0040842	170.394	1332.53	7.8203	0	94	DEG	Group 3 vs 1	1630621_at	170.394	610.127	3.58068	0	138	DEG	Group 3 vs 2	1630621_at	1332.53	610.127	-2.18403	0.00602699	1332	DEG	1630621_at	CG15212	---	chr3L:5124649-5125229 (+) // 100.0 //	---	---	---
Group 2 vs 1	1626198_at	Cyp4d8	FBgn0015033	546.358	71.3885	-7.65331	0	95	DEG	Group 3 vs 1	1626198_at	546.358	503.975	-1.0841	0.131117		nonDEG	Group 3 vs 2	1626198_at	71.3885	503.975	7.05961	0	51	DEG	1626198_at	Cyp4d8	Cytochrome P450-4d8	chr3L:7486648-7489279 (-) // 100.0 //	0055114 // oxidation reduction // inferred from electronic annotation	0005783 // endoplasmic reticulum // inferred from electronic annotation /// 0005789 // endoplasmic reticulum membrane // inferred from electronic annotation /// 0005792 // microsome // non-traceable author statement /// 0005792 // microsome // inferred from electronic annotation /// 0016020 // membrane // non-traceable author statement /// 0016020 // membrane // inferred from electronic annotation	0004497 // monooxygenase activity // inferred from electronic annotation /// 0005506 // iron ion binding // inferred from electronic annotation /// 0009055 // electron carrier activity // inferred from electronic annotation /// 0009055 // electron carrier activity // inferred from sequence or structural similarity /// 0009055 // electron carrier activity // non-traceable author statement /// 0016…
Group 2 vs 1	1630593_at	NLaz	FBgn0053126	691.813	91.0245	-7.6003	0	96	DEG	Group 3 vs 1	1630593_at	691.813	165.665	-4.17598	0	116	DEG	Group 3 vs 2	1630593_at	91.0245	165.665	1.82	0.062785		nonDEG	1630593_at	NLaz	Neural Lazarillo	chr2L:1359982-1361732 (-) // 100.0 //	0006810 // transport // inferred from electronic annotation	0005615 // extracellular space // inferred from direct assay	0005215 // transporter activity // inferred from electronic annotation /// 0005488 // binding // non-traceable author statement /// 0005488 // binding // inferred from electronic annotation /// 0008289 // lipid binding // inferred from sequence or structural similarity /// 0008289 // lipid binding // inferred from electronic annotation
Group 2 vs 1	1639733_s_at	CG14275	FBgn0032022	187.915	1427.45	7.59628	0	97	DEG	Group 3 vs 1	1639733_s_at	187.915	376.559	2.00388	0.0246069	1180	DEG	Group 3 vs 2	1639733_s_at	1427.45	376.559	-3.79078	0	100	DEG	1639733_s_at	CG14275	---	chr2L:8327457-8332911 (+) // 100.0 //	---	---	---
Group 2 vs 1	1640878_at	Cpr49Ad	FBgn0033726	199.897	1501.53	7.51153	0	98	DEG	Group 3 vs 1	1640878_at	199.897	476.339	2.38293	0.00670183	949	DEG	Group 3 vs 2	1640878_at	1501.53	476.339	-3.15223	0	120	DEG	1640878_at	Cpr49Ad	CG8836	chr2R:8278537-8279159 (-) // 100.0 //	---	---	0005214 // structural constituent of chitin-based cuticle // inferred from sequence or structural similarity /// 0008010 // structural constituent of chitin-based larval cuticle // inferred from sequence or structural similarity /// 0042302 // structural constituent of cuticle // inferred from electronic annotation
Group 2 vs 1	1635413_at	CG32266	FBgn0052266	292.842	2160.32	7.37709	0	99	DEG	Group 3 vs 1	1635413_at	292.842	668.654	2.28333	0.00370606	866	DEG	Group 3 vs 2	1635413_at	2160.32	668.654	-3.23085	0	115	DEG	1635413_at	CG32266	---	chr3L:3790803-3791562 (+) // 100.0 //	---	---	---
Group 2 vs 1	1631803_at	Lsp1alpha	FBgn0002562	12955.7	1808.93	-7.16209	0	100	DEG	Group 3 vs 1	1631803_at	12955.7	12049.3	-1.07523	0.00879927		nonDEG	Group 3 vs 2	1631803_at	1808.93	12049.3	6.66099	0	54	DEG	1631803_at	Lsp1alpha	Larval serum protein 1 alpha	chrX:12384415-12386933 (+) // 100.0 //	0006810 // transport // inferred from electronic annotation	0005576 // extracellular region // non-traceable author statement /// 0005576 // extracellular region // inferred from electronic annotation /// 0005616 // larval serum protein complex // inferred from direct assay /// 0005616 // larval serum protein complex // inferred from sequence or structural similarity /// 0005811 // lipid particle // inferred from direct assay	0005344 // oxygen transporter activity // inferred from electronic annotation /// 0045735 // nutrient reservoir activity // non-traceable author statement /// 0045735 // nutrient reservoir activity // inferred from electronic annotation
Group 2 vs 1	1623452_at	CG13068	FBgn0036588	852.054	6054.62	7.10591	0	101	DEG	Group 3 vs 1	1623452_at	852.054	1737.36	2.03903	0	261	DEG	Group 3 vs 2	1623452_at	6054.62	1737.36	-3.48495	0	107	DEG	1623452_at	CG13068	---	chr3L:16262534-16262934 (+) // 100.0 //	---	---	---
Group 2 vs 1	1624732_at	GstE5	FBgn0063495	136.651	970.333	7.10084	0	102	DEG	Group 3 vs 1	1624732_at	136.651	945.43	6.9186	0	74	DEG	Group 3 vs 2	1624732_at	970.333	945.43	-1.02634			nonDEG	1624732_at	GstE5	Glutathione S transferase E5	chr2R:14292138-14292807 (+) // 100.0 //	---	---	0004364 // glutathione transferase activity // inferred from sequence or structural similarity /// 0004364 // glutathione transferase activity // inferred from electronic annotation /// 0016740 // transferase activity // inferred from electronic annotation
Group 2 vs 1	1641191_s_at	Ugt36Bc	FBgn0040260	1229.73	8564.9	6.96488	0	103	DEG	Group 3 vs 1	1641191_s_at	1229.73	4391.29	3.57095	0	139	DEG	Group 3 vs 2	1641191_s_at	8564.9	4391.29	-1.95043	0	261	DEG	1641191_s_at	Ugt36Bc	Ugt36Bc	chr2L:16799028-16801585 (+) // 100.0 //	0008152 // metabolic process // inferred from electronic annotation	---	0015020 // glucuronosyltransferase activity // inferred from sequence or structural similarity /// 0015020 // glucuronosyltransferase activity // inferred from electronic annotation /// 0016740 // transferase activity // inferred from electronic annotation /// 0016757 // transferase activity, transferring glycosyl groups // inferred from electronic annotation /// 0016758 // transferase activity, …
Group 2 vs 1	1633409_a_at	CG10598	FBgn0003057	199.725	1375.79	6.88842	0	104	DEG	Group 3 vs 1	1633409_a_at	199.725	199.97	1.00123	0.216318		nonDEG	Group 3 vs 2	1633409_a_at	1375.79	199.97	-6.87995	0	52	DEG	1633409_a_at	CG10598	---	chrX:17119743-17120592 (-) // 100.0 //	---	---	---
Group 2 vs 1	1633639_at	Cyp28d1	FBgn0031689	650.119	94.6265	-6.87037	0	105	DEG	Group 3 vs 1	1633639_at	650.119	615.348	-1.05651	0.159567		nonDEG	Group 3 vs 2	1633639_at	94.6265	615.348	6.50291	0	55	DEG	1633639_at	Cyp28d1	Cyp28d1	chr2L:5210478-5212450 (+) // 100.0 //	0055114 // oxidation reduction // inferred from electronic annotation	0005783 // endoplasmic reticulum // inferred from electronic annotation /// 0005789 // endoplasmic reticulum membrane // inferred from electronic annotation /// 0005792 // microsome // non-traceable author statement /// 0005792 // microsome // inferred from electronic annotation /// 0016020 // membrane // non-traceable author statement /// 0016020 // membrane // inferred from electronic annotation	0004497 // monooxygenase activity // inferred from electronic annotation /// 0005506 // iron ion binding // inferred from electronic annotation /// 0005515 // protein binding // inferred from physical interaction /// 0009055 // electron carrier activity // inferred from electronic annotation /// 0009055 // electron carrier activity // inferred from sequence or structural similarity /// 0009055 //…
Group 2 vs 1	1626025_at	CG34267	FBgn0085296	550.639	3761.3	6.83079	0	106	DEG	Group 3 vs 1	1626025_at	550.639	1330.24	2.41581	0	211	DEG	Group 3 vs 2	1626025_at	3761.3	1330.24	-2.82754	0	141	DEG	1626025_at	CG34267	---	chr3L:501024-501339 (+) // 97.01 // /// chr3L:500076-500373 (-) // 100.0 //	---	---	---
Group 2 vs 1	1631628_s_at	CG12896 /// Prx2540-1 /// Prx2540-2	FBgn0033518 /// FBgn0033520 /// FBgn0033521	1971.51	289.549	-6.8089	0	107	DEG	Group 3 vs 1	1631628_s_at	1971.51	507.442	-3.88518	0	128	DEG	Group 3 vs 2	1631628_s_at	289.549	507.442	1.75253	0.00315013	1106	DEG	1631628_s_at	CG12896 /// Prx2540-1 /// Prx2540-2	AOP2-related /// peroxiredoxin 2540 /// peroxiredoxin 2540	chr2R:6306222-6307278 (+) // 100.0 // /// chr2R:6311940-6312556 (+) // 61.75 // /// chr2R:6314477-6315420 (-) // 83.99 //	0007498 // mesoderm development // inferred from expression pattern /// 0055114 // oxidation reduction // inferred from electronic annotation	---	0004601 // peroxidase activity // inferred from sequence or structural similarity /// 0004601 // peroxidase activity // non-traceable author statement /// 0004601 // peroxidase activity // inferred from electronic annotation /// 0004602 // glutathione peroxidase activity // inferred from sequence or structural similarity /// 0004602 // glutathione peroxidase activity // inferred from electronic a…
Group 2 vs 1	1637275_a_at	---	FBgn0033857	4987.55	775.123	-6.43452	0	108	DEG	Group 3 vs 1	1637275_a_at	4987.55	3227.54	-1.54531	0	393	DEG	Group 3 vs 2	1637275_a_at	775.123	3227.54	4.16391	0	86	DEG	1637275_a_at	---	---	chr2R:9458888-9461734 (-) // 100.0 //	---	---	---
Group 2 vs 1	1623884_at	CG16775	FBgn0036767	2727.36	432.624	-6.30424	0	109	DEG	Group 3 vs 1	1623884_at	2727.36	540.334	-5.04755	0	93	DEG	Group 3 vs 2	1623884_at	432.624	540.334	1.24897	0.0351336	2311	DEG<1.5/-1.734	1623884_at	CG16775	---	chr3L:17879165-17879792 (-) // 100.0 //	---	---	---
Group 2 vs 1	1625760_at	CG30272	FBgn0050272	679.154	110.875	-6.12538	0	110	DEG	Group 3 vs 1	1625760_at	679.154	102.421	-6.63098	0	76	DEG	Group 3 vs 2	1625760_at	110.875	102.421	-1.08254			nonDEG	1625760_at	CG30272	---	chr2R:18717219-18719248 (+) // 100.0 //	0006810 // transport // inferred from electronic annotation	0016021 // integral to membrane // inferred from electronic annotation	0005215 // transporter activity // inferred from electronic annotation
Group 2 vs 1	1636395_at	CG9468	FBgn0032069	4585.18	749.458	-6.11799	0	111	DEG	Group 3 vs 1	1636395_at	4585.18	2853.06	-1.60711	0	369	DEG	Group 3 vs 2	1636395_at	749.458	2853.06	3.80683	0	99	DEG	1636395_at	CG9468	---	chr2L:8777659-8781251 (-) // 100.0 //	0005975 // carbohydrate metabolic process // inferred from electronic annotation /// 0006013 // mannose metabolic process // inferred from electronic annotation /// 0008152 // metabolic process // inferred from electronic annotation	0005764 // lysosome // inferred from sequence or structural similarity	0003824 // catalytic activity // inferred from electronic annotation /// 0004559 // alpha-mannosidase activity // inferred from sequence or structural similarity /// 0004559 // alpha-mannosidase activity // inferred from electronic annotation /// 0015923 // mannosidase activity // inferred from electronic annotation /// 0016787 // hydrolase activity // inferred from electronic annotation /// 0016…
Group 2 vs 1	1638739_at	Cyp4ac3	FBgn0031695	608.927	100.252	-6.07394	0	112	DEG	Group 3 vs 1	1638739_at	608.927	116.134	-5.24334	0	90	DEG	Group 3 vs 2	1638739_at	100.252	116.134	1.15841			nonDEG	1638739_at	Cyp4ac3	Cyp4ac3	chr2L:5268516-5270329 (+) // 100.0 //	0055114 // oxidation reduction // inferred from electronic annotation	0005783 // endoplasmic reticulum // inferred from electronic annotation /// 0005789 // endoplasmic reticulum membrane // inferred from electronic annotation /// 0005792 // microsome // non-traceable author statement /// 0005792 // microsome // inferred from electronic annotation /// 0016020 // membrane // non-traceable author statement /// 0016020 // membrane // inferred from electronic annotation	0004497 // monooxygenase activity // inferred from electronic annotation /// 0005506 // iron ion binding // inferred from electronic annotation /// 0009055 // electron carrier activity // inferred from electronic annotation /// 0009055 // electron carrier activity // inferred from sequence or structural similarity /// 0009055 // electron carrier activity // non-traceable author statement /// 0016…
Group 2 vs 1	1636343_at	CG6283	FBgn0039474	3836.51	644.295	-5.95459	0	113	DEG	Group 3 vs 1	1636343_at	3836.51	4946.73	1.28938	0	586	DEG_FC<1.5/-1.182	Group 3 vs 2	1636343_at	644.295	4946.73	7.67774	0	46	DEG	1636343_at	CG6283	---	chr3R:22845959-22847100 (-) // 99.45 //	0006629 // lipid metabolic process // inferred from electronic annotation /// 0016042 // lipid catabolic process // inferred from electronic annotation	0005576 // extracellular region // inferred from electronic annotation	0003824 // catalytic activity // inferred from electronic annotation /// 0004806 // triacylglycerol lipase activity // inferred from sequence or structural similarity /// 0005515 // protein binding // inferred from physical interaction /// 0008970 // phospholipase A1 activity // inferred from electronic annotation /// 0016787 // hydrolase activity // inferred from electronic annotation
Group 2 vs 1	1636798_at	CG13482	FBgn0036419	2270.37	401.849	-5.64982	0	114	DEG	Group 3 vs 1	1636798_at	2270.37	687.441	-3.30265	0	153	DEG	Group 3 vs 2	1636798_at	401.849	687.441	1.7107	0.000959049	790	DEG	1636798_at	CG13482	---	chr3L:14322536-14322845 (+) // 100.0 //	---	---	0005515 // protein binding // inferred from physical interaction
Group 2 vs 1	1634515_at	CG8093	FBgn0033999	2726.77	492.871	-5.53241	0	115	DEG	Group 3 vs 1	1634515_at	2726.77	2183.48	-1.24882	0.00262675	1505	DEG_FC<1.5/-1.667	Group 3 vs 2	1634515_at	492.871	2183.48	4.43013	0	84	DEG	1634515_at	CG8093	---	chr2R:11101836-11103105 (-) // 100.0 //	0006629 // lipid metabolic process // inferred from electronic annotation /// 0006629 // lipid metabolic process // inferred from sequence or structural similarity	---	0004806 // triacylglycerol lipase activity // inferred from sequence or structural similarity /// 0004806 // triacylglycerol lipase activity // inferred from electronic annotation /// 0016298 // lipase activity // inferred from sequence or structural similarity /// 0016787 // hydrolase activity // inferred from electronic annotation
Group 2 vs 1	1632080_s_at	Cpr67Fa1 /// Cpr67Fa2	FBgn0036108 /// FBgn0036109	1949.16	10714.5	5.49702	0	116	DEG	Group 3 vs 1	1632080_s_at	1949.16	7839.52	4.02201	0	122	DEG	Group 3 vs 2	1632080_s_at	10714.5	7839.52	-1.36673	0	552	DEG<1.5/-1.98	1632080_s_at	Cpr67Fa1 /// Cpr67Fa2	CG7941 /// CG18349	chr3L:10884842-10885616 (+) // 100.0 //	---	---	0005214 // structural constituent of chitin-based cuticle // inferred from sequence or structural similarity /// 0005515 // protein binding // inferred from physical interaction /// 0008010 // structural constituent of chitin-based larval cuticle // inferred from sequence or structural similarity /// 0042302 // structural constituent of cuticle // inferred from electronic annotation
Group 2 vs 1	1641052_at	Jon66Cii	FBgn0035887	14418.4	2663.8	-5.41273	0	117	DEG	Group 3 vs 1	1641052_at	14418.4	1713.72	-8.41353	0	66	DEG	Group 3 vs 2	1641052_at	2663.8	1713.72	-1.5544	0	419	DEG	1641052_at	Jon66Cii	Jonah 66C	chr3L:8385957-8386749 (-) // 100.0 //	0006508 // proteolysis // inferred from electronic annotation /// 0006508 // proteolysis // non-traceable author statement	---	0003824 // catalytic activity // inferred from electronic annotation /// 0004252 // serine-type endopeptidase activity // inferred from electronic annotation /// 0005515 // protein binding // inferred from physical interaction /// 0016787 // hydrolase activity // inferred from electronic annotation
Group 2 vs 1	1630238_at	CG11018 /// Lcp4	FBgn0002535	8649.59	1606.94	-5.38264	0	118	DEG	Group 3 vs 1	1630238_at	8649.59	4253.35	-2.0336	0	262	DEG	Group 3 vs 2	1630238_at	1606.94	4253.35	2.64686	0	155	DEG	1630238_at	CG11018 /// Lcp4	--- /// cuticle p. IV	chr2R:4325169-4325908 (+) // 100.0 //	---	---	0005198 // structural molecule activity // inferred from electronic annotation /// 0005214 // structural constituent of chitin-based cuticle // inferred from sequence or structural similarity /// 0008010 // structural constituent of chitin-based larval cuticle // non-traceable author statement /// 0042302 // structural constituent of cuticle // inferred from electronic annotation
Group 2 vs 1	1625195_s_at	shn	---	2350.87	437.338	-5.3754	0	119	DEG	Group 3 vs 1	1625195_s_at	2350.87	554.682	-4.23823	0	114	DEG	Group 3 vs 2	1625195_s_at	437.338	554.682	1.26831	0.00943849	1535	DEG<1.5/-1.646	1625195_s_at	shn	schnurri	chr2R:20615461-20622912 (+) // 98.84 // /// chr2R:6524177-6554159 (+) // 98.01 // /// chr2R:266977-274378 (+) // 97.82 // /// chr2R:6517276-6524619 (+) // 97.18 // /// chr3L:925230-932599 (+) // 97.3 // /// chr3L:2966777-2974144 (+) // 97.41 // /// chr3R:23999446-24006819 (+) // 97.54 // /// chr3R:5663884-5671249 (+) // 97.14 // /// chrX:21567779-21575665 (+) // 98.48 // /// chr3RHet:1982292-1989…	0000122 // negative regulation of transcription from RNA polymerase II promoter // non-traceable author statement /// 0001745 // compound eye morphogenesis // non-traceable author statement /// 0007179 // transforming growth factor beta receptor signaling pathway // non-traceable author statement /// 0007179 // transforming growth factor beta receptor signaling pathway // traceable author stateme…	0005622 // intracellular // inferred from electronic annotation /// 0005634 // nucleus // non-traceable author statement /// 0005783 // endoplasmic reticulum // inferred from electronic annotation /// 0005789 // endoplasmic reticulum membrane // inferred from electronic annotation /// 0005792 // microsome // non-traceable author statement /// 0005792 // microsome // inferred from electronic annot…	0003676 // nucleic acid binding // inferred from electronic annotation /// 0003700 // transcription factor activity // inferred from sequence or structural similarity /// 0003700 // transcription factor activity // non-traceable author statement /// 0003702 // RNA polymerase II transcription factor activity // inferred from mutant phenotype /// 0003702 // RNA polymerase II transcription factor ac…
Group 2 vs 1	1637155_at	CG32407	FBgn0052407	2350.75	437.947	-5.36766	0	120	DEG	Group 3 vs 1	1637155_at	2350.75	1638.76	-1.43447	0	447	DEG_FC<1.5/-1.43	Group 3 vs 2	1637155_at	437.947	1638.76	3.74192	0	101	DEG	1637155_at	CG32407	---	chr3L:5915154-5916670 (+) // 100.0 //	---	---	---
Group 2 vs 1	1624101_at	Cyp6a23	FBgn0033978	777.008	145.008	-5.35838	0	121	DEG	Group 3 vs 1	1624101_at	777.008	51.3977	-15.1176	0	46	DEG	Group 3 vs 2	1624101_at	145.008	51.3977	-2.8213	0.0364367	2343	DEG	1624101_at	Cyp6a23	Cyp6a23	chr2R:10763337-10765159 (+) // 100.0 //	0055114 // oxidation reduction // inferred from electronic annotation	0005783 // endoplasmic reticulum // inferred from electronic annotation /// 0005789 // endoplasmic reticulum membrane // inferred from electronic annotation /// 0005792 // microsome // non-traceable author statement /// 0005792 // microsome // inferred from electronic annotation /// 0016020 // membrane // non-traceable author statement /// 0016020 // membrane // inferred from electronic annotation	0004497 // monooxygenase activity // inferred from electronic annotation /// 0005506 // iron ion binding // inferred from electronic annotation /// 0009055 // electron carrier activity // inferred from electronic annotation /// 0009055 // electron carrier activity // inferred from sequence or structural similarity /// 0009055 // electron carrier activity // non-traceable author statement /// 0016…
Group 2 vs 1	1630212_at	CG2065	FBgn0033204	2579.42	485.583	-5.312	0	122	DEG	Group 3 vs 1	1630212_at	2579.42	370.097	-6.96958	0	73	DEG	Group 3 vs 2	1630212_at	485.583	370.097	-1.31204	0.0530373		nonDEG	1630212_at	CG2065	---	chr2R:3551290-3552774 (+) // 99.5 //	0008152 // metabolic process // inferred from electronic annotation /// 0055114 // oxidation reduction // inferred from electronic annotation	---	0003824 // catalytic activity // inferred from electronic annotation /// 0005488 // binding // inferred from electronic annotation /// 0016491 // oxidoreductase activity // inferred from electronic annotation
Group 2 vs 1	1623265_at	CG10513	FBgn0039311	182.199	933.12	5.12143	0	123	DEG	Group 3 vs 1	1623265_at	182.199	152.595	-1.194	0.181023		nonDEG	Group 3 vs 2	1623265_at	933.12	152.595	-6.115	0	57	DEG	1623265_at	CG10513	---	chr3R:21101513-21102967 (-) // 100.0 //	---	---	0005515 // protein binding // inferred from physical interaction
Group 2 vs 1	1633130_at	---	FBgn0054035	677.105	133.181	-5.08409	0	124	DEG	Group 3 vs 1	1633130_at	677.105	316.752	-2.13765	0	241	DEG	Group 3 vs 2	1633130_at	133.181	316.752	2.37835	0.00181246	957	DEG	1633130_at	---	---	chr3R:13238809-13240253 (+) // 100.0 //	---	---	---
Group 2 vs 1	1636764_at	CG31075 /// DsecCG31075	FBgn0051075	4193.24	837.96	-5.0041	0	125	DEG	Group 3 vs 1	1636764_at	4193.24	3960.32	-1.05881	0.0196146		nonDEG	Group 3 vs 2	1636764_at	837.96	3960.32	4.72614	0	73	DEG	1636764_at	CG31075 /// DsecCG31075	--- /// ---	chr3R:22811343-22814237 (-) // 100.0 //	0006090 // pyruvate metabolic process // inferred from sequence or structural similarity /// 0008152 // metabolic process // inferred from electronic annotation /// 0055114 // oxidation reduction // inferred from electronic annotation	0005739 // mitochondrion // inferred from sequence or structural similarity /// 0005759 // mitochondrial matrix // inferred from sequence or structural similarity	0004029 // aldehyde dehydrogenase (NAD) activity // inferred from sequence or structural similarity /// 0004029 // aldehyde dehydrogenase (NAD) activity // inferred from electronic annotation /// 0016491 // oxidoreductase activity // inferred from electronic annotation
Group 2 vs 1	1625884_at	CG13059	FBgn0036607	492.766	2365.86	4.80118	0	126	DEG	Group 3 vs 1	1625884_at	492.766	668.108	1.35583	0.0221815	1941	DEG_FC<1.5/-1.2065	Group 3 vs 2	1625884_at	2365.86	668.108	-3.54113	0	104	DEG	1625884_at	CG13059	---	chr3L:16316830-16317363 (+) // 100.0 //	---	---	---
Group 2 vs 1	1633268_s_at	Nha1	FBgn0031865	295.709	1402.61	4.74322	0	127	DEG	Group 3 vs 1	1633268_s_at	295.709	1223.17	4.13639	0	118	DEG	Group 3 vs 2	1633268_s_at	1402.61	1223.17	-1.14671	0.0291036		nonDEG	1633268_s_at	Nha1	serine protease	chr2L:6860902-6870387 (-) // 100.0 //	0006810 // transport // inferred from electronic annotation /// 0006885 // regulation of pH // inferred from electronic annotation	0016021 // integral to membrane // inferred from electronic annotation	0005515 // protein binding // inferred from physical interaction /// 0015299 // solute:hydrogen antiporter activity // inferred from electronic annotation /// 0015385 // sodium:hydrogen antiporter activity // inferred from sequence or structural similarity
Group 2 vs 1	1634998_at	CG9269	FBgn0038161	216.978	972.844	4.48361	0	128	DEG	Group 3 vs 1	1634998_at	216.978	605.005	2.78833	0	179	DEG	Group 3 vs 2	1634998_at	972.844	605.005	-1.60799	0.00299187	1099	DEG	1634998_at	CG9269	---	chr3R:9441725-9442166 (+) // 100.0 //	---	---	0005515 // protein binding // inferred from physical interaction
Group 2 vs 1	1635045_at	CG6271	FBgn0039476	612.689	137.266	-4.46352	0	129	DEG	Group 3 vs 1	1635045_at	612.689	2036.74	3.32427	0	151	DEG	Group 3 vs 2	1635045_at	137.266	2036.74	14.8379	0	35	DEG	1635045_at	CG6271	---	chr3R:22850682-22851822 (-) // 100.0 //	0006629 // lipid metabolic process // inferred from electronic annotation /// 0016042 // lipid catabolic process // inferred from electronic annotation	0005576 // extracellular region // inferred from electronic annotation	0003824 // catalytic activity // inferred from electronic annotation /// 0004806 // triacylglycerol lipase activity // inferred from sequence or structural similarity /// 0008970 // phospholipase A1 activity // inferred from electronic annotation /// 0016787 // hydrolase activity // inferred from electronic annotation
Group 2 vs 1	1631258_at	CG30005	FBgn0050005	527.853	120.78	-4.37037	0	130	DEG	Group 3 vs 1	1631258_at	527.853	113.184	-4.66368	0	101	DEG	Group 3 vs 2	1631258_at	120.78	113.184	-1.06711			nonDEG	1631258_at	CG30005	---	chr2R:5494805-5495536 (+) // 100.0 //	---	---	---
Group 2 vs 1	1625417_s_at	CG14374 /// CG14377	FBgn0038148 /// FBgn0040553	528.109	2305.81	4.36615	0	131	DEG	Group 3 vs 1	1625417_s_at	528.109	512.686	-1.03008	0.151605		nonDEG	Group 3 vs 2	1625417_s_at	2305.81	512.686	-4.4975	0	82	DEG	1625417_s_at	CG14374 /// CG14377	--- /// ---	chr3R:9223588-9223906 (+) // 100.0 // /// chr3R:9222530-9222830 (-) // 92.45 //	---	---	0005515 // protein binding // inferred from physical interaction
Group 2 vs 1	1631695_at	CG13066	FBgn0040797	581.816	2530.1	4.34863	0	132	DEG	Group 3 vs 1	1631695_at	581.816	1042.95	1.79258	0	302	DEG	Group 3 vs 2	1631695_at	2530.1	1042.95	-2.42591	0	174	DEG	1631695_at	CG13066	---	chr3L:16266259-16266547 (+) // 100.0 //	---	---	0005515 // protein binding // inferred from physical interaction
Group 2 vs 1	1628272_a_at	CG12466 /// CG40486	FBgn0069972	821.575	192.68	-4.26394	0	133	DEG	Group 3 vs 1	1628272_a_at	821.575	239.676	-3.42785	0	143	DEG	Group 3 vs 2	1628272_a_at	192.68	239.676	1.24391	0.103955		nonDEG	1628272_a_at	CG12466 /// CG40486	--- /// ---	chrX:22360709-22361912 (-) // 100.0 //	0008152 // metabolic process // inferred from electronic annotation /// 0055114 // oxidation reduction // inferred from electronic annotation	---	0003824 // catalytic activity // inferred from electronic annotation /// 0005488 // binding // inferred from electronic annotation /// 0016491 // oxidoreductase activity // inferred from sequence or structural similarity /// 0016491 // oxidoreductase activity // inferred from electronic annotation /// 0016616 // oxidoreductase activity, acting on the CH-OH group of donors, NAD or NADP as acceptor…
Group 2 vs 1	1641622_at	Lcp65Ae	FBgn0020640	2938.76	12526.4	4.26249	0	134	DEG	Group 3 vs 1	1641622_at	2938.76	10865.4	3.69729	0	134	DEG	Group 3 vs 2	1641622_at	12526.4	10865.4	-1.15287	0		nonDEG	1641622_at	Lcp65Ae	Lcp65Ae	chr3L:6130818-6131178 (-) // 100.0 //	---	---	0005214 // structural constituent of chitin-based cuticle // inferred from sequence or structural similarity /// 0008010 // structural constituent of chitin-based larval cuticle // inferred from sequence or structural similarity /// 0042302 // structural constituent of cuticle // inferred from electronic annotation
Group 2 vs 1	1625050_s_at	---	---	579.23	2462.07	4.25059	0	135	DEG	Group 3 vs 1	1625050_s_at	579.23	2634.2	4.54776	0	102	DEG	Group 3 vs 2	1625050_s_at	2462.07	2634.2	1.06991	0.0303027		nonDEG	1625050_s_at	---	---	chr3LHet:854127-858777 (+) // 99.78 // /// chr3RHet:58477-70452 (+) // 94.92 // /// chrYHet:71750-76355 (+) // 97.65 // /// chr3R:4724498-4729146 (+) // 98.99 // /// chrU:1140162-1144473 (+) // 90.71 // /// chrU:7859656-9774001 (+) // 90.43 // /// chr2RHet:2086342-2090922 (-) // 95.91 // /// chr2RHet:2090586-2094183 (-) // 75.11 // /// chr2R:2234453-2239101 (-) // 98.95 // /// chrU:1092986-109765…	0015074 // DNA integration // inferred from electronic annotation	---	0003676 // nucleic acid binding // inferred from electronic annotation /// 0003677 // DNA binding // inferred from electronic annotation /// 0004190 // aspartic-type endopeptidase activity // inferred from electronic annotation /// 0008233 // peptidase activity // inferred from electronic annotation /// 0008270 // zinc ion binding // inferred from electronic annotation /// 0016787 // hydrolase ac…
Group 2 vs 1	1625698_at	CG6639 /// RSG7	FBgn0032638	1311.73	311.929	-4.20522	0	136	DEG	Group 3 vs 1	1625698_at	1311.73	260.246	-5.04034	0	94	DEG	Group 3 vs 2	1625698_at	311.929	260.246	-1.19859	0.00945633		nonDEG	1625698_at	CG6639 /// RSG7	--- /// Regulator of G-protein signalling 7	chr2L:17454253-17455917 (-) // 100.0 //	0006508 // proteolysis // inferred from electronic annotation /// 0007186 // G-protein coupled receptor protein signaling pathway // inferred from electronic annotation /// 0007242 // intracellular signaling cascade // inferred from electronic annotation /// 0008277 // regulation of G-protein coupled receptor protein signaling pathway // inferred from sequence or structural similarity	0005834 // heterotrimeric G-protein complex // inferred from electronic annotation	0003824 // catalytic activity // inferred from electronic annotation /// 0004252 // serine-type endopeptidase activity // inferred from electronic annotation /// 0004252 // serine-type endopeptidase activity // non-traceable author statement /// 0004871 // signal transducer activity // inferred from electronic annotation /// 0016299 // regulator of G-protein signaling activity // inferred from se…
Group 2 vs 1	1629118_at	PGRP-SC2	FBgn0043575	1495.99	6217.39	4.15602	0	137	DEG	Group 3 vs 1	1629118_at	1495.99	7328.58	4.8988	0	98	DEG	Group 3 vs 2	1629118_at	6217.39	7328.58	1.17872	0		nonDEG	1629118_at	PGRP-SC2	PGRP-SC2	chr2R:4604471-4605026 (+) // 100.0 //	0006952 // defense response // non-traceable author statement /// 0006955 // immune response // inferred from sequence or structural similarity /// 0006955 // immune response // inferred from electronic annotation /// 0009253 // peptidoglycan catabolic process // inferred from sequence or structural similarity /// 0009253 // peptidoglycan catabolic process // inferred from electronic annotation /…	0005576 // extracellular region // inferred from sequence or structural similarity /// 0005576 // extracellular region // inferred from electronic annotation /// 0005887 // integral to plasma membrane // non-traceable author statement	0005515 // protein binding // inferred from electronic annotation /// 0008270 // zinc ion binding // inferred from electronic annotation /// 0008745 // N-acetylmuramoyl-L-alanine amidase activity // inferred from electronic annotation /// 0016787 // hydrolase activity // inferred from electronic annotation /// 0042834 // peptidoglycan binding // inferred from sequence or structural similarity ///…
Group 2 vs 1	1623491_at	CG15155	FBgn0032669	974.957	235.135	-4.14636	0	138	DEG	Group 3 vs 1	1623491_at	974.957	153.274	-6.36089	0	79	DEG	Group 3 vs 2	1623491_at	235.135	153.274	-1.53409	0.102293		nonDEG	1623491_at	CG15155	---	chr2L:18154865-18155825 (+) // 100.0 //	0008152 // metabolic process // inferred from electronic annotation	---	0008080 // N-acetyltransferase activity // inferred from electronic annotation
Group 2 vs 1	1633857_at	CG13659	FBgn0039319	657.764	158.654	-4.14589	0	139	DEG	Group 3 vs 1	1633857_at	657.764	111.93	-5.87654	0	81	DEG	Group 3 vs 2	1633857_at	158.654	111.93	-1.41744	0.10047		nonDEG	1633857_at	CG13659	---	chr3R:21126632-21128012 (+) // 100.0 //	---	---	0005515 // protein binding // inferred from physical interaction
Group 2 vs 1	1629486_at	Ccp84Ag	FBgn0004777	527.698	2133.09	4.04226	0	140	DEG	Group 3 vs 1	1629486_at	527.698	609.029	1.15412	0.175171		nonDEG	Group 3 vs 2	1629486_at	2133.09	609.029	-3.50245	0	105	DEG	1629486_at	Ccp84Ag	cuticle cluster 2	chr3R:2512449-2513762 (+) // 100.0 //	---	---	0005214 // structural constituent of chitin-based cuticle // inferred from sequence or structural similarity /// 0008010 // structural constituent of chitin-based larval cuticle // inferred from sequence or structural similarity /// 0042302 // structural constituent of cuticle // inferred from electronic annotation
Group 2 vs 1	1630065_at	CG6912	FBgn0038290	951.828	238.394	-3.99266	0	141	DEG	Group 3 vs 1	1630065_at	951.828	176.761	-5.38485	0	88	DEG	Group 3 vs 2	1630065_at	238.394	176.761	-1.34868	0.12195		nonDEG	1630065_at	CG6912	---	chr3R:10960859-10962702 (-) // 100.0 //	---	---	0005515 // protein binding // inferred from physical interaction
Group 2 vs 1	1638466_a_at	Irk2	FBgn0039081	850.471	3386.25	3.98162	0	142	DEG	Group 3 vs 1	1638466_a_at	850.471	2290.41	2.69311	0	185	DEG	Group 3 vs 2	1638466_a_at	3386.25	2290.41	-1.47845	0	472	DEG<1.5/-1.18	1638466_a_at	Irk2	Inwardly rectifying potassium channel 2	chr3R:19339689-19345167 (-) // 100.0 //	0006810 // transport // inferred from electronic annotation /// 0006811 // ion transport // inferred from electronic annotation /// 0006813 // potassium ion transport // inferred from electronic annotation	0016020 // membrane // inferred from electronic annotation /// 0016021 // integral to membrane // inferred from electronic annotation	0005216 // ion channel activity // inferred from electronic annotation /// 0005242 // inward rectifier potassium channel activity // non-traceable author statement /// 0005242 // inward rectifier potassium channel activity // inferred from electronic annotation /// 0005244 // voltage-gated ion channel activity // inferred from electronic annotation /// 0015467 // G-protein activated inward rectif…
Group 2 vs 1	1625688_at	CG6293	FBgn0037807	625.809	160.127	-3.90821	0	143	DEG	Group 3 vs 1	1625688_at	625.809	97.0528	-6.44813	0	78	DEG	Group 3 vs 2	1625688_at	160.127	97.0528	-1.64989	0.0586219		nonDEG	1625688_at	CG6293	---	chr3R:6133983-6137317 (-) // 100.0 //	0006810 // transport // inferred from electronic annotation	0016020 // membrane // inferred from electronic annotation	0005215 // transporter activity // inferred from electronic annotation /// 0005515 // protein binding // inferred from physical interaction /// 0008520 // L-ascorbate:sodium symporter activity // inferred from sequence or structural similarity
Group 2 vs 1	1638733_at	CG3984	FBgn0038291	2700.58	696.241	-3.8788	0	144	DEG	Group 3 vs 1	1638733_at	2700.58	608.653	-4.43697	0	106	DEG	Group 3 vs 2	1638733_at	696.241	608.653	-1.1439	0.109766		nonDEG	1638733_at	CG3984	---	chr3R:10962883-10964626 (+) // 100.0 //	---	---	---
Group 2 vs 1	1623536_s_at	CG11347	FBgn0035542	605.361	164.012	-3.69095	0	145	DEG	Group 3 vs 1	1623536_s_at	605.361	530.812	-1.14044	0.0845964		nonDEG	Group 3 vs 2	1623536_s_at	164.012	530.812	3.23642	0	114	DEG	1623536_s_at	CG11347	---	chr3L:4407144-4420266 (+) // 100.0 //	---	---	0005515 // protein binding // inferred from physical interaction
Group 2 vs 1	1630126_at	TwdlO	FBgn0039438	1343.17	4876.21	3.63038	0	146	DEG	Group 3 vs 1	1630126_at	1343.17	1778.51	1.32411	0.00468937	1564	DEG_FC<1.5/-1.1051	Group 3 vs 2	1630126_at	4876.21	1778.51	-2.74174	0	148	DEG	1630126_at	TwdlO	CG6452	chr3R:22451729-22452419 (-) // 100.0 //	---	---	---
Group 2 vs 1	1636793_at	Cyp4d2	FBgn0011576	753.524	208.041	-3.622	0	147	DEG	Group 3 vs 1	1636793_at	753.524	548.557	-1.37365	0.0122851	1776	DEG_FC<1.5/-1.1378	Group 3 vs 2	1636793_at	208.041	548.557	2.63678	0	156	DEG	1636793_at	Cyp4d2	Cytochrome P450 4D2	chrX:2070923-2072767 (+) // 100.0 //	0055114 // oxidation reduction // inferred from electronic annotation	0005783 // endoplasmic reticulum // inferred from electronic annotation /// 0005789 // endoplasmic reticulum membrane // inferred from electronic annotation /// 0005792 // microsome // non-traceable author statement /// 0005792 // microsome // inferred from electronic annotation /// 0016020 // membrane // non-traceable author statement /// 0016020 // membrane // inferred from electronic annotation	0004497 // monooxygenase activity // inferred from electronic annotation /// 0005506 // iron ion binding // inferred from electronic annotation /// 0009055 // electron carrier activity // inferred from electronic annotation /// 0009055 // electron carrier activity // inferred from sequence or structural similarity /// 0009055 // electron carrier activity // non-traceable author statement /// 0016…
Group 2 vs 1	1626142_at	Lcp65Af	FBgn0020639	1261.57	4524.64	3.5865	0	148	DEG	Group 3 vs 1	1626142_at	1261.57	1524.23	1.2082	0.0108891	1746	DEG_FC<1.5/-1.1525	Group 3 vs 2	1626142_at	4524.64	1524.23	-2.96847	0	130	DEG	1626142_at	Lcp65Af	Lcp65Af	chr3L:6129403-6129871 (-) // 100.0 //	---	---	0005214 // structural constituent of chitin-based cuticle // inferred from sequence or structural similarity /// 0008010 // structural constituent of chitin-based larval cuticle // inferred from sequence or structural similarity /// 0042302 // structural constituent of cuticle // inferred from electronic annotation
Group 2 vs 1	1623130_at	CG30457	FBgn0050457	1222.49	4372.58	3.57678	0	149	DEG	Group 3 vs 1	1623130_at	1222.49	2471.17	2.02142	0	264	DEG	Group 3 vs 2	1623130_at	4372.58	2471.17	-1.76944	0	319	DEG	1623130_at	CG30457	---	chr2R:13047658-13048330 (-) // 100.0 //	---	---	0045735 // nutrient reservoir activity // inferred from electronic annotation
Group 2 vs 1	1631522_x_at	CG15213	FBgn0040843	452.868	1607.64	3.5499	0	150	DEG	Group 3 vs 1	1631522_x_at	452.868	872.745	1.92715	0	281	DEG	Group 3 vs 2	1631522_x_at	1607.64	872.745	-1.84205	0	293	DEG	1631522_x_at	CG15213	---	chr3L:5125997-5126245 (-) // 100.0 //	---	---	---
Group 2 vs 1	1638051_at	CG17323	FBgn0032713	395.201	1398.46	3.5386	0	151	DEG	Group 3 vs 1	1638051_at	395.201	622.036	1.57397	0.00562641	918	DEG	Group 3 vs 2	1638051_at	1398.46	622.036	-2.2482	0.00113898	871	DEG	1638051_at	CG17323	---	chr2L:18824299-18826554 (+) // 98.76 //	0008152 // metabolic process // inferred from electronic annotation	---	0015020 // glucuronosyltransferase activity // inferred from sequence or structural similarity /// 0015020 // glucuronosyltransferase activity // inferred from electronic annotation /// 0016740 // transferase activity // inferred from electronic annotation /// 0016757 // transferase activity, transferring glycosyl groups // inferred from electronic annotation /// 0016758 // transferase activity, …
Group 2 vs 1	1633428_at	prc	FBgn0028573	536.329	1890.85	3.52554	0	152	DEG	Group 3 vs 1	1633428_at	536.329	859.266	1.60213	0.0075958	960	DEG	Group 3 vs 2	1633428_at	1890.85	859.266	-2.20054	0	204	DEG	1633428_at	prc	Pericardin	chr3L:11951972-11959231 (-) // 100.0 //	0002009 // morphogenesis of an epithelium // traceable author statement /// 0007507 // heart development // inferred from mutant phenotype /// 0007507 // heart development // traceable author statement /// 0016477 // cell migration // traceable author statement /// 0035088 // establishment or maintenance of apical/basal cell polarity // traceable author statement	0005578 // proteinaceous extracellular matrix // inferred from direct assay /// 0005605 // basal lamina // non-traceable author statement	---
Group 2 vs 1	1633196_at	alpha-Est2	FBgn0015570	1344.95	386.625	-3.47869	0	153	DEG	Group 3 vs 1	1633196_at	1344.95	711.257	-1.89095	0	285	DEG	Group 3 vs 2	1633196_at	386.625	711.257	1.83966	0	294	DEG	1633196_at	alpha-Est2	fragment B	chr3R:3368465-3370956 (+) // 100.0 //	---	0005811 // lipid particle // inferred from direct assay	0004091 // carboxylesterase activity // inferred from sequence or structural similarity /// 0004091 // carboxylesterase activity // non-traceable author statement /// 0004091 // carboxylesterase activity // inferred from electronic annotation /// 0004104 // cholinesterase activity // inferred from electronic annotation /// 0016787 // hydrolase activity // inferred from electronic annotation
Group 2 vs 1	1641722_at	Reg-2	FBgn0016715	2184.24	630.531	-3.46412	0	154	DEG	Group 3 vs 1	1641722_at	2184.24	1463.73	-1.49224	0	411	DEG_FC<1.5/-1.7	Group 3 vs 2	1641722_at	630.531	1463.73	2.32142	0	187	DEG	1641722_at	Reg-2	rhythmically expressed gene 2	chr3L:605164-606558 (-) // 100.0 //	0008152 // metabolic process // inferred from electronic annotation	---	0003824 // catalytic activity // inferred from electronic annotation /// 0008967 // phosphoglycolate phosphatase activity // inferred from electronic annotation /// 0016787 // hydrolase activity // inferred from electronic annotation
Group 2 vs 1	1633476_at	Acox57D-d	FBgn0034629	397.749	1370.51	3.44567	0	155	DEG	Group 3 vs 1	1633476_at	397.749	1521.21	3.82456	0	130	DEG	Group 3 vs 2	1633476_at	1370.51	1521.21	1.10996	0.0222164		nonDEG	1633476_at	Acox57D-d	acyl co-enzyme A oxidase	chr2R:17276894-17279945 (+) // 100.0 //	0006631 // fatty acid metabolic process // inferred from electronic annotation /// 0006635 // fatty acid beta-oxidation // inferred from electronic annotation /// 0008152 // metabolic process // inferred from electronic annotation /// 0055114 // oxidation reduction // inferred from electronic annotation	0005777 // peroxisome // inferred from sequence or structural similarity /// 0005777 // peroxisome // inferred from electronic annotation	0003995 // acyl-CoA dehydrogenase activity // inferred from electronic annotation /// 0003997 // acyl-CoA oxidase activity // inferred from sequence or structural similarity /// 0003997 // acyl-CoA oxidase activity // inferred from electronic annotation /// 0009055 // electron carrier activity // inferred from electronic annotation /// 0016401 // palmitoyl-CoA oxidase activity // inferred from se…
Group 2 vs 1	1637963_at	CG14191 /// DmauCG14191 /// DsimCG14191	FBgn0030981	367.907	1247.8	3.39161	0	156	DEG	Group 3 vs 1	1637963_at	367.907	662.509	1.80075	0.00369236	865	DEG	Group 3 vs 2	1637963_at	1247.8	662.509	-1.88344	0.00223721	1019	DEG	1637963_at	CG14191 /// DmauCG14191 /// DsimCG14191	--- /// --- /// ---	chrX:18975699-18976606 (+) // 100.0 //	---	---	0005515 // protein binding // inferred from physical interaction
Group 2 vs 1	1623817_at	CG7916	FBgn0028534	9826.01	2898.35	-3.39021	0	157	DEG	Group 3 vs 1	1623817_at	9826.01	7110.31	-1.38194	0	488	DEG_FC<1.5/-1.84	Group 3 vs 2	1623817_at	2898.35	7110.31	2.45323	0	169	DEG	1623817_at	CG7916	---	chr2L:13846756-13847800 (+) // 100.0 //	---	---	0005515 // protein binding // inferred from physical interaction
Group 2 vs 1	1640565_at	PebIII	FBgn0011695	1000.81	3369.64	3.36691	0	158	DEG	Group 3 vs 1	1640565_at	1000.81	2378.46	2.37653	0	214	DEG	Group 3 vs 2	1640565_at	3369.64	2378.46	-1.41673	0.00220176	1011	DEG<1.5/-1.169	1640565_at	PebIII	Pherokine 2	chr2R:19914055-19915040 (+) // 100.0 //	0007552 // metamorphosis // inferred from expression pattern /// 0007610 // behavior // inferred from electronic annotation /// 0009615 // response to virus // inferred from expression pattern /// 0045297 // post-mating behavior // inferred from sequence or structural similarity	0005576 // extracellular region // inferred from sequence or structural similarity /// 0005576 // extracellular region // inferred from electronic annotation /// 0005576 // extracellular region // non-traceable author statement	0005515 // protein binding // inferred from physical interaction
Group 2 vs 1	1624468_a_at	CG10026	FBgn0032785	727.344	217.039	-3.35122	0	159	DEG	Group 3 vs 1	1624468_a_at	727.344	637.089	-1.14167	0.0499827		nonDEG	Group 3 vs 2	1624468_a_at	217.039	637.089	2.93537	0	133	DEG	1624468_a_at	CG10026	---	chr2L:19455677-19457724 (+) // 100.0 //	0006810 // transport // inferred from electronic annotation	0005622 // intracellular // inferred from electronic annotation	0005215 // transporter activity // inferred from electronic annotation /// 0008431 // vitamin E binding // inferred from sequence or structural similarity /// 0016918 // retinal binding // inferred from sequence or structural similarity
Group 2 vs 1	1627583_at	CG15213	FBgn0040843	439.434	1465.58	3.33514	0	160	DEG	Group 3 vs 1	1627583_at	439.434	779.774	1.7745	0.00114512	714	DEG	Group 3 vs 2	1627583_at	1465.58	779.774	-1.87949	0	283	DEG	1627583_at	CG15213	---	chr3L:5125997-5126245 (-) // 100.0 //	---	---	---
Group 2 vs 1	1636583_at	CG5932	FBgn0036996	8111.87	2453.18	-3.30667	0	161	DEG	Group 3 vs 1	1636583_at	8111.87	5576.69	-1.4546	0	431	DEG_FC<1.5/-1.27	Group 3 vs 2	1636583_at	2453.18	5576.69	2.27324	0	192	DEG	1636583_at	CG5932	---	chr3L:20453798-20455374 (+) // 100.0 //	0006629 // lipid metabolic process // inferred from electronic annotation	---	0004806 // triacylglycerol lipase activity // inferred from sequence or structural similarity /// 0004806 // triacylglycerol lipase activity // inferred from electronic annotation /// 0016787 // hydrolase activity // inferred from electronic annotation
Group 2 vs 1	1638903_at	CG5724	FBgn0038082	2642.36	803.814	-3.28727	0	162	DEG	Group 3 vs 1	1638903_at	2642.36	151.918	-17.3934	0	44	DEG	Group 3 vs 2	1638903_at	803.814	151.918	-5.29112	0	66	DEG	1638903_at	CG5724	---	chr3R:8565383-8567042 (+) // 100.0 //	0008152 // metabolic process // inferred from electronic annotation	---	0005515 // protein binding // inferred from physical interaction /// 0015020 // glucuronosyltransferase activity // inferred from sequence or structural similarity /// 0015020 // glucuronosyltransferase activity // inferred from electronic annotation /// 0016740 // transferase activity // inferred from electronic annotation /// 0016757 // transferase activity, transferring glycosyl groups // infe…
Group 2 vs 1	1627352_at	Oat	FBgn0022774	2091.19	638.077	-3.27733	0	163	DEG	Group 3 vs 1	1627352_at	2091.19	1614.97	-1.29488	0.00421761	1548	DEG_FC<1.5/-1.866	Group 3 vs 2	1627352_at	638.077	1614.97	2.531	0	162	DEG	1627352_at	Oat	Ornithine aminotransferase precursor	chr3L:19640375-19642949 (-) // 100.0 //	0006591 // ornithine metabolic process // inferred from sequence or structural similarity /// 0006591 // ornithine metabolic process // non-traceable author statement	0005739 // mitochondrion // inferred from direct assay /// 0005739 // mitochondrion // inferred from electronic annotation /// 0005759 // mitochondrial matrix // inferred from sequence or structural similarity /// 0005759 // mitochondrial matrix // non-traceable author statement /// 0005759 // mitochondrial matrix // inferred from electronic annotation	0003824 // catalytic activity // inferred from electronic annotation /// 0004587 // ornithine-oxo-acid transaminase activity // inferred from sequence or structural similarity /// 0004587 // ornithine-oxo-acid transaminase activity // non-traceable author statement /// 0004587 // ornithine-oxo-acid transaminase activity // inferred from electronic annotation /// 0008483 // transaminase activity /…
Group 2 vs 1	1624057_at	CG16713	FBgn0031560	877.435	2874.56	3.27609	0	164	DEG	Group 3 vs 1	1624057_at	877.435	2792.4	3.18246	0	156	DEG	Group 3 vs 2	1624057_at	2874.56	2792.4	-1.02942	0.0938788		nonDEG	1624057_at	CG16713	---	chr2L:3695027-3695406 (-) // 100.0 //	---	---	0004867 // serine-type endopeptidase inhibitor activity // inferred from sequence or structural similarity /// 0004867 // serine-type endopeptidase inhibitor activity // inferred from electronic annotation
Group 2 vs 1	1640975_at	Lcp65Ag2	FBgn0020637	1651.78	5365.74	3.24846	0	165	DEG	Group 3 vs 1	1640975_at	1651.78	1985.02	1.20175	0.00803123	1675	DEG_FC<1.5/-1.1325	Group 3 vs 2	1640975_at	5365.74	1985.02	-2.70311	0	150	DEG	1640975_at	Lcp65Ag2	Lcp65Ag2	chr3L:6126088-6126700 (-) // 100.0 //	0008363 // larval chitin-based cuticle development // non-traceable author statement	0005576 // extracellular region // non-traceable author statement	0005198 // structural molecule activity // inferred from electronic annotation /// 0005214 // structural constituent of chitin-based cuticle // inferred from sequence or structural similarity /// 0005515 // protein binding // inferred from physical interaction /// 0008010 // structural constituent of chitin-based larval cuticle // inferred from sequence or structural similarity /// 0008010 // str…
Group 2 vs 1	1630066_at	CG4302 /// DsecCG4302	FBgn0027073	343.129	1099.95	3.20564	0	166	DEG	Group 3 vs 1	1630066_at	343.129	972.442	2.83404	0	176	DEG	Group 3 vs 2	1630066_at	1099.95	972.442	-1.13112	0.0385563		nonDEG	1630066_at	CG4302 /// DsecCG4302	--- /// ---	chr2R:17100382-17102473 (-) // 100.0 //	0008152 // metabolic process // inferred from electronic annotation	---	0005515 // protein binding // inferred from physical interaction /// 0015020 // glucuronosyltransferase activity // inferred from sequence or structural similarity /// 0015020 // glucuronosyltransferase activity // inferred from electronic annotation /// 0016740 // transferase activity // inferred from electronic annotation /// 0016757 // transferase activity, transferring glycosyl groups // infe…
Group 2 vs 1	1628364_at	CG7968	FBgn0028532	5993.36	1872.49	-3.20075	0	167	DEG	Group 3 vs 1	1628364_at	5993.36	2751.19	-2.17846	0	237	DEG	Group 3 vs 2	1628364_at	1872.49	2751.19	1.46927	0	478	DEG<1.5/-1.24	1628364_at	CG7968	---	chr2L:13849411-13850327 (+) // 100.0 //	---	---	---
Group 2 vs 1	1623521_at	---	FBgn0039330	1096.54	342.734	-3.19939	0	168	DEG	Group 3 vs 1	1623521_at	1096.54	1055.53	-1.03885	0.182583		nonDEG	Group 3 vs 2	1623521_at	342.734	1055.53	3.07974	0	124	DEG	1623521_at	---	---	chr3R:21170577-21172634 (-) // 100.0 //	0005975 // carbohydrate metabolic process // inferred from electronic annotation /// 0008152 // metabolic process // inferred from electronic annotation	0017177 // alpha-glucosidase II complex // inferred from sequence or structural similarity	0004553 // hydrolase activity, hydrolyzing O-glycosyl compounds // inferred from electronic annotation /// 0004558 // alpha-glucosidase activity // inferred from sequence or structural similarity /// 0004558 // alpha-glucosidase activity // inferred from electronic annotation /// 0016787 // hydrolase activity // inferred from electronic annotation /// 0016798 // hydrolase activity, acting on glyc…
Group 2 vs 1	1639737_at	CG34330	FBgn0085359	4800.97	1501.69	-3.19704	0	169	DEG	Group 3 vs 1	1639737_at	4800.97	4405.55	-1.08976	0.0041808		nonDEG	Group 3 vs 2	1639737_at	1501.69	4405.55	2.93372	0	135	DEG	1639737_at	CG34330	---	chrX:18962292-18962945 (-) // 100.0 //	---	---	---
Group 2 vs 1	1639364_at	Jon44E	FBgn0001285	4257.17	1331.62	-3.19699	0	170	DEG	Group 3 vs 1	1639364_at	4257.17	1197.5	-3.55504	0	140	DEG	Group 3 vs 2	1639364_at	1331.62	1197.5	-1.11199	0.0370346		nonDEG	1639364_at	Jon44E	Jonah 43E	chr2R:4578954-4579856 (+) // 100.0 //	0006508 // proteolysis // inferred from electronic annotation /// 0006508 // proteolysis // non-traceable author statement	---	0003824 // catalytic activity // inferred from electronic annotation /// 0004252 // serine-type endopeptidase activity // inferred from electronic annotation /// 0008233 // peptidase activity // inferred from electronic annotation /// 0016787 // hydrolase activity // inferred from electronic annotation
Group 2 vs 1	1635525_at	CG9672	FBgn0030777	4287.82	1346.68	-3.184	0	171	DEG	Group 3 vs 1	1635525_at	4287.82	2753.29	-1.55734	0	386	DEG	Group 3 vs 2	1635525_at	1346.68	2753.29	2.04451	0	239	DEG	1635525_at	CG9672	---	chrX:16600003-16600903 (-) // 100.0 //	0006508 // proteolysis // inferred from electronic annotation	---	0003824 // catalytic activity // inferred from electronic annotation /// 0004252 // serine-type endopeptidase activity // inferred from electronic annotation /// 0004252 // serine-type endopeptidase activity // non-traceable author statement
Group 2 vs 1	1625739_at	CG3292	FBgn0034710	4188.09	1317.53	-3.17875	0	172	DEG	Group 3 vs 1	1625739_at	4188.09	567.862	-7.37519	0	72	DEG	Group 3 vs 2	1625739_at	1317.53	567.862	-2.32015	0	188	DEG	1625739_at	CG3292	---	chr2R:18091198-18093081 (-) // 100.0 //	0008152 // metabolic process // inferred from electronic annotation	---	0000287 // magnesium ion binding // inferred from electronic annotation /// 0003824 // catalytic activity // inferred from electronic annotation /// 0004035 // alkaline phosphatase activity // inferred from sequence or structural similarity /// 0004035 // alkaline phosphatase activity // inferred from electronic annotation /// 0008270 // zinc ion binding // inferred from electronic annotation ///…
Group 2 vs 1	1635498_at	CG9259	FBgn0032913	1938.75	612.703	-3.16425	0	173	DEG	Group 3 vs 1	1635498_at	1938.75	549.301	-3.52948	0	142	DEG	Group 3 vs 2	1635498_at	612.703	549.301	-1.11542	0.180131		nonDEG	1635498_at	CG9259	---	chr2L:21089566-21090835 (+) // 100.0 //	---	---	0005515 // protein binding // inferred from physical interaction
Group 2 vs 1	1639903_at	Ser6	FBgn0011834	562.256	1765.49	3.14002	0	174	DEG	Group 3 vs 1	1639903_at	562.256	1167.9	2.07717	0	252	DEG	Group 3 vs 2	1639903_at	1765.49	1167.9	-1.51168	0	444	DEG	1639903_at	Ser6	Serine protease 6	chrX:20833629-20834528 (-) // 100.0 //	0006508 // proteolysis // inferred from electronic annotation /// 0006508 // proteolysis // non-traceable author statement	---	0003824 // catalytic activity // inferred from electronic annotation /// 0004252 // serine-type endopeptidase activity // inferred from electronic annotation /// 0004252 // serine-type endopeptidase activity // non-traceable author statement /// 0008233 // peptidase activity // inferred from electronic annotation /// 0008236 // serine-type peptidase activity // non-traceable author statement
Group 2 vs 1	1633002_at	salt	FBgn0039872	1103.4	353.718	-3.11943	0	175	DEG	Group 3 vs 1	1633002_at	1103.4	362.62	-3.04284	0	164	DEG	Group 3 vs 2	1633002_at	353.718	362.62	1.02517			nonDEG	1633002_at	salt	salty dog	chr3R:27577538-27580413 (-) // 99.62 //	0006810 // transport // inferred from electronic annotation /// 0006811 // ion transport // inferred from electronic annotation /// 0006814 // sodium ion transport // inferred from electronic annotation	0016020 // membrane // inferred from electronic annotation /// 0016021 // integral to membrane // inferred from electronic annotation	0005215 // transporter activity // inferred from electronic annotation /// 0008507 // sodium:iodide symporter activity // inferred from sequence or structural similarity
Group 2 vs 1	1631701_a_at	Cpr49Ac	FBgn0033725	1116.68	362.125	-3.08367	0	176	DEG	Group 3 vs 1	1631701_a_at	1116.68	1499.46	1.34279	0.0142482	1808	DEG_FC<1.5/-1.1688	Group 3 vs 2	1631701_a_at	362.125	1499.46	4.14071	0	87	DEG	1631701_a_at	Cpr49Ac	CG8502	chr2R:8274483-8277564 (+) // 100.0 //	---	---	0005214 // structural constituent of chitin-based cuticle // inferred from sequence or structural similarity /// 0008010 // structural constituent of chitin-based larval cuticle // inferred from sequence or structural similarity /// 0042302 // structural constituent of cuticle // inferred from electronic annotation
Group 2 vs 1	1623194_at	CG7637	FBgn0033548	558.023	1710.44	3.06519	0	177	DEG	Group 3 vs 1	1623194_at	558.023	837.399	1.50065	0.0030401	827	DEG	Group 3 vs 2	1623194_at	1710.44	837.399	-2.04257	0	241	DEG	1623194_at	CG7637	---	chr2R:6698060-6698395 (-) // 98.54 //	0006364 // rRNA processing // inferred from electronic annotation /// 0042254 // ribosome biogenesis // inferred from electronic annotation	0005634 // nucleus // inferred from electronic annotation /// 0030529 // ribonucleoprotein complex // inferred from electronic annotation	0005515 // protein binding // inferred from physical interaction
Group 2 vs 1	1626966_s_at	---	---	902.814	295.366	-3.0566	0	178	DEG	Group 3 vs 1	1626966_s_at	902.814	406.536	-2.22075	0	230	DEG	Group 3 vs 2	1626966_s_at	295.366	406.536	1.37638	0.033413	2278	DEG<1.5/-1.266	1626966_s_at	---	---	chr2LHet:123504-127732 (+) // 99.62 // /// chrX:21953675-21957911 (+) // 99.74 // /// chrX:15307141-15311367 (+) // 99.55 // /// chrU:6808961-6811605 (+) // 62.35 // /// chr2L:4066112-4068854 (-) // 64.64 // /// chr2R:3322456-3326688 (-) // 99.91 // /// chr2R:2298598-2302830 (-) // 99.74 // /// chr3L:24334502-24337243 (-) // 64.59 // /// chrX:22099392-22103618 (-) // 99.62 // /// chrX:7925539-792…	---	---	---
Group 2 vs 1	1633378_at	Lectin-galC1	FBgn0016675	1164.01	384.093	-3.03055	0	179	DEG	Group 3 vs 1	1633378_at	1164.01	521.069	-2.23389	0	228	DEG	Group 3 vs 2	1633378_at	384.093	521.069	1.35662	0.00547908	1312	DEG<1.5/-1.326	1633378_at	Lectin-galC1	galactin	chr2L:19417446-19418274 (+) // 99.48 //	0006952 // defense response // non-traceable author statement /// 0043152 // induction of bacterial agglutination // inferred from direct assay	---	0004872 // receptor activity // traceable author statement /// 0005488 // binding // inferred from electronic annotation /// 0005515 // protein binding // inferred from physical interaction /// 0005529 // sugar binding // non-traceable author statement /// 0005529 // sugar binding // inferred from electronic annotation /// 0005534 // galactose binding // inferred from direct assay /// 0005534 // …
Group 2 vs 1	1635517_at	CG1667	FBgn0033453	386.42	1164.34	3.01314	0	180	DEG	Group 3 vs 1	1635517_at	386.42	1544.14	3.99603	0	124	DEG	Group 3 vs 2	1635517_at	1164.34	1544.14	1.3262	0	603	DEG<1.5/-1.149	1635517_at	CG1667	---	chr2R:5731311-5733025 (+) // 100.0 //	---	---	---
Group 2 vs 1	1625026_at	CG3348	FBgn0040609	1735.06	5150.72	2.96861	0	181	DEG	Group 3 vs 1	1625026_at	1735.06	2764.75	1.59346	0	373	DEG	Group 3 vs 2	1625026_at	5150.72	2764.75	-1.863	0	287	DEG	1625026_at	CG3348	---	chr3R:23117256-23117911 (-) // 99.24 //	0006030 // chitin metabolic process // inferred from electronic annotation	0005576 // extracellular region // inferred from electronic annotation	0005515 // protein binding // inferred from physical interaction /// 0008061 // chitin binding // inferred from electronic annotation
Group 2 vs 1	1629747_at	Cpr49Ag	FBgn0033730	1474.71	4330.01	2.93618	0	182	DEG	Group 3 vs 1	1629747_at	1474.71	2071.63	1.40477	0	470	DEG_FC<1.5/-1.66	Group 3 vs 2	1629747_at	4330.01	2071.63	-2.09014	0	227	DEG	1629747_at	Cpr49Ag	CG8511	chr2R:8295340-8296038 (+) // 100.0 //	---	---	0005214 // structural constituent of chitin-based cuticle // inferred from sequence or structural similarity /// 0042302 // structural constituent of cuticle // inferred from electronic annotation
Group 2 vs 1	1630848_at	obst-I	FBgn0052304	499.489	1464.26	2.93152	0	183	DEG	Group 3 vs 1	1630848_at	499.489	293.458	-1.70208	0.00259826	819	DEG	Group 3 vs 2	1630848_at	1464.26	293.458	-4.98968	0	67	DEG	1630848_at	obst-I	CG32304	chr3L:2267869-2268529 (+) // 100.0 //	0006030 // chitin metabolic process // inferred from electronic annotation	0005576 // extracellular region // inferred from electronic annotation	0008061 // chitin binding // inferred from electronic annotation /// 0008061 // chitin binding // inferred from reviewed computational analysis
Group 2 vs 1	1639694_s_at	Arc1 /// CG10102	FBgn0033926 /// FBgn0033927	6408.05	2189.61	-2.92657	0	184	DEG	Group 3 vs 1	1639694_s_at	6408.05	2162.14	-2.96375	0	166	DEG	Group 3 vs 2	1639694_s_at	2189.61	2162.14	-1.01271	0.117638		nonDEG	1639694_s_at	Arc1 /// CG10102	Arc1 /// ---	chr2R:10248808-10249506 (-) // 100.0 //	---	---	0003676 // nucleic acid binding // inferred from electronic annotation /// 0008270 // zinc ion binding // inferred from electronic annotation
Group 2 vs 1	1629853_at	CG3699	FBgn0040349	959.37	2796.08	2.9145	0	185	DEG	Group 3 vs 1	1629853_at	959.37	2907.19	3.03031	0	165	DEG	Group 3 vs 2	1629853_at	2796.08	2907.19	1.03974	0.0690007		nonDEG	1629853_at	CG3699	---	chrX:840690-841517 (-) // 99.4 //	0008152 // metabolic process // inferred from electronic annotation /// 0055114 // oxidation reduction // inferred from electronic annotation	---	0003824 // catalytic activity // inferred from electronic annotation /// 0005488 // binding // inferred from electronic annotation /// 0016491 // oxidoreductase activity // inferred from electronic annotation /// 0016614 // oxidoreductase activity, acting on CH-OH group of donors // inferred from sequence or structural similarity
Group 2 vs 1	1629753_at	Kr	FBgn0001325	1069.56	367.24	-2.91242	0	186	DEG	Group 3 vs 1	1629753_at	1069.56	783.138	-1.36573	0.0078918	1671	DEG_FC<1.5/-1.1151	Group 3 vs 2	1629753_at	367.24	783.138	2.1325	0	217	DEG	1629753_at	Kr	Kruppel	chr2R:21114137-21117053 (+) // 99.84 //	0000122 // negative regulation of transcription from RNA polymerase II promoter // traceable author statement /// 0007275 // multicellular organismal development // inferred from electronic annotation /// 0007354 // zygotic determination of anterior/posterior axis, embryo // non-traceable author statement /// 0007354 // zygotic determination of anterior/posterior axis, embryo // traceable author …	0005622 // intracellular // inferred from electronic annotation /// 0005634 // nucleus // non-traceable author statement /// 0005634 // nucleus // inferred from electronic annotation	0003676 // nucleic acid binding // inferred from electronic annotation /// 0003677 // DNA binding // inferred from direct assay /// 0003677 // DNA binding // inferred from electronic annotation /// 0003682 // chromatin binding // non-traceable author statement /// 0003704 // specific RNA polymerase II transcription factor activity // non-traceable author statement /// 0005515 // protein binding /…
Group 2 vs 1	1641055_at	Hsp23	FBgn0001224	886.936	306.091	-2.89762	0	187	DEG	Group 3 vs 1	1641055_at	886.936	1049.01	1.18273	0.0181616		nonDEG	Group 3 vs 2	1641055_at	306.091	1049.01	3.42711	0	109	DEG	1641055_at	Hsp23	Protein 23	chr3L:9374983-9375867 (+) // 100.0 //	0006950 // response to stress // inferred from electronic annotation /// 0009408 // response to heat // inferred from sequence or structural similarity /// 0009408 // response to heat // non-traceable author statement	---	0003779 // actin binding // inferred from sequence or structural similarity /// 0005515 // protein binding // inferred from physical interaction
Group 2 vs 1	1636507_at	vanin-like	FBgn0040069	2671.9	7675.65	2.87273	0	188	DEG	Group 3 vs 1	1636507_at	2671.9	3489.89	1.30614	0	568	DEG_FC<1.5/-1.164	Group 3 vs 2	1636507_at	7675.65	3489.89	-2.1994	0	205	DEG	1636507_at	vanin-like	vanin-like	chrX:6094219-6096592 (-) // 100.0 //	0006807 // nitrogen compound metabolic process // inferred from electronic annotation	0019898 // extrinsic to membrane // non-traceable author statement	0016787 // hydrolase activity // inferred from electronic annotation /// 0016787 // hydrolase activity // non-traceable author statement /// 0016810 // hydrolase activity, acting on carbon-nitrogen (but not peptide) bonds // inferred from electronic annotation /// 0016811 // hydrolase activity, acting on carbon-nitrogen (but not peptide) bonds, in linear amides // inferred from electronic annotat…
Group 2 vs 1	1626830_at	CG6044 /// Lcp1	FBgn0002531	10266.4	3574.37	-2.87222	0	189	DEG	Group 3 vs 1	1626830_at	10266.4	10938.2	1.06544	0		nonDEG	Group 3 vs 2	1626830_at	3574.37	10938.2	3.06017	0	126	DEG	1626830_at	CG6044 /// Lcp1	--- /// cuticle p. I	chr2R:4318138-4318737 (-) // 100.0 //	---	---	0005198 // structural molecule activity // inferred from electronic annotation /// 0005214 // structural constituent of chitin-based cuticle // inferred from sequence or structural similarity /// 0005515 // protein binding // inferred from physical interaction /// 0008010 // structural constituent of chitin-based larval cuticle // non-traceable author statement /// 0042302 // structural constitue…
Group 2 vs 1	1624092_at	Jon99Ci	FBgn0003358	5289.5	1852.89	-2.85472	0	190	DEG	Group 3 vs 1	1624092_at	5289.5	4519.16	-1.17046	0.00152392		nonDEG	Group 3 vs 2	1624092_at	1852.89	4519.16	2.43898	0	172	DEG	1624092_at	Jon99Ci	Jonah 99C Alpha	chr3R:25750946-25751907 (-) // 100.0 //	0006508 // proteolysis // inferred from electronic annotation /// 0006508 // proteolysis // non-traceable author statement /// 0007586 // digestion // non-traceable author statement	---	0003824 // catalytic activity // inferred from electronic annotation /// 0004252 // serine-type endopeptidase activity // inferred from sequence or structural similarity /// 0004252 // serine-type endopeptidase activity // non-traceable author statement /// 0004252 // serine-type endopeptidase activity // inferred from electronic annotation /// 0008233 // peptidase activity // inferred from elect…
Group 2 vs 1	1635691_at	br	FBgn0000210	722.429	253.071	-2.85464	0	191	DEG	Group 3 vs 1	1635691_at	722.429	701.346	-1.03006	0.164323		nonDEG	Group 3 vs 2	1635691_at	253.071	701.346	2.77134	0	146	DEG	1635691_at	br	broad	chrX:1518170-1555575 (+) // 100.0 //	0001752 // compound eye photoreceptor fate commitment // inferred from mutant phenotype /// 0006355 // regulation of transcription, DNA-dependent // non-traceable author statement /// 0006914 // autophagy // inferred from mutant phenotype /// 0007275 // multicellular organismal development // inferred from electronic annotation /// 0007458 // progression of morphogenetic furrow during compound ey…	0005622 // intracellular // inferred from electronic annotation /// 0005634 // nucleus // non-traceable author statement /// 0005634 // nucleus // inferred from electronic annotation	0003677 // DNA binding // inferred from direct assay /// 0003677 // DNA binding // inferred from electronic annotation /// 0003700 // transcription factor activity // traceable author statement /// 0003704 // specific RNA polymerase II transcription factor activity // non-traceable author statement /// 0005515 // protein binding // inferred from electronic annotation /// 0005515 // protein bindin…
Group 2 vs 1	1640574_at	hoip /// raps	FBgn0015393	1009.17	2867.51	2.84146	0	192	DEG	Group 3 vs 1	1640574_at	1009.17	1346.31	1.33408	0.00251639	1487	DEG_FC<1.5/-1.777	Group 3 vs 2	1640574_at	2867.51	1346.31	-2.1299	0	219	DEG	1640574_at	hoip /// raps	hoi-polloi /// Partner of Inscuteable	chr2L:9699833-9700465 (+) // 100.0 //	0000132 // establishment of mitotic spindle orientation // inferred from mutant phenotype /// 0000398 // nuclear mRNA splicing, via spliceosome // inferred from sequence or structural similarity /// 0006397 // mRNA processing // inferred from electronic annotation /// 0007165 // signal transduction // inferred from electronic annotation /// 0007399 // nervous system development // inferred from m…	0005634 // nucleus // non-traceable author statement /// 0005634 // nucleus // inferred from electronic annotation /// 0005681 // spliceosome // inferred from sequence or structural similarity /// 0005681 // spliceosome // inferred from electronic annotation /// 0005938 // cell cortex // traceable author statement /// 0030529 // ribonucleoprotein complex // inferred from electronic annotation ///…	0003723 // RNA binding // inferred from electronic annotation /// 0003729 // mRNA binding // inferred from sequence or structural similarity /// 0005096 // GTPase activator activity // inferred from electronic annotation /// 0005488 // binding // inferred from electronic annotation /// 0005515 // protein binding // inferred from physical interaction
Group 2 vs 1	1626444_at	Fib	FBgn0003062	629.355	1765.09	2.8046	0	193	DEG	Group 3 vs 1	1626444_at	629.355	795.929	1.26467	0.026175	1993	DEG_FC<1.5/-1.2229	Group 3 vs 2	1626444_at	1765.09	795.929	-2.21765	0	200	DEG	1626444_at	Fib	Fibrillarin	chr2R:18960413-18962243 (-) // 100.0 //	0006364 // rRNA processing // inferred from sequence or structural similarity /// 0006364 // rRNA processing // inferred from electronic annotation /// 0006396 // RNA processing // inferred from sequence or structural similarity	0001651 // dense fibrillar component // inferred from sequence or structural similarity /// 0005634 // nucleus // inferred from electronic annotation /// 0005730 // nucleolus // inferred from direct assay /// 0005732 // small nucleolar ribonucleoprotein complex // inferred from sequence or structural similarity /// 0015030 // Cajal body // inferred from direct assay /// 0030529 // ribonucleoprote…	0003723 // RNA binding // inferred from electronic annotation /// 0003723 // RNA binding // inferred from sequence or structural similarity /// 0003729 // mRNA binding // inferred from sequence or structural similarity /// 0005515 // protein binding // inferred from physical interaction /// 0008168 // methyltransferase activity // inferred from electronic annotation /// 0016740 // transferase act…
Group 2 vs 1	1630725_at	CG14572	FBgn0037128	537.506	1506.45	2.80266	0	194	DEG	Group 3 vs 1	1630725_at	537.506	613.899	1.14212	0.124197		nonDEG	Group 3 vs 2	1630725_at	1506.45	613.899	-2.4539	0	168	DEG	1630725_at	CG14572	---	chr3L:21734638-21735542 (+) // 100.0 //	---	---	---
Group 2 vs 1	1628723_at	CG4038	FBgn0011824	492.92	1371.54	2.78249	0	195	DEG	Group 3 vs 1	1628723_at	492.92	715.191	1.45093	0.00531765	1596	DEG_FC<1.5/-1.1102	Group 3 vs 2	1628723_at	1371.54	715.191	-1.91773	0	272	DEG	1628723_at	CG4038	---	chr2R:16983446-16984808 (-) // 100.0 //	0006364 // rRNA processing // inferred from sequence or structural similarity /// 0006364 // rRNA processing // inferred from electronic annotation /// 0031118 // rRNA pseudouridine synthesis // inferred from sequence or structural similarity /// 0042254 // ribosome biogenesis // inferred from electronic annotation	0005634 // nucleus // inferred from electronic annotation /// 0005732 // small nucleolar ribonucleoprotein complex // inferred from sequence or structural similarity /// 0005732 // small nucleolar ribonucleoprotein complex // inferred from electronic annotation /// 0030529 // ribonucleoprotein complex // inferred from electronic annotation /// 0030532 // small nuclear ribonucleoprotein complex //…	0003723 // RNA binding // inferred from electronic annotation /// 0005515 // protein binding // inferred from physical interaction /// 0019843 // rRNA binding // inferred from electronic annotation /// 0030515 // snoRNA binding // inferred from sequence or structural similarity /// 0030559 // rRNA pseudouridylation guide activity // inferred from sequence or structural similarity
Group 2 vs 1	1624569_at	CG31087	FBgn0051087	1095.04	393.855	-2.78031	0	196	DEG	Group 3 vs 1	1624569_at	1095.04	357.283	-3.06491	0	163	DEG	Group 3 vs 2	1624569_at	393.855	357.283	-1.10236	0.1874		nonDEG	1624569_at	CG31087	---	chr3R:21136859-21138375 (-) // 100.0 //	---	---	---
Group 2 vs 1	1628162_at	CG9757	FBgn0003060	5305.48	1914.34	-2.77144	0	197	DEG	Group 3 vs 1	1628162_at	5305.48	4089.79	-1.29725	0	577	DEG_FC<1.5/-1.173	Group 3 vs 2	1628162_at	1914.34	4089.79	2.1364	0	216	DEG	1628162_at	CG9757	---	chr3R:9437585-9438151 (-) // 100.0 //	---	---	0005515 // protein binding // inferred from physical interaction
Group 2 vs 1	1637902_at	CG10918	FBgn0031178	446.122	1235.91	2.77034	0	198	DEG	Group 3 vs 1	1637902_at	446.122	1279.76	2.86863	0	173	DEG	Group 3 vs 2	1637902_at	1235.91	1279.76	1.03548	0.0534818		nonDEG	1637902_at	CG10918	---	chrX:21299718-21300270 (-) // 100.0 //	---	---	0005515 // protein binding // inferred from physical interaction
Group 2 vs 1	1632908_s_at	Lerp	FBgn0051072	939.94	340.848	-2.75766	0	199	DEG	Group 3 vs 1	1632908_s_at	939.94	956.394	1.01751	0.18875		nonDEG	Group 3 vs 2	1632908_s_at	340.848	956.394	2.80593	0	143	DEG	1632908_s_at	Lerp	lysosomal enzyme receptor protein	chr3R:22668183-22688843 (-) // 100.0 //	0006810 // transport // inferred from electronic annotation /// 0006892 // post-Golgi vesicle-mediated transport // inferred from direct assay /// 0007041 // lysosomal transport // inferred from direct assay	0005737 // cytoplasm // inferred by curator /// 0005737 // cytoplasm // inferred from electronic annotation /// 0016021 // integral to membrane // inferred from electronic annotation	0004872 // receptor activity // inferred from sequence or structural similarity /// 0004872 // receptor activity // inferred from electronic annotation /// 0005215 // transporter activity // inferred from electronic annotation /// 0005515 // protein binding // inferred from physical interaction /// 0005515 // protein binding // inferred from electronic annotation
Group 2 vs 1	1632705_at	ninaD	FBgn0002939	3828.28	1393.18	-2.74787	0	200	DEG	Group 3 vs 1	1632705_at	3828.28	1744.95	-2.19391	0	234	DEG	Group 3 vs 2	1632705_at	1393.18	1744.95	1.2525	0.00379891	1183	DEG<1.5/-1.721	1632705_at	ninaD	neither inactivation nor afterpotential D	chr2L:18081629-18083608 (+) // 100.0 //	0006952 // defense response // non-traceable author statement /// 0007155 // cell adhesion // inferred from electronic annotation /// 0007602 // phototransduction // inferred from mutant phenotype /// 0007603 // phototransduction, visible light // inferred from mutant phenotype /// 0007604 // phototransduction, UV // inferred from mutant phenotype /// 0016063 // rhodopsin biosynthetic process // …	0005887 // integral to plasma membrane // non-traceable author statement /// 0016020 // membrane // inferred from electronic annotation	0005044 // scavenger receptor activity // inferred from mutant phenotype /// 0005044 // scavenger receptor activity // inferred from sequence or structural similarity /// 0005044 // scavenger receptor activity // non-traceable author statement
Group 2 vs 1	1634097_s_at	CG11407 /// CG11659 /// CG6300	FBgn0038730 /// FBgn0038731	2720.71	991.975	-2.74272	0	201	DEG	Group 3 vs 1	1634097_s_at	2720.71	721.426	-3.7713	0	132	DEG	Group 3 vs 2	1634097_s_at	991.975	721.426	-1.37502	0.00601974	1330	DEG<1.5/-1.270	1634097_s_at	CG11407 /// CG11659 /// CG6300	--- /// --- /// ---	chrUextra:11635009-11635755 (-) // 43.58 // /// chr3R:15601194-15603002 (-) // 100.0 // /// chr3R:15597115-15598947 (-) // 98.23 //	0008152 // metabolic process // inferred from electronic annotation	---	0003779 // actin binding // inferred from electronic annotation /// 0003824 // catalytic activity // inferred from electronic annotation /// 0005324 // long-chain fatty acid transporter activity // inferred from sequence or structural similarity /// 0005515 // protein binding // inferred from physical interaction
Group 2 vs 1	1634912_at	mod	FBgn0002780	1588.07	4347.89	2.73785	0	202	DEG	Group 3 vs 1	1634912_at	1588.07	2125.75	1.33858	0	540	DEG_FC<1.5/-1.136	Group 3 vs 2	1634912_at	4347.89	2125.75	-2.04534	0	238	DEG	1634912_at	mod	modulo	chr3R:27877793-27880696 (+) // 100.0 //	0007286 // spermatid development // inferred from mutant phenotype /// 0008283 // cell proliferation // inferred from mutant phenotype	0005634 // nucleus // inferred from direct assay /// 0005634 // nucleus // non-traceable author statement /// 0005634 // nucleus // inferred from electronic annotation /// 0005737 // cytoplasm // inferred from direct assay	0000166 // nucleotide binding // inferred from electronic annotation /// 0003676 // nucleic acid binding // inferred from electronic annotation /// 0003677 // DNA binding // inferred from direct assay /// 0003677 // DNA binding // non-traceable author statement /// 0003677 // DNA binding // inferred from electronic annotation /// 0003723 // RNA binding // inferred from electronic annotation /// 0…
Group 2 vs 1	1628099_at	bor	FBgn0040237	1084.5	2958.66	2.72814	0	203	DEG	Group 3 vs 1	1628099_at	1084.5	1255.95	1.1581	0.0504868		nonDEG	Group 3 vs 2	1628099_at	2958.66	1255.95	-2.35571	0	183	DEG	1628099_at	bor	belphegor	chr3R:12087076-12089810 (-) // 99.79 //	---	0005737 // cytoplasm // non-traceable author statement	0000166 // nucleotide binding // inferred from electronic annotation /// 0005524 // ATP binding // inferred from electronic annotation /// 0016787 // hydrolase activity // inferred from electronic annotation /// 0017111 // nucleoside-triphosphatase activity // inferred from electronic annotation
Group 2 vs 1	1627538_at	CG6770	FBgn0032400	4195.65	1542.04	-2.72084	0	204	DEG	Group 3 vs 1	1627538_at	4195.65	3971.21	-1.05652	0.0159768		nonDEG	Group 3 vs 2	1627538_at	1542.04	3971.21	2.5753	0	159	DEG	1627538_at	CG6770	---	chr2L:12045349-12046100 (-) // 99.47 //	0006979 // response to oxidative stress // inferred from mutant phenotype	---	---
Group 2 vs 1	1632659_at	---	FBgn0031140	1763.76	654.791	-2.69362	0	205	DEG	Group 3 vs 1	1632659_at	1763.76	674.491	-2.61495	0	194	DEG	Group 3 vs 2	1632659_at	654.791	674.491	1.03009			nonDEG	1632659_at	---	---	chrX:20806072-20810408 (+) // 100.0 //	---	0005886 // plasma membrane // inferred from sequence or structural similarity /// 0016020 // membrane // inferred from electronic annotation /// 0016021 // integral to membrane // inferred from electronic annotation	0005515 // protein binding // inferred from physical interaction /// 0008158 // hedgehog receptor activity // inferred from electronic annotation
Group 2 vs 1	1635467_a_at	CG7381	FBgn0038098	4978.61	1862.67	-2.67283	0	206	DEG	Group 3 vs 1	1635467_a_at	4978.61	1748.48	-2.8474	0	174	DEG	Group 3 vs 2	1635467_a_at	1862.67	1748.48	-1.06531	0.100287		nonDEG	1635467_a_at	CG7381	---	chr3R:8793489-8803193 (-) // 100.0 //	---	---	0005515 // protein binding // inferred from physical interaction
Group 2 vs 1	1634162_at	CG40198	FBgn0058198	2206.37	5881.28	2.66559	0	207	DEG	Group 3 vs 1	1634162_at	2206.37	2651.12	1.20157	0.00111113	1384	DEG_FC<1.5/-1.525	Group 3 vs 2	1634162_at	5881.28	2651.12	-2.21842	0	199	DEG	1634162_at	CG40198	---	chr3RHet:2505271-2505998 (-) // 100.0 //	---	---	---
Group 2 vs 1	1630950_at	nop5	FBgn0026196	790.713	2105.27	2.6625	0	208	DEG	Group 3 vs 1	1630950_at	790.713	893.504	1.13	0.0812998		nonDEG	Group 3 vs 2	1630950_at	2105.27	893.504	-2.3562	0	182	DEG	1630950_at	nop5	nop5	chr2L:6916748-6918741 (-) // 100.0 //	0006364 // rRNA processing // non-traceable author statement	0005875 // microtubule associated complex // inferred from sequence or structural similarity	0005515 // protein binding // inferred from physical interaction
Group 2 vs 1	1627111_at	NHP2	FBgn0029148	788.923	2100.08	2.66196	0	209	DEG	Group 3 vs 1	1627111_at	788.923	974.442	1.23515	0.0175502	1870	DEG_FC<1.5/-1.1875	Group 3 vs 2	1627111_at	2100.08	974.442	-2.15516	0	211	DEG	1627111_at	NHP2	NHP2	chr3L:14794489-14795289 (-) // 100.0 //	0006364 // rRNA processing // inferred from sequence or structural similarity /// 0006364 // rRNA processing // inferred from electronic annotation /// 0031118 // rRNA pseudouridine synthesis // inferred from sequence or structural similarity /// 0042254 // ribosome biogenesis // inferred from electronic annotation	0005634 // nucleus // inferred from electronic annotation /// 0005730 // nucleolus // non-traceable author statement /// 0005732 // small nucleolar ribonucleoprotein complex // inferred from sequence or structural similarity /// 0030529 // ribonucleoprotein complex // inferred from electronic annotation	0003723 // RNA binding // inferred from electronic annotation /// 0005515 // protein binding // inferred from physical interaction /// 0030515 // snoRNA binding // inferred from sequence or structural similarity /// 0030559 // rRNA pseudouridylation guide activity // inferred from sequence or structural similarity
Group 2 vs 1	1629903_at	CG30359	FBgn0050359	734.057	277.005	-2.64998	0	210	DEG	Group 3 vs 1	1629903_at	734.057	1063.64	1.44899	0.00421266	1547	DEG_FC<1.5/-1.988	Group 3 vs 2	1629903_at	277.005	1063.64	3.83981	0	98	DEG	1629903_at	CG30359	---	chr2R:4350277-4352599 (+) // 100.0 //	0005975 // carbohydrate metabolic process // inferred from electronic annotation	---	0003824 // catalytic activity // inferred from electronic annotation /// 0043169 // cation binding // inferred from electronic annotation
Group 2 vs 1	1623165_at	thetaTry	FBgn0011555	2236.03	846.673	-2.64096	0	211	DEG	Group 3 vs 1	1623165_at	2236.03	2115.82	-1.05682	0.0459978		nonDEG	Group 3 vs 2	1623165_at	846.673	2115.82	2.49898	0	164	DEG	1623165_at	thetaTry	thetaTrypsin	chr2R:7228995-7230261 (-) // 100.0 //	0006508 // proteolysis // inferred from electronic annotation /// 0006508 // proteolysis // non-traceable author statement	0005576 // extracellular region // non-traceable author statement /// 0005576 // extracellular region // inferred from electronic annotation	0003824 // catalytic activity // inferred from electronic annotation /// 0004252 // serine-type endopeptidase activity // inferred from electronic annotation /// 0008233 // peptidase activity // inferred from electronic annotation /// 0016787 // hydrolase activity // inferred from electronic annotation
Group 2 vs 1	1638301_at	CG8157	FBgn0034010	1284.36	3380.1	2.63173	0	212	DEG	Group 3 vs 1	1638301_at	1284.36	1802.42	1.40336	0.00190732	1460	DEG_FC<1.5/-1.645	Group 3 vs 2	1638301_at	3380.1	1802.42	-1.87531	0	286	DEG	1638301_at	CG8157	---	chr2R:11213337-11213888 (-) // 100.0 //	---	---	---
Group 2 vs 1	1634762_a_at	CG15096	FBgn0034394	1275.59	487.576	-2.61618	0	213	DEG	Group 3 vs 1	1634762_a_at	1275.59	546.182	-2.33546	0	217	DEG	Group 3 vs 2	1634762_a_at	487.576	546.182	1.1202	0.0860737		nonDEG	1634762_a_at	CG15096	---	chr2R:14695840-14702514 (-) // 100.0 //	0006810 // transport // inferred from electronic annotation	0016021 // integral to membrane // inferred from electronic annotation	0005215 // transporter activity // inferred from electronic annotation /// 0005316 // high affinity inorganic phosphate:sodium symporter activity // inferred from sequence or structural similarity
Group 2 vs 1	1637309_a_at	Cyp12e1	FBgn0037817	1310.88	502.449	-2.60899	0	214	DEG	Group 3 vs 1	1637309_a_at	1310.88	802.709	-1.63307	0	359	DEG	Group 3 vs 2	1637309_a_at	502.449	802.709	1.59759	0	399	DEG	1637309_a_at	Cyp12e1	Cyp12e1	chr3R:6260521-6262385 (+) // 100.0 //	0006412 // translation // inferred from electronic annotation /// 0055114 // oxidation reduction // inferred from electronic annotation	0005739 // mitochondrion // inferred from sequence or structural similarity /// 0005739 // mitochondrion // non-traceable author statement /// 0005739 // mitochondrion // inferred from electronic annotation /// 0005840 // ribosome // inferred from electronic annotation /// 0016020 // membrane // inferred from electronic annotation /// 0031966 // mitochondrial membrane // inferred from electronic …	0003735 // structural constituent of ribosome // inferred from electronic annotation /// 0004497 // monooxygenase activity // inferred from electronic annotation /// 0005506 // iron ion binding // inferred from electronic annotation /// 0009055 // electron carrier activity // inferred from electronic annotation /// 0009055 // electron carrier activity // inferred from sequence or structural simil…
Group 2 vs 1	1635548_s_at	CG30287 /// CG34166	FBgn0085195	6217.89	2387.41	-2.60445	0	215	DEG	Group 3 vs 1	1635548_s_at	6217.89	11123.6	1.78897	0	303	DEG	Group 3 vs 2	1635548_s_at	2387.41	11123.6	4.65929	0	77	DEG	1635548_s_at	CG30287 /// CG34166	--- /// ---	chr2L:14743252-14743860 (+) // 100.0 //	0006508 // proteolysis // inferred from electronic annotation	---	0003824 // catalytic activity // inferred from electronic annotation /// 0004252 // serine-type endopeptidase activity // inferred from electronic annotation /// 0008233 // peptidase activity // inferred from electronic annotation /// 0016787 // hydrolase activity // inferred from electronic annotation
Group 2 vs 1	1628558_at	CG30022	FBgn0050022	621.573	1617.12	2.60166	0	216	DEG	Group 3 vs 1	1628558_at	621.573	1616.68	2.60095	0	196	DEG	Group 3 vs 2	1628558_at	1617.12	1616.68	-1.00027			nonDEG	1628558_at	CG30022	---	chr2R:7274820-7276282 (-) // 100.0 //	---	---	0016787 // hydrolase activity // inferred from electronic annotation /// 0016829 // lyase activity // inferred from electronic annotation
Group 2 vs 1	1625066_at	CG13230	FBgn0040764	4206.18	1627.64	-2.58422	0	217	DEG	Group 3 vs 1	1625066_at	4206.18	3975.98	-1.0579	0.0253721		nonDEG	Group 3 vs 2	1625066_at	1627.64	3975.98	2.44279	0	171	DEG	1625066_at	CG13230	---	chr2R:7042432-7042731 (+) // 100.0 //	---	---	---
Group 2 vs 1	1639297_at	CG9568	FBgn0032087	6005.39	2325.72	-2.58217	0	218	DEG	Group 3 vs 1	1639297_at	6005.39	2234.1	-2.68806	0	186	DEG	Group 3 vs 2	1639297_at	2325.72	2234.1	-1.04101	0.074311		nonDEG	1639297_at	CG9568	---	chr2L:9010598-9011344 (+) // 100.0 //	---	---	---
Group 2 vs 1	1626022_at	Cyp12e1	FBgn0037817	878.817	340.901	-2.57792	0	219	DEG	Group 3 vs 1	1626022_at	878.817	546.453	-1.60822	0	368	DEG	Group 3 vs 2	1626022_at	340.901	546.453	1.60297	0.00105625	835	DEG	1626022_at	Cyp12e1	Cyp12e1	chr3R:6260521-6262385 (+) // 100.0 //	0006412 // translation // inferred from electronic annotation /// 0055114 // oxidation reduction // inferred from electronic annotation	0005739 // mitochondrion // inferred from sequence or structural similarity /// 0005739 // mitochondrion // non-traceable author statement /// 0005739 // mitochondrion // inferred from electronic annotation /// 0005840 // ribosome // inferred from electronic annotation /// 0016020 // membrane // inferred from electronic annotation /// 0031966 // mitochondrial membrane // inferred from electronic …	0003735 // structural constituent of ribosome // inferred from electronic annotation /// 0004497 // monooxygenase activity // inferred from electronic annotation /// 0005506 // iron ion binding // inferred from electronic annotation /// 0009055 // electron carrier activity // inferred from electronic annotation /// 0009055 // electron carrier activity // inferred from sequence or structural simil…
Group 2 vs 1	1633772_at	CG32564	FBgn0052564	1728.88	4453.61	2.57601	0	220	DEG	Group 3 vs 1	1633772_at	1728.88	2551.04	1.47555	0	423	DEG_FC<1.5/-1.19	Group 3 vs 2	1633772_at	4453.61	2551.04	-1.7458	0	328	DEG	1633772_at	CG32564	---	chrX:17100452-17101887 (+) // 100.0 //	---	---	---
Group 2 vs 1	1634568_at	Cpr67Fa2	FBgn0036109	2302.94	5928.55	2.57434	0	221	DEG	Group 3 vs 1	1634568_at	2302.94	3507.39	1.523	0	401	DEG	Group 3 vs 2	1634568_at	5928.55	3507.39	-1.6903	0	346	DEG	1634568_at	Cpr67Fa2	CG18349	chr3L:10884842-10885616 (+) // 100.0 //	---	---	0005214 // structural constituent of chitin-based cuticle // inferred from sequence or structural similarity /// 0005515 // protein binding // inferred from physical interaction /// 0042302 // structural constituent of cuticle // inferred from electronic annotation
Group 2 vs 1	1639554_at	Nop60B	FBgn0023184	753.775	1936.39	2.56892	0	222	DEG	Group 3 vs 1	1639554_at	753.775	975.324	1.29392	0.0116933	1757	DEG_FC<1.5/-1.1556	Group 3 vs 2	1639554_at	1936.39	975.324	-1.98538	0	247	DEG	1639554_at	Nop60B	minifly	chr2R:20062247-20064653 (+) // 100.0 //	0001522 // pseudouridine synthesis // inferred from mutant phenotype /// 0001522 // pseudouridine synthesis // inferred from electronic annotation /// 0006364 // rRNA processing // inferred from mutant phenotype /// 0006364 // rRNA processing // non-traceable author statement /// 0006364 // rRNA processing // inferred from electronic annotation /// 0007281 // germ cell development // inferred fro…	0005634 // nucleus // non-traceable author statement /// 0005634 // nucleus // inferred from electronic annotation /// 0005730 // nucleolus // inferred from direct assay /// 0005730 // nucleolus // inferred from sequence or structural similarity /// 0005730 // nucleolus // non-traceable author statement /// 0030529 // ribonucleoprotein complex // inferred from electronic annotation	0003723 // RNA binding // inferred from electronic annotation /// 0004730 // pseudouridylate synthase activity // inferred from sequence or structural similarity /// 0004730 // pseudouridylate synthase activity // inferred from electronic annotation /// 0005515 // protein binding // inferred from physical interaction /// 0009982 // pseudouridine synthase activity // inferred from electronic annot…
Group 2 vs 1	1624322_at	Rh50	FBgn0028699	903.915	2310.92	2.55657	0	223	DEG	Group 3 vs 1	1624322_at	903.915	1522.43	1.68427	0	347	DEG	Group 3 vs 2	1624322_at	2310.92	1522.43	-1.51792	0	438	DEG	1624322_at	Rh50	Rh50	chr3L:4910385-4919044 (+) // 100.0 //	---	0016020 // membrane // inferred from electronic annotation /// 0016021 // integral to membrane // inferred from electronic annotation	---
Group 2 vs 1	1637060_a_at	Nopp140	FBgn0037137	734.153	1876.63	2.55618	0	224	DEG	Group 3 vs 1	1637060_a_at	734.153	923.621	1.25808	0.0152852	1833	DEG_FC<1.5/-1.1762	Group 3 vs 2	1637060_a_at	1876.63	923.621	-2.03182	0	243	DEG	1637060_a_at	Nopp140	Nopp140	chr3L:21825844-21829787 (+) // 100.0 //	0017126 // nucleologenesis // inferred from sequence or structural similarity	0005730 // nucleolus // inferred from sequence or structural similarity /// 0005730 // nucleolus // traceable author statement	---
Group 2 vs 1	1635756_at	CG32039	FBgn0052039	686.121	268.625	-2.5542	0	225	DEG	Group 3 vs 1	1635756_at	686.121	388.497	-1.76609	0.00162304	761	DEG	Group 3 vs 2	1635756_at	268.625	388.497	1.44624	0.00654079	1364	DEG<1.5/-1.93	1635756_at	CG32039	---	chr3L:9352122-9353104 (+) // 100.0 //	---	---	---
Group 2 vs 1	1629745_at	CG6439	FBgn0038922	634.989	1619.84	2.55097	0	226	DEG	Group 3 vs 1	1629745_at	634.989	1316.2	2.07279	0	253	DEG	Group 3 vs 2	1629745_at	1619.84	1316.2	-1.23069	0.00541051	1295	DEG<1.5/-1.836	1629745_at	CG6439	Isocitrate dehydrogenase	chr3R:17842263-17845104 (-) // 100.0 //	0006099 // tricarboxylic acid cycle // inferred from sequence or structural similarity /// 0006099 // tricarboxylic acid cycle // inferred from electronic annotation /// 0008152 // metabolic process // inferred from electronic annotation /// 0055114 // oxidation reduction // inferred from electronic annotation	0005739 // mitochondrion // inferred from sequence or structural similarity /// 0005739 // mitochondrion // inferred from electronic annotation	0004449 // isocitrate dehydrogenase (NAD+) activity // inferred from sequence or structural similarity /// 0004449 // isocitrate dehydrogenase (NAD+) activity // inferred from electronic annotation /// 0005515 // protein binding // inferred from physical interaction /// 0016491 // oxidoreductase activity // inferred from electronic annotation /// 0016616 // oxidoreductase activity, acting on the …
Group 2 vs 1	1632652_s_at	CG30022 /// CR40100	FBgn0050022 /// FBgn0058100	636.732	1624.2	2.55084	0	227	DEG	Group 3 vs 1	1632652_s_at	636.732	1747.55	2.74456	0	182	DEG	Group 3 vs 2	1632652_s_at	1624.2	1747.55	1.07594	0.0232776		nonDEG	1632652_s_at	CG30022 /// CR40100	--- /// ---	chr2RHet:1142179-1142507 (+) // 100.0 // /// chr2R:7274876-7275564 (-) // 90.51 //	---	---	0016787 // hydrolase activity // inferred from electronic annotation /// 0016829 // lyase activity // inferred from electronic annotation
Group 2 vs 1	1632017_at	Muc26B	FBgn0040950	1707	4332.06	2.53782	0	228	DEG	Group 3 vs 1	1632017_at	1707	2257.26	1.32236	0	555	DEG_FC<1.5/-1.151	Group 3 vs 2	1632017_at	4332.06	2257.26	-1.91916	0	269	DEG	1632017_at	Muc26B	Mucin 26B	chr2L:6151970-6153701 (+) // 100.0 //	0006030 // chitin metabolic process // inferred from electronic annotation	0005576 // extracellular region // inferred from electronic annotation	0008061 // chitin binding // inferred from electronic annotation
Group 2 vs 1	1624345_a_at	Nop56	FBgn0038964	1119.85	2841.09	2.53704	0	229	DEG	Group 3 vs 1	1624345_a_at	1119.85	1315.9	1.17507	0.0252168		nonDEG	Group 3 vs 2	1624345_a_at	2841.09	1315.9	-2.15905	0	210	DEG	1624345_a_at	Nop56	Nop56	chr3R:18244816-18246790 (-) // 100.0 //	---	0005730 // nucleolus // inferred from sequence or structural similarity /// 0005730 // nucleolus // non-traceable author statement /// 0030532 // small nuclear ribonucleoprotein complex // inferred from sequence or structural similarity	---
Group 2 vs 1	1630740_at	CG4363	FBgn0034663	1197.21	474.63	-2.52241	0	230	DEG	Group 3 vs 1	1630740_at	1197.21	1522.55	1.27175	0.0061806	1624	DEG_FC<1.5/-1.1201	Group 3 vs 2	1630740_at	474.63	1522.55	3.20787	0	116	DEG	1630740_at	CG4363	---	chr2R:17721803-17722534 (-) // 100.0 //	---	---	---
Group 2 vs 1	1637647_at	CG31148	FBgn0051148	5458.97	2170.81	-2.51472	0	231	DEG	Group 3 vs 1	1637647_at	5458.97	3974.62	-1.37346	0	495	DEG_FC<1.5/-1.91	Group 3 vs 2	1637647_at	2170.81	3974.62	1.83094	0	297	DEG	1637647_at	CG31148	---	chr3R:19526359-19528324 (+) // 100.0 //	0005975 // carbohydrate metabolic process // inferred from electronic annotation /// 0006665 // sphingolipid metabolic process // inferred from electronic annotation /// 0007040 // lysosome organization and biogenesis // inferred from electronic annotation /// 0008152 // metabolic process // inferred from electronic annotation	0005764 // lysosome // inferred from electronic annotation	0003824 // catalytic activity // inferred from electronic annotation /// 0004348 // glucosylceramidase activity // inferred from sequence or structural similarity /// 0004348 // glucosylceramidase activity // inferred from electronic annotation /// 0016787 // hydrolase activity // inferred from electronic annotation /// 0016798 // hydrolase activity, acting on glycosyl bonds // inferred from elec…
Group 2 vs 1	1627041_s_at	ine	FBgn0011603	497.355	1246.9	2.50706	0	232	DEG	Group 3 vs 1	1627041_s_at	497.355	777.514	1.5633	0.00241817	793	DEG	Group 3 vs 2	1627041_s_at	1246.9	777.514	-1.6037	0.00121182	889	DEG	1627041_s_at	ine	inebriated	chr2L:4467985-4477024 (-) // 100.0 //	0006810 // transport // inferred from electronic annotation /// 0006836 // neurotransmitter transport // inferred from electronic annotation /// 0006836 // neurotransmitter transport // inferred from sequence or structural similarity /// 0007275 // multicellular organismal development // inferred from electronic annotation /// 0007399 // nervous system development // inferred from electronic anno…	0005886 // plasma membrane // inferred from direct assay /// 0005886 // plasma membrane // inferred from sequence or structural similarity /// 0005887 // integral to plasma membrane // inferred from electronic annotation /// 0016020 // membrane // inferred from electronic annotation /// 0016021 // integral to membrane // inferred from electronic annotation /// 0016021 // integral to membrane // n…	0005034 // osmosensor activity // inferred from mutant phenotype /// 0005326 // neurotransmitter transporter activity // inferred from sequence or structural similarity /// 0005328 // neurotransmitter:sodium symporter activity // inferred from sequence or structural similarity /// 0005328 // neurotransmitter:sodium symporter activity // non-traceable author statement /// 0005328 // neurotransmitt…
Group 2 vs 1	1628261_at	CG13067	FBgn0036589	4049.71	10112.7	2.49714	0	233	DEG	Group 3 vs 1	1628261_at	4049.71	4889.63	1.2074	0	684	DEG_FC<1.5/-1.280	Group 3 vs 2	1628261_at	10112.7	4889.63	-2.06819	0	231	DEG	1628261_at	CG13067	---	chr3L:16264408-16265019 (+) // 100.0 //	---	---	0005515 // protein binding // inferred from physical interaction
Group 2 vs 1	1632540_at	iotaTry	FBgn0015001	730.132	293.456	-2.48805	0	234	DEG	Group 3 vs 1	1632540_at	730.132	375.794	-1.94291	0	275	DEG	Group 3 vs 2	1632540_at	293.456	375.794	1.28058	0.0285948	2173	DEG<1.5/-1.585	1632540_at	iotaTry	trypsin iota	chr2R:7244226-7245052 (+) // 100.0 //	0006508 // proteolysis // inferred from electronic annotation /// 0006508 // proteolysis // non-traceable author statement	0005576 // extracellular region // non-traceable author statement /// 0005576 // extracellular region // inferred from electronic annotation	0003824 // catalytic activity // inferred from electronic annotation /// 0004252 // serine-type endopeptidase activity // inferred from electronic annotation /// 0008233 // peptidase activity // inferred from electronic annotation /// 0016787 // hydrolase activity // inferred from electronic annotation
Group 2 vs 1	1633944_at	CG17362	FBgn0036393	1578.69	634.992	-2.48616	0	235	DEG	Group 3 vs 1	1633944_at	1578.69	2570.58	1.62829	0	361	DEG	Group 3 vs 2	1633944_at	634.992	2570.58	4.04821	0	89	DEG	1633944_at	CG17362	---	chr3L:13979045-13980216 (+) // 100.0 //	---	---	0005515 // protein binding // inferred from physical interaction
Group 2 vs 1	1625042_at	CG31288	FBgn0051288	1532.5	3806.36	2.48376	0	236	DEG	Group 3 vs 1	1625042_at	1532.5	1989.25	1.29804	0.0023956	1467	DEG_FC<1.5/-1.784	Group 3 vs 2	1625042_at	3806.36	1989.25	-1.91347	0	275	DEG	1625042_at	CG31288	---	chr3R:21123714-21125222 (-) // 100.0 //	---	---	---
Group 2 vs 1	1638324_s_at	bond	FBgn0038985	729.585	1794.34	2.4594	0	237	DEG	Group 3 vs 1	1638324_s_at	729.585	983.047	1.34741	0.0113487	1752	DEG_FC<1.5/-1.1539	Group 3 vs 2	1638324_s_at	1794.34	983.047	-1.82528	0	300	DEG	1638324_s_at	bond	james bond	chr3R:18376404-18382216 (+) // 99.63 //	---	0016021 // integral to membrane // inferred from electronic annotation	0008415 // acyltransferase activity // inferred from electronic annotation /// 0016740 // transferase activity // inferred from electronic annotation
Group 2 vs 1	1640500_at	CG13678	FBgn0035859	2134.3	5207.31	2.43982	0	238	DEG	Group 3 vs 1	1640500_at	2134.3	2840.95	1.33109	0	547	DEG_FC<1.5/-1.143	Group 3 vs 2	1640500_at	5207.31	2840.95	-1.83295	0	295	DEG	1640500_at	CG13678	---	chr3L:8215242-8216051 (+) // 100.0 //	---	---	0005515 // protein binding // inferred from physical interaction
Group 2 vs 1	1631718_at	mRpL12	FBgn0011787	837.935	2037.89	2.43204	0	239	DEG	Group 3 vs 1	1631718_at	837.935	1304.74	1.55709	0	387	DEG	Group 3 vs 2	1631718_at	2037.89	1304.74	-1.56191	0	416	DEG	1631718_at	mRpL12	mitochondrial ribosomal protein L12	chr3L:8949891-8950682 (+) // 100.0 //	0006412 // translation // inferred from sequence or structural similarity /// 0006412 // translation // inferred from electronic annotation /// 0007005 // mitochondrion organization and biogenesis // inferred from mutant phenotype /// 0016049 // cell growth // inferred from mutant phenotype	0005622 // intracellular // inferred from electronic annotation /// 0005762 // mitochondrial large ribosomal subunit // inferred from sequence or structural similarity /// 0005763 // mitochondrial small ribosomal subunit // inferred from sequence or structural similarity /// 0005811 // lipid particle // inferred from direct assay /// 0005840 // ribosome // inferred from electronic annotation	0003682 // chromatin binding // inferred from genetic interaction /// 0003735 // structural constituent of ribosome // inferred from sequence or structural similarity /// 0003735 // structural constituent of ribosome // inferred from electronic annotation /// 0005515 // protein binding // inferred from physical interaction
Group 2 vs 1	1629478_at	mRpS18A	FBgn0051450	544.825	1321.47	2.42549	0	240	DEG	Group 3 vs 1	1629478_at	544.825	793.841	1.45706	0.00515737	1585	DEG_FC<1.5/-1.1101	Group 3 vs 2	1629478_at	1321.47	793.841	-1.66465	0.00113074	868	DEG	1629478_at	mRpS18A	mitochondrial ribosomal protein S18A	chr3R:4387627-4388305 (-) // 100.0 //	0006412 // translation // inferred from sequence or structural similarity /// 0006412 // translation // inferred from electronic annotation	0005622 // intracellular // inferred from electronic annotation /// 0005763 // mitochondrial small ribosomal subunit // inferred from sequence or structural similarity /// 0005840 // ribosome // inferred from electronic annotation	0003735 // structural constituent of ribosome // inferred from sequence or structural similarity /// 0003735 // structural constituent of ribosome // inferred from electronic annotation /// 0005515 // protein binding // inferred from physical interaction
Group 2 vs 1	1637077_s_at	CG3777	FBgn0024989	1207.22	2918.87	2.41785	0	241	DEG	Group 3 vs 1	1637077_s_at	1207.22	2172.86	1.79989	0	301	DEG	Group 3 vs 2	1637077_s_at	2918.87	2172.86	-1.34333	0	581	DEG<1.5/-1.127	1637077_s_at	CG3777	---	chrX:173735-244237 (+) // 100.0 //	---	---	---
Group 2 vs 1	1631472_at	Cht4	FBgn0022700	892.075	2154.57	2.41523	0	242	DEG	Group 3 vs 1	1631472_at	892.075	2818.67	3.15968	0	158	DEG	Group 3 vs 2	1631472_at	2154.57	2818.67	1.30823	0	626	DEG<1.5/-1.172	1631472_at	Cht4	Chitinase 4	chr2R:16952884-16954592 (-) // 100.0 //	0005975 // carbohydrate metabolic process // inferred from electronic annotation /// 0006030 // chitin metabolic process // inferred from electronic annotation /// 0006032 // chitin catabolic process // inferred from electronic annotation /// 0006036 // cuticle chitin catabolic process // inferred from sequence or structural similarity /// 0008152 // metabolic process // inferred from electronic …	0005576 // extracellular region // inferred from electronic annotation	0003824 // catalytic activity // inferred from electronic annotation /// 0004553 // hydrolase activity, hydrolyzing O-glycosyl compounds // inferred from electronic annotation /// 0004568 // chitinase activity // inferred from sequence or structural similarity /// 0004568 // chitinase activity // non-traceable author statement /// 0004568 // chitinase activity // inferred from electronic annotati…
Group 2 vs 1	1628279_s_at	CG11076	FBgn0039929	622.575	1501.56	2.41186	0	243	DEG	Group 3 vs 1	1628279_s_at	622.575	760.964	1.22229	0.0316743	2062	DEG_FC<1.5/-1.2399	Group 3 vs 2	1628279_s_at	1501.56	760.964	-1.97324	0	252	DEG	1628279_s_at	CG11076	---	chr4:1050334-1052286 (-) // 100.0 //	---	---	0005515 // protein binding // inferred from physical interaction
Group 2 vs 1	1624398_at	CG8630	FBgn0038130	1205.32	2883.71	2.39248	0	244	DEG	Group 3 vs 1	1624398_at	1205.32	1599.59	1.3271	0.00257776	1498	DEG_FC<1.5/-1.780	Group 3 vs 2	1624398_at	2883.71	1599.59	-1.80278	0	309	DEG	1624398_at	CG8630	---	chr3R:9105444-9110316 (+) // 100.0 //	0006629 // lipid metabolic process // inferred from electronic annotation /// 0006633 // fatty acid biosynthetic process // inferred from electronic annotation /// 0008610 // lipid biosynthetic process // inferred from electronic annotation /// 0055114 // oxidation reduction // inferred from electronic annotation	0005783 // endoplasmic reticulum // inferred from electronic annotation /// 0016020 // membrane // inferred from electronic annotation /// 0016021 // integral to membrane // inferred from electronic annotation	0004768 // stearoyl-CoA 9-desaturase activity // inferred from sequence or structural similarity /// 0004768 // stearoyl-CoA 9-desaturase activity // inferred from electronic annotation /// 0005506 // iron ion binding // inferred from electronic annotation /// 0005515 // protein binding // inferred from physical interaction /// 0016491 // oxidoreductase activity // inferred from electronic annota…
Group 2 vs 1	1637914_at	Obp83g	FBgn0046875	1439.91	3443.47	2.39145	0	245	DEG	Group 3 vs 1	1637914_at	1439.91	2612.51	1.81435	0	296	DEG	Group 3 vs 2	1637914_at	3443.47	2612.51	-1.31807	0	612	DEG<1.5/-1.158	1637914_at	Obp83g	Odorant-binding protein 83g	chr3R:1937391-1938019 (-) // 100.0 //	0006810 // transport // inferred from electronic annotation /// 0007606 // sensory perception of chemical stimulus // inferred from sequence or structural similarity	---	0005549 // odorant binding // inferred from sequence or structural similarity /// 0005549 // odorant binding // non-traceable author statement /// 0005549 // odorant binding // inferred from electronic annotation
Group 2 vs 1	1641681_s_at	CG5288 /// DsecCG5288	FBgn0035950	1282.48	541.533	-2.36824	0	246	DEG	Group 3 vs 1	1641681_s_at	1282.48	820.755	-1.56256	0	385	DEG	Group 3 vs 2	1641681_s_at	541.533	820.755	1.51561	0	441	DEG	1641681_s_at	CG5288 /// DsecCG5288	--- /// ---	chr3L:8976241-8979189 (-) // 100.0 //	0006012 // galactose metabolic process // inferred from electronic annotation /// 0008152 // metabolic process // inferred from electronic annotation /// 0016310 // phosphorylation // inferred from electronic annotation /// 0046835 // carbohydrate phosphorylation // inferred from electronic annotation	0005737 // cytoplasm // inferred from electronic annotation	0000166 // nucleotide binding // inferred from electronic annotation /// 0004335 // galactokinase activity // inferred from sequence or structural similarity /// 0004335 // galactokinase activity // inferred from electronic annotation /// 0005515 // protein binding // inferred from physical interaction /// 0005524 // ATP binding // inferred from electronic annotation /// 0016301 // kinase activit…
Group 2 vs 1	1626086_at	CG10621	FBgn0032726	2189.68	924.915	-2.36744	0	247	DEG	Group 3 vs 1	1626086_at	2189.68	1462.54	-1.49717	0	410	DEG_FC<1.5/-1.6	Group 3 vs 2	1626086_at	924.915	1462.54	1.58127	0	405	DEG	1626086_at	CG10621	selenocysteine methyltransferase	chr2L:18952205-18954421 (-) // 100.0 //	---	---	0005515 // protein binding // inferred from physical interaction /// 0008168 // methyltransferase activity // inferred from electronic annotation /// 0008898 // homocysteine S-methyltransferase activity // inferred from electronic annotation /// 0016205 // selenocysteine methyltransferase activity // inferred from sequence or structural similarity /// 0016740 // transferase activity // inferred f…
Group 2 vs 1	1632345_at	CG8353	FBgn0032002	1687.02	713.525	-2.36434	0	248	DEG	Group 3 vs 1	1632345_at	1687.02	1519.9	-1.10995	0.0181078		nonDEG	Group 3 vs 2	1632345_at	713.525	1519.9	2.13013	0	218	DEG	1632345_at	CG8353	---	chr2L:8214304-8215240 (+) // 100.0 //	0046087 // cytidine metabolic process // inferred from electronic annotation	---	0003824 // catalytic activity // inferred from electronic annotation /// 0004126 // cytidine deaminase activity // inferred from sequence or structural similarity /// 0004126 // cytidine deaminase activity // inferred from electronic annotation /// 0008270 // zinc ion binding // inferred from electronic annotation /// 0016787 // hydrolase activity // inferred from electronic annotation
Group 2 vs 1	1628240_at	CG4825 /// DsecGM22203	FBgn0037010	559.829	1320.47	2.3587	0	249	DEG	Group 3 vs 1	1628240_at	559.829	722.235	1.2901	0.0145387	1820	DEG_FC<1.5/-1.1710	Group 3 vs 2	1628240_at	1320.47	722.235	-1.82831	0	298	DEG	1628240_at	CG4825 /// DsecGM22203	Phosphatidylserine synthase /// ---	chr3L:20515530-20519281 (-) // 100.0 //	0006659 // phosphatidylserine biosynthetic process // inferred from electronic annotation	---	0003882 // CDP-diacylglycerol-serine O-phosphatidyltransferase activity // inferred from sequence or structural similarity /// 0003882 // CDP-diacylglycerol-serine O-phosphatidyltransferase activity // inferred from electronic annotation /// 0016740 // transferase activity // inferred from electronic annotation
Group 2 vs 1	1634143_at	Cyp6w1	FBgn0033065	2522.02	5937.23	2.35416	0	250	DEG	Group 3 vs 1	1634143_at	2522.02	5657.29	2.24316	0	227	DEG	Group 3 vs 2	1634143_at	5937.23	5657.29	-1.04948	0.023734		nonDEG	1634143_at	Cyp6w1	Cyp6w1	chr2R:2061200-2062947 (+) // 100.0 //	0055114 // oxidation reduction // inferred from electronic annotation	0005783 // endoplasmic reticulum // inferred from electronic annotation /// 0005789 // endoplasmic reticulum membrane // inferred from electronic annotation /// 0005792 // microsome // non-traceable author statement /// 0005792 // microsome // inferred from electronic annotation /// 0016020 // membrane // non-traceable author statement /// 0016020 // membrane // inferred from electronic annotation	0004497 // monooxygenase activity // inferred from electronic annotation /// 0005506 // iron ion binding // inferred from electronic annotation /// 0009055 // electron carrier activity // inferred from electronic annotation /// 0009055 // electron carrier activity // inferred from sequence or structural similarity /// 0009055 // electron carrier activity // non-traceable author statement /// 0016…
Group 2 vs 1	1627169_at	CG3264	FBgn0034712	1031.04	2415.2	2.3425	0	251	DEG	Group 3 vs 1	1627169_at	1031.04	616.718	-1.67181	0	350	DEG	Group 3 vs 2	1627169_at	2415.2	616.718	-3.91622	0	94	DEG	1627169_at	CG3264	---	chr2R:18096506-18098247 (-) // 100.0 //	0008152 // metabolic process // inferred from electronic annotation	---	0000287 // magnesium ion binding // inferred from electronic annotation /// 0003824 // catalytic activity // inferred from electronic annotation /// 0004035 // alkaline phosphatase activity // inferred from sequence or structural similarity /// 0004035 // alkaline phosphatase activity // inferred from electronic annotation /// 0008270 // zinc ion binding // inferred from electronic annotation ///…
Group 2 vs 1	1623292_at	CG33128	FBgn0053128	6201.09	2654.38	-2.33617	0	252	DEG	Group 3 vs 1	1623292_at	6201.09	3479.34	-1.78226	0	308	DEG	Group 3 vs 2	1623292_at	2654.38	3479.34	1.31079	0	622	DEG<1.5/-1.168	1623292_at	CG33128	aspartic-type endopeptidase	chr2L:1494089-1495458 (+) // 100.0 //	0006508 // proteolysis // inferred from electronic annotation	---	0004190 // aspartic-type endopeptidase activity // non-traceable author statement /// 0004190 // aspartic-type endopeptidase activity // inferred from electronic annotation /// 0008233 // peptidase activity // inferred from electronic annotation /// 0016787 // hydrolase activity // inferred from electronic annotation
Group 2 vs 1	1627771_at	CG13075	FBgn0036563	681.762	1587.63	2.32872	0	253	DEG	Group 3 vs 1	1627771_at	681.762	718.419	1.05377			nonDEG	Group 3 vs 2	1627771_at	1587.63	718.419	-2.2099	0	202	DEG	1627771_at	CG13075	---	chr3L:16077135-16078278 (+) // 100.0 //	0006030 // chitin metabolic process // inferred from electronic annotation	0005576 // extracellular region // inferred from electronic annotation	0005515 // protein binding // inferred from physical interaction /// 0008061 // chitin binding // inferred from electronic annotation
Group 2 vs 1	1633959_s_at	CG30345 /// CG9766 /// DsimCG9766	FBgn0037229	975.906	419.179	-2.32814	0	254	DEG	Group 3 vs 1	1633959_s_at	975.906	330.775	-2.95036	0	167	DEG	Group 3 vs 2	1633959_s_at	419.179	330.775	-1.26726	0.041143	2449	DEG<1.5/-1.649	1633959_s_at	CG30345 /// CG9766 /// DsimCG9766	--- /// --- /// ---	chr2RHet:30696-37111 (+) // 99.73 // /// chr3LHet:742023-748179 (+) // 90.11 // /// chr2R:5038861-5045274 (+) // 99.78 // /// chr2R:3703231-3709643 (+) // 99.72 // /// chr3R:16092292-16098706 (+) // 99.75 // /// chr3R:1271737-1278140 (+) // 99.56 // /// chr3RHet:1175743-1182074 (-) // 98.46 // /// chr2L:21691881-21698294 (-) // 99.72 // /// chrX:11429128-11435541 (-) // 99.75 // /// chr3R:96511-1…	0006810 // transport // inferred from electronic annotation	0016020 // membrane // inferred from electronic annotation	0005215 // transporter activity // inferred from electronic annotation
Group 2 vs 1	1634572_at	CG6459	FBgn0034259	1861.94	4325.39	2.32306	0	255	DEG	Group 3 vs 1	1634572_at	1861.94	2264.41	1.21616	0.00420773	1545	DEG_FC<1.5/-1.1004	Group 3 vs 2	1634572_at	4325.39	2264.41	-1.91016	0	278	DEG	1634572_at	CG6459	---	chr2R:13558815-13560140 (-) // 100.0 //	---	0005739 // mitochondrion // inferred from sequence or structural similarity /// 0005759 // mitochondrial matrix // inferred from sequence or structural similarity /// 0005759 // mitochondrial matrix // inferred from electronic annotation	---
Group 2 vs 1	1640400_at	CG5773	FBgn0034290	5602.35	2413.86	-2.3209	0	256	DEG	Group 3 vs 1	1640400_at	5602.35	3341.78	-1.67646	0	349	DEG	Group 3 vs 2	1640400_at	2413.86	3341.78	1.38441	0	530	DEG<1.5/-1.76	1640400_at	CG5773	---	chr2R:13930408-13931249 (-) // 100.0 //	---	---	---
Group 2 vs 1	1640898_at	DNaseII	FBgn0000477	955.037	411.792	-2.31922	0	257	DEG	Group 3 vs 1	1640898_at	955.037	712.245	-1.34088	0.00243455	1473	DEG_FC<1.5/-1.652	Group 3 vs 2	1640898_at	411.792	712.245	1.72962	0	334	DEG	1640898_at	DNaseII	acid DNase	chr3R:13845098-13846883 (+) // 100.0 //	0006259 // DNA metabolic process // inferred from electronic annotation /// 0006308 // DNA catabolic process // traceable author statement	---	0004531 // deoxyribonuclease II activity // inferred from sequence or structural similarity /// 0004531 // deoxyribonuclease II activity // non-traceable author statement /// 0004531 // deoxyribonuclease II activity // traceable author statement /// 0004531 // deoxyribonuclease II activity // inferred from electronic annotation /// 0005515 // protein binding // inferred from physical interaction …
Group 2 vs 1	1639118_a_at	Hrb87F	FBgn0004237	925.586	2143.42	2.31574	0	258	DEG	Group 3 vs 1	1639118_a_at	925.586	1948.71	2.10538	0	249	DEG	Group 3 vs 2	1639118_a_at	2143.42	1948.71	-1.09992	0.0159787		nonDEG	1639118_a_at	Hrb87F	Heterogeneous nuclear ribonucleoprotein at 85CD	chr3R:9483044-9486241 (-) // 100.0 //	0000381 // regulation of alternative nuclear mRNA splicing, via spliceosome // inferred from mutant phenotype	0000785 // chromatin // inferred from direct assay /// 0005634 // nucleus // inferred by curator /// 0005634 // nucleus // inferred from direct assay /// 0005634 // nucleus // inferred from electronic annotation /// 0005654 // nucleoplasm // inferred from direct assay /// 0005703 // polytene chromosome puff // inferred from direct assay /// 0005737 // cytoplasm // inferred from electronic annotat…	0000166 // nucleotide binding // inferred from electronic annotation /// 0003676 // nucleic acid binding // inferred from electronic annotation /// 0003723 // RNA binding // inferred from electronic annotation /// 0003729 // mRNA binding // inferred from sequence or structural similarity /// 0003729 // mRNA binding // non-traceable author statement /// 0005515 // protein binding // inferred from …
Group 2 vs 1	1630453_at	CG32267	FBgn0052267	1200.44	2777.69	2.3139	0	259	DEG	Group 3 vs 1	1630453_at	1200.44	2068.02	1.72272	0	333	DEG	Group 3 vs 2	1630453_at	2777.69	2068.02	-1.34317	0	582	DEG<1.5/-1.128	1630453_at	CG32267	---	chr3L:3471542-3472113 (-) // 100.0 //	---	---	---
Group 2 vs 1	1632964_at	pirk	FBgn0034647	2562.68	1109.15	-2.3105	0	260	DEG	Group 3 vs 1	1632964_at	2562.68	1004.48	-2.55125	0	198	DEG	Group 3 vs 2	1632964_at	1109.15	1004.48	-1.1042	0.122743		nonDEG	1632964_at	pirk	CG15678	chr2R:17548471-17549749 (-) // 100.0 //	---	---	---
Group 2 vs 1	1641610_at	Mur18B	FBgn0030999	2359.65	1029.3	-2.29247	0	261	DEG	Group 3 vs 1	1641610_at	2359.65	837.166	-2.81861	0	178	DEG	Group 3 vs 2	1641610_at	1029.3	837.166	-1.22951	0.0231764	2023	DEG<1.5/-1.845	1641610_at	Mur18B	Mucin related 18B	chrX:19107289-19108971 (+) // 100.0 //	0006030 // chitin metabolic process // inferred from electronic annotation	0005576 // extracellular region // inferred from electronic annotation	0008061 // chitin binding // inferred from electronic annotation
Group 2 vs 1	1629201_at	CG5550	FBgn0034160	3082.19	1344.68	-2.29214	0	262	DEG	Group 3 vs 1	1629201_at	3082.19	611.905	-5.03704	0	95	DEG	Group 3 vs 2	1629201_at	1344.68	611.905	-2.19752	0	206	DEG	1629201_at	CG5550	Fibrinogen-like	chr2R:12704095-12705086 (+) // 100.0 //	0007165 // signal transduction // inferred from electronic annotation	0005578 // proteinaceous extracellular matrix // inferred from sequence or structural similarity	0005102 // receptor binding // inferred from electronic annotation
Group 2 vs 1	1632802_at	JhI-26	FBgn0028424	2322.51	1015.31	-2.28748	0	263	DEG	Group 3 vs 1	1632802_at	2322.51	1250.67	-1.85702	0	290	DEG	Group 3 vs 2	1632802_at	1015.31	1250.67	1.2318	0.00102845	821	DEG<1.5/-1.831	1632802_at	JhI-26	Juvenile hormone-inducible protein 26	chr2R:12176829-12178835 (+) // 100.0 //	---	---	---
Group 2 vs 1	1639295_at	CG4734	FBgn0033826	10665.9	4679.15	-2.27945	0	264	DEG	Group 3 vs 1	1639295_at	10665.9	5998.15	-1.7782	0	310	DEG	Group 3 vs 2	1639295_at	4679.15	5998.15	1.28189	0	655	DEG<1.5/-1.201	1639295_at	CG4734	---	chr2R:9184739-9185972 (-) // 100.0 //	---	---	---
Group 2 vs 1	1629598_at	FK506-bp1	FBgn0013269	1144.92	2597.48	2.2687	0	265	DEG	Group 3 vs 1	1629598_at	1144.92	1577.1	1.37748	0	491	DEG_FC<1.5/-1.87	Group 3 vs 2	1629598_at	2597.48	1577.1	-1.647	0	370	DEG	1629598_at	FK506-bp1	FK506-binding protein 1	chr3R:11157305-11158864 (-) // 100.0 //	0006457 // protein folding // inferred from sequence or structural similarity /// 0006457 // protein folding // non-traceable author statement /// 0006457 // protein folding // inferred from electronic annotation	0005634 // nucleus // inferred from sequence or structural similarity /// 0005634 // nucleus // non-traceable author statement /// 0005634 // nucleus // inferred from electronic annotation	0003755 // peptidyl-prolyl cis-trans isomerase activity // inferred from sequence or structural similarity /// 0003755 // peptidyl-prolyl cis-trans isomerase activity // non-traceable author statement /// 0003755 // peptidyl-prolyl cis-trans isomerase activity // inferred from electronic annotation /// 0005528 // FK506 binding // inferred from direct assay /// 0005528 // FK506 binding // inferred…
Group 2 vs 1	1633305_at	Obp99a	FBgn0039678	825.769	364.108	-2.26792	0	266	DEG	Group 3 vs 1	1633305_at	825.769	814.798	-1.01346			nonDEG	Group 3 vs 2	1633305_at	364.108	814.798	2.23779	0	196	DEG	1633305_at	Obp99a	Odorant-binding protein 99a	chr3R:25497381-25498057 (+) // 100.0 //	0006810 // transport // inferred from electronic annotation /// 0007606 // sensory perception of chemical stimulus // inferred from sequence or structural similarity /// 0007608 // sensory perception of smell // inferred from electronic annotation /// 0019236 // response to pheromone // inferred from sequence or structural similarity /// 0042048 // olfactory behavior // inferred from sequence or …	0005576 // extracellular region // inferred from sequence or structural similarity /// 0005576 // extracellular region // inferred from electronic annotation	0005515 // protein binding // inferred from physical interaction /// 0005549 // odorant binding // inferred from sequence or structural similarity /// 0005549 // odorant binding // non-traceable author statement /// 0005549 // odorant binding // inferred from electronic annotation
Group 2 vs 1	1623588_at	EfTuM	FBgn0024556	788.285	1783.63	2.26268	0	267	DEG	Group 3 vs 1	1623588_at	788.285	1159.47	1.47088	0.000962862	1359	DEG_FC<1.5/-1.454	Group 3 vs 2	1623588_at	1783.63	1159.47	-1.53832	0	427	DEG	1623588_at	EfTuM	Elongation factor Tu mitochondrial	chr2R:9395062-9396838 (+) // 100.0 //	0006414 // translational elongation // inferred from sequence or structural similarity /// 0006414 // translational elongation // inferred from electronic annotation	0005622 // intracellular // inferred from electronic annotation /// 0005739 // mitochondrion // inferred from sequence or structural similarity	0000166 // nucleotide binding // inferred from electronic annotation /// 0003746 // translation elongation factor activity // inferred from sequence or structural similarity /// 0003746 // translation elongation factor activity // inferred from electronic annotation /// 0003924 // GTPase activity // inferred from electronic annotation /// 0005525 // GTP binding // inferred from electronic annotat…
Group 2 vs 1	1624206_at	CG11300	FBgn0034901	3041.9	6868.8	2.25807	0	268	DEG	Group 3 vs 1	1624206_at	3041.9	4846.22	1.59316	0	374	DEG	Group 3 vs 2	1624206_at	6868.8	4846.22	-1.41735	0	504	DEG<1.5/-1.50	1624206_at	CG11300	---	chr2R:19639466-19640020 (+) // 100.0 //	---	---	0005515 // protein binding // inferred from physical interaction
Group 2 vs 1	1636470_at	CG34026	FBgn0054026	3174.58	1416.8	-2.24067	0	269	DEG	Group 3 vs 1	1636470_at	3174.58	1743.85	-1.82044	0	295	DEG	Group 3 vs 2	1636470_at	1416.8	1743.85	1.23084	0.00255572	1048	DEG<1.5/-1.835	1636470_at	CG34026	---	chrX:9426641-9428291 (+) // 100.0 //	---	---	---
Group 2 vs 1	1624578_at	spheroide	FBgn0030774	1683.62	751.698	-2.23975	0	270	DEG	Group 3 vs 1	1624578_at	1683.62	476.77	-3.5313	0	141	DEG	Group 3 vs 2	1624578_at	751.698	476.77	-1.57665	0.0061154	1346	DEG	1624578_at	spheroide	CG9675	chrX:16594478-16595989 (-) // 100.0 //	0006508 // proteolysis // inferred from electronic annotation /// 0045087 // innate immune response // inferred from mutant phenotype /// 0050830 // defense response to Gram-positive bacterium // inferred from mutant phenotype /// 0050832 // defense response to fungus // inferred from mutant phenotype	---	0003824 // catalytic activity // inferred from electronic annotation /// 0004252 // serine-type endopeptidase activity // inferred from electronic annotation /// 0004252 // serine-type endopeptidase activity // non-traceable author statement /// 0005515 // protein binding // inferred from physical interaction
Group 2 vs 1	1630750_at	CG5323	FBgn0034362	799.012	1786.35	2.2357	0	271	DEG	Group 3 vs 1	1630750_at	799.012	1068.08	1.33675	0.00474779	1567	DEG_FC<1.5/-1.1050	Group 3 vs 2	1630750_at	1786.35	1068.08	-1.67249	0	353	DEG	1630750_at	CG5323	---	chr2R:14502585-14503504 (+) // 100.0 //	---	---	---
Group 2 vs 1	1625894_at	CG11370	FBgn0037181	3362.86	7461.85	2.2189	0	272	DEG	Group 3 vs 1	1625894_at	3362.86	4201.53	1.24939	0	636	DEG_FC<1.5/-1.232	Group 3 vs 2	1625894_at	7461.85	4201.53	-1.77598	0	317	DEG	1625894_at	CG11370	---	chr3L:22705256-22706763 (+) // 100.0 //	---	---	---
Group 2 vs 1	1634278_at	CG6409	FBgn0036106	1234.41	2737.72	2.21783	0	273	DEG	Group 3 vs 1	1634278_at	1234.41	3262.92	2.64329	0	190	DEG	Group 3 vs 2	1634278_at	2737.72	3262.92	1.19184	0		nonDEG	1634278_at	CG6409	---	chr3L:10873798-10875151 (-) // 99.59 //	0006506 // GPI anchor biosynthetic process // inferred from sequence or structural similarity	0005783 // endoplasmic reticulum // inferred from sequence or structural similarity	---
Group 2 vs 1	1632531_at	CG5770	FBgn0034291	2500.06	1132.21	-2.20812	0	274	DEG	Group 3 vs 1	1632531_at	2500.06	1683.88	-1.4847	0	415	DEG_FC<1.5/-1.11	Group 3 vs 2	1632531_at	1132.21	1683.88	1.48725	0	467	DEG<1.5/-1.13	1632531_at	CG5770	---	chr2R:13931550-13932565 (-) // 100.0 //	---	---	---
Group 2 vs 1	1631149_s_at	La	FBgn0011638	796.049	1755.6	2.20539	0	275	DEG	Group 3 vs 1	1631149_s_at	796.049	1025.6	1.28837	0.0104978	1740	DEG_FC<1.5/-1.1503	Group 3 vs 2	1631149_s_at	1755.6	1025.6	-1.71177	0	338	DEG	1631149_s_at	La	ribonucleoprotein La	chr2L:20348390-20350328 (-) // 100.0 //	0006396 // RNA processing // inferred from electronic annotation	0005634 // nucleus // inferred from electronic annotation /// 0005634 // nucleus // non-traceable author statement /// 0030529 // ribonucleoprotein complex // inferred from electronic annotation	0000166 // nucleotide binding // inferred from electronic annotation /// 0003676 // nucleic acid binding // inferred from electronic annotation /// 0003677 // DNA binding // inferred from electronic annotation /// 0003718 // RNA polymerase III transcription termination factor activity // inferred from sequence or structural similarity /// 0003718 // RNA polymerase III transcription termination fa…
Group 2 vs 1	1629705_at	CG6084	FBgn0086254	646.42	1423.81	2.20261	0	276	DEG	Group 3 vs 1	1629705_at	646.42	1251.53	1.9361	0	278	DEG	Group 3 vs 2	1629705_at	1423.81	1251.53	-1.13766	0.0321937		nonDEG	1629705_at	CG6084	ESTS:34F4T	chr3L:11613632-11617481 (-) // 100.0 //	0055114 // oxidation reduction // inferred from electronic annotation	---	0004032 // aldehyde reductase activity // inferred from electronic annotation /// 0016491 // oxidoreductase activity // inferred from electronic annotation
Group 2 vs 1	1633558_s_at	CG14997	FBgn0035515	695.508	1523.31	2.19021	0	277	DEG	Group 3 vs 1	1633558_s_at	695.508	1560.22	2.24328	0	226	DEG	Group 3 vs 2	1633558_s_at	1523.31	1560.22	1.02423			nonDEG	1633558_s_at	CG14997	---	chr3L:4240172-4242603 (+) // 100.0 //	---	---	---
Group 2 vs 1	1632852_s_at	Gs1	FBgn0001142	1351.82	2958.22	2.18833	0	278	DEG	Group 3 vs 1	1632852_s_at	1351.82	2722.71	2.01411	0	266	DEG	Group 3 vs 2	1632852_s_at	2958.22	2722.71	-1.0865	0.0474511		nonDEG	1632852_s_at	Gs1	glutamine synthetase I	chr2L:132059-134472 (+) // 100.0 //	0006541 // glutamine metabolic process // non-traceable author statement /// 0006542 // glutamine biosynthetic process // inferred from electronic annotation /// 0006807 // nitrogen compound metabolic process // inferred from electronic annotation	0005739 // mitochondrion // inferred from direct assay /// 0005739 // mitochondrion // non-traceable author statement /// 0005739 // mitochondrion // inferred from electronic annotation /// 0005811 // lipid particle // inferred from direct assay	0003824 // catalytic activity // inferred from electronic annotation /// 0004356 // glutamate-ammonia ligase activity // inferred from direct assay /// 0004356 // glutamate-ammonia ligase activity // inferred from sequence or structural similarity /// 0004356 // glutamate-ammonia ligase activity // non-traceable author statement /// 0004356 // glutamate-ammonia ligase activity // inferred from el…
Group 2 vs 1	1623659_at	Obp56d	FBgn0034470	2005.74	4346.4	2.16699	0	279	DEG	Group 3 vs 1	1623659_at	2005.74	3892.75	1.94081	0	276	DEG	Group 3 vs 2	1623659_at	4346.4	3892.75	-1.11654	0.00996261		nonDEG	1623659_at	Obp56d	Odorant-binding protein 56d	chr2R:15590643-15591300 (-) // 98.49 //	0006810 // transport // inferred from electronic annotation /// 0007606 // sensory perception of chemical stimulus // inferred from sequence or structural similarity /// 0007608 // sensory perception of smell // inferred from electronic annotation /// 0007608 // sensory perception of smell // inferred from expression pattern /// 0019236 // response to pheromone // inferred from sequence or struct…	0005576 // extracellular region // inferred from sequence or structural similarity /// 0005576 // extracellular region // inferred from electronic annotation	0005515 // protein binding // inferred from physical interaction /// 0005549 // odorant binding // inferred from sequence or structural similarity /// 0005549 // odorant binding // inferred from electronic annotation /// 0005549 // odorant binding // non-traceable author statement
Group 2 vs 1	1640075_a_at	path	FBgn0036007	1619.11	748.54	-2.16302	0	280	DEG	Group 3 vs 1	1640075_a_at	1619.11	969.252	-1.67048	0	351	DEG	Group 3 vs 2	1640075_a_at	748.54	969.252	1.29486	0.000983176	801	DEG<1.5/-1.535	1640075_a_at	path	pathetic	chr3L:9487633-9498429 (-) // 100.0 //	0006865 // amino acid transport // inferred from sequence or structural similarity /// 0040007 // growth // inferred from mutant phenotype /// 0040008 // regulation of growth // non-traceable author statement	0016020 // membrane // inferred from electronic annotation /// 0016021 // integral to membrane // inferred from electronic annotation	0015171 // amino acid transmembrane transporter activity // inferred from sequence or structural similarity /// 0015171 // amino acid transmembrane transporter activity // non-traceable author statement
Group 2 vs 1	1627661_at	Dph5	FBgn0024558	746.97	1611.52	2.15741	0	281	DEG	Group 3 vs 1	1627661_at	746.97	982.588	1.31543	0.00621911	1626	DEG_FC<1.5/-1.1197	Group 3 vs 2	1627661_at	1611.52	982.588	-1.64008	0	375	DEG	1627661_at	Dph5	Diphthamide methyltransferase	chr3R:18407748-18408950 (-) // 100.0 //	0008152 // metabolic process // inferred from electronic annotation /// 0017183 // peptidyl-diphthamide biosynthetic process from peptidyl-histidine // inferred from sequence or structural similarity /// 0017183 // peptidyl-diphthamide biosynthetic process from peptidyl-histidine // inferred from electronic annotation	---	0004164 // diphthine synthase activity // inferred from sequence or structural similarity /// 0004164 // diphthine synthase activity // inferred from electronic annotation /// 0008168 // methyltransferase activity // inferred from electronic annotation /// 0016740 // transferase activity // inferred from electronic annotation
Group 2 vs 1	1628810_at	CG15597	FBgn0037420	1105.73	2383.31	2.15541	0	282	DEG	Group 3 vs 1	1628810_at	1105.73	1687.5	1.52614	0	399	DEG	Group 3 vs 2	1628810_at	2383.31	1687.5	-1.41233	0	506	DEG<1.5/-1.52	1628810_at	CG15597	---	chr3R:2110372-2110976 (-) // 100.0 //	---	---	0005515 // protein binding // inferred from physical interaction
Group 2 vs 1	1635848_at	Inos	FBgn0025885	1772.49	824.023	-2.15102	0	283	DEG	Group 3 vs 1	1635848_at	1772.49	824.024	-2.15102	0	238	DEG	Group 3 vs 2	1635848_at	824.023	824.024	1			nonDEG	1635848_at	Inos	myo-inositol-1-phosphate-synthase	chr2R:3342095-3346378 (-) // 100.0 //	0006021 // inositol biosynthetic process // inferred from sequence or structural similarity /// 0006021 // inositol biosynthetic process // inferred from electronic annotation /// 0008152 // metabolic process // inferred from electronic annotation /// 0008654 // phospholipid biosynthetic process // inferred from electronic annotation	0005737 // cytoplasm // inferred from sequence or structural similarity /// 0005737 // cytoplasm // inferred from electronic annotation	0003824 // catalytic activity // inferred from electronic annotation /// 0004512 // inositol-3-phosphate synthase activity // inferred from direct assay /// 0004512 // inositol-3-phosphate synthase activity // inferred from sequence or structural similarity /// 0004512 // inositol-3-phosphate synthase activity // non-traceable author statement /// 0004512 // inositol-3-phosphate synthase activity…
Group 2 vs 1	1635725_a_at	unc-115	FBgn0037733	1399.07	650.722	-2.15003	0	284	DEG	Group 3 vs 1	1635725_a_at	1399.07	638.366	-2.19165	0	235	DEG	Group 3 vs 2	1635725_a_at	650.722	638.366	-1.01936			nonDEG	1635725_a_at	unc-115	unc-115	chr3R:5512781-5517563 (-) // 100.0 // /// chr3R:5520101-5525449 (-) // 100.0 //	0007010 // cytoskeleton organization and biogenesis // inferred from electronic annotation	---	0003779 // actin binding // inferred from electronic annotation /// 0003779 // actin binding // non-traceable author statement /// 0005515 // protein binding // inferred from physical interaction /// 0008270 // zinc ion binding // inferred from electronic annotation /// 0046872 // metal ion binding // inferred from electronic annotation
Group 2 vs 1	1627388_at	Lcp65Ag3	FBgn0086611	4059.34	8721.74	2.14856	0	285	DEG	Group 3 vs 1	1627388_at	4059.34	6476.07	1.59535	0	372	DEG	Group 3 vs 2	1627388_at	8721.74	6476.07	-1.34676	0	570	DEG<1.5/-1.116	1627388_at	Lcp65Ag3	Larval cuticle protein	chr3L:6123484-6124086 (-) // 100.0 //	---	---	0005214 // structural constituent of chitin-based cuticle // inferred from sequence or structural similarity /// 0042302 // structural constituent of cuticle // inferred from electronic annotation
Group 2 vs 1	1629963_at	sut1	FBgn0028563	1437.5	672.44	-2.13773	0	286	DEG	Group 3 vs 1	1629963_at	1437.5	1288.83	-1.11535	0.0192338		nonDEG	Group 3 vs 2	1629963_at	672.44	1288.83	1.91664	0	273	DEG	1629963_at	sut1	sugar transporter 1	chr2R:3970482-3974654 (+) // 100.0 //	0006810 // transport // inferred from electronic annotation /// 0008643 // carbohydrate transport // inferred from electronic annotation /// 0055085 // transmembrane transport // inferred from electronic annotation	0016020 // membrane // inferred from electronic annotation /// 0016021 // integral to membrane // inferred from electronic annotation	0005215 // transporter activity // inferred from electronic annotation /// 0005351 // sugar:hydrogen symporter activity // non-traceable author statement /// 0005351 // sugar:hydrogen symporter activity // inferred from electronic annotation /// 0005355 // glucose transmembrane transporter activity // inferred from sequence or structural similarity /// 0005355 // glucose transmembrane transporter…
Group 2 vs 1	1633599_a_at	Pepck	FBgn0003067	5211.84	2438.89	-2.13697	0	287	DEG	Group 3 vs 1	1633599_a_at	5211.84	3707.4	-1.40579	0	468	DEG_FC<1.5/-1.64	Group 3 vs 2	1633599_a_at	2438.89	3707.4	1.52011	0	437	DEG	1633599_a_at	Pepck	Phosphoenolpyruvate carboxykinase	chr2R:14424271-14426924 (+) // 100.0 //	0006094 // gluconeogenesis // inferred from sequence or structural similarity /// 0006094 // gluconeogenesis // non-traceable author statement /// 0006094 // gluconeogenesis // inferred from electronic annotation	0005739 // mitochondrion // inferred from sequence or structural similarity	0000166 // nucleotide binding // inferred from electronic annotation /// 0004611 // phosphoenolpyruvate carboxykinase activity // inferred from electronic annotation /// 0004613 // phosphoenolpyruvate carboxykinase (GTP) activity // inferred from sequence or structural similarity /// 0004613 // phosphoenolpyruvate carboxykinase (GTP) activity // inferred from electronic annotation /// 0005525 // …
Group 2 vs 1	1640918_at	ome	FBgn0002997	942.803	441.534	-2.13529	0	288	DEG	Group 3 vs 1	1640918_at	942.803	376.257	-2.50574	0	203	DEG	Group 3 vs 2	1640918_at	441.534	376.257	-1.17349	0.0653252		nonDEG	1640918_at	ome	omega	chr3L:14699853-14740232 (+) // 99.58 //	0006508 // proteolysis // inferred from electronic annotation	0016020 // membrane // inferred from electronic annotation	0005515 // protein binding // inferred from physical interaction /// 0008236 // serine-type peptidase activity // inferred from electronic annotation /// 0016787 // hydrolase activity // inferred from electronic annotation
Group 2 vs 1	1623459_at	Spn4	FBgn0028985	2027.22	964.76	-2.10126	0	289	DEG	Group 3 vs 1	1623459_at	2027.22	1285.6	-1.57686	0	378	DEG	Group 3 vs 2	1623459_at	964.76	1285.6	1.33256	0	599	DEG<1.5/-1.145	1623459_at	Spn4	neuroserpin	chr2R:2763651-2766428 (-) // 100.0 //	0016486 // peptide hormone processing // inferred from direct assay	0005783 // endoplasmic reticulum // inferred from electronic annotation	0004867 // serine-type endopeptidase inhibitor activity // inferred from direct assay /// 0004867 // serine-type endopeptidase inhibitor activity // inferred from sequence or structural similarity /// 0004867 // serine-type endopeptidase inhibitor activity // non-traceable author statement /// 0004867 // serine-type endopeptidase inhibitor activity // inferred from electronic annotation /// 00055…
Group 2 vs 1	1626416_a_at	l(2)efl	FBgn0011296	3524	1680.48	-2.09702	0	290	DEG	Group 3 vs 1	1626416_a_at	3524	3098.47	-1.13734	0.00718321		nonDEG	Group 3 vs 2	1626416_a_at	1680.48	3098.47	1.8438	0	292	DEG	1626416_a_at	l(2)efl	lethal (2) essential for life	chr2R:19572320-19573044 (-) // 100.0 //	0006950 // response to stress // inferred from electronic annotation /// 0007275 // multicellular organismal development // inferred from electronic annotation /// 0009408 // response to heat // non-traceable author statement /// 0009790 // embryonic development // non-traceable author statement	---	0042802 // identical protein binding // inferred from physical interaction
Group 2 vs 1	1638179_at	CG12107	FBgn0033209	815.813	1710.71	2.09694	0	291	DEG	Group 3 vs 1	1638179_at	815.813	1393.09	1.70761	0	336	DEG	Group 3 vs 2	1638179_at	1710.71	1393.09	-1.228	0.00492362	1278	DEG<1.5/-1.851	1638179_at	CG12107	---	chr2R:3561957-3562867 (+) // 100.0 //	---	---	---
Group 2 vs 1	1628076_at	Lip3	FBgn0023495	1201.99	573.334	-2.09648	0	292	DEG	Group 3 vs 1	1628076_at	1201.99	1190.72	-1.00946	0.12673		nonDEG	Group 3 vs 2	1628076_at	573.334	1190.72	2.07683	0	230	DEG	1628076_at	Lip3	Lip3	chr3R:9196032-9197474 (-) // 100.0 //	0006629 // lipid metabolic process // inferred from electronic annotation /// 0016042 // lipid catabolic process // inferred from electronic annotation	---	0003824 // catalytic activity // inferred from electronic annotation /// 0004806 // triacylglycerol lipase activity // inferred from sequence or structural similarity /// 0004806 // triacylglycerol lipase activity // non-traceable author statement /// 0016298 // lipase activity // non-traceable author statement /// 0016787 // hydrolase activity // inferred from electronic annotation
Group 2 vs 1	1630635_s_at	CG7720	FBgn0038652	2041.04	976.039	-2.09115	0	293	DEG	Group 3 vs 1	1630635_s_at	2041.04	978.181	-2.08657	0	251	DEG	Group 3 vs 2	1630635_s_at	976.039	978.181	1.00219	0.138802		nonDEG	1630635_s_at	CG7720	---	chr3R:14584955-14620876 (-) // 100.0 //	0006810 // transport // inferred from electronic annotation /// 0006811 // ion transport // inferred from electronic annotation /// 0006814 // sodium ion transport // inferred from electronic annotation	0016020 // membrane // inferred from electronic annotation /// 0016021 // integral to membrane // inferred from electronic annotation	0005215 // transporter activity // inferred from electronic annotation /// 0008507 // sodium:iodide symporter activity // inferred from sequence or structural similarity
Group 2 vs 1	1624318_at	128up	FBgn0010339	789.764	1651.39	2.091	0	294	DEG	Group 3 vs 1	1624318_at	789.764	1156.06	1.4638	0	428	DEG_FC<1.5/-1.24	Group 3 vs 2	1624318_at	1651.39	1156.06	-1.42847	0.00132199	919	DEG<1.5/-1.144	1624318_at	128up	upstream of RpIII128	chr2R:7924830-7926358 (+) // 100.0 //	---	0005622 // intracellular // inferred from electronic annotation	0000166 // nucleotide binding // inferred from electronic annotation /// 0005515 // protein binding // inferred from physical interaction /// 0005525 // GTP binding // inferred from direct assay /// 0005525 // GTP binding // inferred from sequence or structural similarity /// 0005525 // GTP binding // non-traceable author statement /// 0005525 // GTP binding // inferred from electronic annotation
Group 2 vs 1	1632222_a_at	CG9238	FBgn0036428	1825.82	874.852	-2.087	0	295	DEG	Group 3 vs 1	1632222_a_at	1825.82	1045.09	-1.74705	0	321	DEG	Group 3 vs 2	1632222_a_at	874.852	1045.09	1.19459	0.0173832		nonDEG	1632222_a_at	CG9238	---	chr3L:14534636-14544071 (-) // 99.81 //	---	---	0005515 // protein binding // inferred from physical interaction /// 0008157 // protein phosphatase 1 binding // inferred from sequence or structural similarity /// 0008599 // protein phosphatase type 1 regulator activity // inferred from sequence or structural similarity
Group 2 vs 1	1625174_at	CG15067	FBgn0034331	14225.6	6817.83	-2.08653	0	296	DEG	Group 3 vs 1	1625174_at	14225.6	98.0082	-145.147	0	12	DEG	Group 3 vs 2	1625174_at	6817.83	98.0082	-69.5639	0.023125	2020	DEG	1625174_at	CG15067	---	chr2R:14272415-14273093 (-) // 100.0 //	---	---	---
Group 2 vs 1	1626248_at	CG18547	FBgn0037973	1035.65	2157.92	2.08363	0	297	DEG	Group 3 vs 1	1626248_at	1035.65	3530.39	3.40885	0	145	DEG	Group 3 vs 2	1626248_at	2157.92	3530.39	1.63601	0	379	DEG	1626248_at	CG18547	---	chr3R:7804342-7806066 (-) // 100.0 //	---	---	0016491 // oxidoreductase activity // inferred from electronic annotation
Group 2 vs 1	1628657_at	GstE9	FBgn0063491	2274.01	4731.38	2.08064	0	298	DEG	Group 3 vs 1	1628657_at	2274.01	2697.95	1.18643	0.00100487		nonDEG	Group 3 vs 2	1628657_at	4731.38	2697.95	-1.75369	0	325	DEG	1628657_at	GstE9	Glutathione S transferase E9	chr2R:14296553-14297340 (+) // 100.0 //	0009636 // response to toxin // non-traceable author statement	---	0004364 // glutathione transferase activity // inferred from sequence or structural similarity /// 0004364 // glutathione transferase activity // non-traceable author statement /// 0004364 // glutathione transferase activity // inferred from electronic annotation /// 0016740 // transferase activity // inferred from electronic annotation
Group 2 vs 1	1629098_at	CG7631	FBgn0028945	2250.91	1083.44	-2.07757	0	299	DEG	Group 3 vs 1	1629098_at	2250.91	1662.95	-1.35357	0	520	DEG_FC<1.5/-1.116	Group 3 vs 2	1629098_at	1083.44	1662.95	1.53488	0	429	DEG	1629098_at	CG7631	---	chr2L:15628683-15629516 (+) // 100.0 //	0006508 // proteolysis // inferred from electronic annotation	---	0004222 // metalloendopeptidase activity // inferred from sequence or structural similarity /// 0008233 // peptidase activity // inferred from electronic annotation /// 0008237 // metallopeptidase activity // inferred from electronic annotation /// 0008270 // zinc ion binding // inferred from electronic annotation /// 0016787 // hydrolase activity // inferred from electronic annotation /// 004687…
Group 2 vs 1	1637403_at	CG7953	FBgn0028533	11646.9	5613.83	-2.07469	0	300	DEG	Group 3 vs 1	1637403_at	11646.9	10124.5	-1.15037	0		nonDEG	Group 3 vs 2	1637403_at	5613.83	10124.5	1.8035	0	308	DEG	1637403_at	CG7953	---	chr2L:13847942-13849165 (+) // 100.0 //	---	---	---
Group 2 vs 1	1641286_s_at	Hsp60	FBgn0015245	2681.87	5554.46	2.07112	0	301	DEG	Group 3 vs 1	1641286_s_at	2681.87	3381.31	1.26081	0	616	DEG_FC<1.5/-1.212	Group 3 vs 2	1641286_s_at	5554.46	3381.31	-1.64269	0	372	DEG	1641286_s_at	Hsp60	heat shock protein 60 kDa	chrX:11002505-11006341 (+) // 100.0 //	0006457 // protein folding // inferred from sequence or structural similarity /// 0006457 // protein folding // non-traceable author statement /// 0006457 // protein folding // inferred from electronic annotation /// 0006458 // 'de novo' protein folding // inferred from sequence or structural similarity /// 0006626 // protein targeting to mitochondrion // inferred from sequence or structural simi…	0005739 // mitochondrion // inferred from direct assay /// 0005739 // mitochondrion // inferred from electronic annotation /// 0005759 // mitochondrial matrix // inferred from sequence or structural similarity /// 0005759 // mitochondrial matrix // non-traceable author statement /// 0005759 // mitochondrial matrix // inferred from electronic annotation /// 0005811 // lipid particle // inferred fr…	0000166 // nucleotide binding // inferred from electronic annotation /// 0005515 // protein binding // inferred from electronic annotation /// 0005524 // ATP binding // inferred from electronic annotation /// 0051082 // unfolded protein binding // inferred from sequence or structural similarity /// 0051082 // unfolded protein binding // inferred from electronic annotation
Group 2 vs 1	1625436_at	Uro	FBgn0003961	4303.31	2085.16	-2.06378	0	302	DEG	Group 3 vs 1	1625436_at	4303.31	1487.15	-2.89365	0	169	DEG	Group 3 vs 2	1625436_at	2085.16	1487.15	-1.40211	0	514	DEG<1.5/-1.60	1625436_at	Uro	Urate oxidase	chr2L:7780084-7781434 (+) // 100.0 //	0006144 // purine base metabolic process // inferred from electronic annotation /// 0019428 // allantoin biosynthetic process // traceable author statement /// 0055114 // oxidation reduction // inferred from electronic annotation	0005777 // peroxisome // non-traceable author statement /// 0005777 // peroxisome // inferred from electronic annotation	0004846 // urate oxidase activity // inferred from sequence or structural similarity /// 0004846 // urate oxidase activity // non-traceable author statement /// 0004846 // urate oxidase activity // inferred from electronic annotation /// 0005515 // protein binding // inferred from physical interaction /// 0016491 // oxidoreductase activity // inferred from electronic annotation
Group 2 vs 1	1633862_at	CG12934	FBgn0033541	4725.95	9737.45	2.06042	0	303	DEG	Group 3 vs 1	1633862_at	4725.95	6051.95	1.28058	0	598	DEG_FC<1.5/-1.194	Group 3 vs 2	1633862_at	9737.45	6051.95	-1.60898	0	391	DEG	1633862_at	CG12934	---	chr2R:6536416-6537250 (+) // 100.0 //	---	---	---
Group 2 vs 1	1637165_at	Cchl	FBgn0038925	815.305	1677.64	2.05769	0	304	DEG	Group 3 vs 1	1637165_at	815.305	1021.46	1.25285	0.0117431	1762	DEG_FC<1.5/-1.1557	Group 3 vs 2	1637165_at	1677.64	1021.46	-1.6424	0	373	DEG	1637165_at	Cchl	CG6022	chr3R:17851686-17853198 (-) // 100.0 //	0018063 // cytochrome c-heme linkage // inferred from sequence or structural similarity	0005739 // mitochondrion // inferred from electronic annotation /// 0005743 // mitochondrial inner membrane // inferred from sequence or structural similarity	0004408 // holocytochrome-c synthase activity // inferred from sequence or structural similarity /// 0004408 // holocytochrome-c synthase activity // inferred from electronic annotation /// 0005515 // protein binding // inferred from physical interaction /// 0016829 // lyase activity // inferred from electronic annotation
Group 2 vs 1	1638991_at	CG5506 /// DsimCG5506	FBgn0036766	7933.88	3858.69	-2.05611	0	305	DEG	Group 3 vs 1	1638991_at	7933.88	2315.09	-3.42702	0	144	DEG	Group 3 vs 2	1638991_at	3858.69	2315.09	-1.66675	0	358	DEG	1638991_at	CG5506 /// DsimCG5506	--- /// ---	chr3L:17876748-17877460 (-) // 100.0 //	---	---	---
Group 2 vs 1	1632114_at	Cyp12a4	FBgn0038681	2483.15	1210.69	-2.05102	0	306	DEG	Group 3 vs 1	1632114_at	2483.15	1912.79	-1.29819	0	576	DEG_FC<1.5/-1.172	Group 3 vs 2	1632114_at	1210.69	1912.79	1.57991	0	406	DEG	1632114_at	Cyp12a4	Cyp12a4	chr3R:14960880-14962858 (+) // 99.76 //	0017085 // response to insecticide // inferred from mutant phenotype /// 0055114 // oxidation reduction // inferred from electronic annotation	0005739 // mitochondrion // inferred from sequence or structural similarity /// 0005739 // mitochondrion // non-traceable author statement /// 0005739 // mitochondrion // inferred from electronic annotation /// 0016020 // membrane // inferred from electronic annotation /// 0031966 // mitochondrial membrane // inferred from electronic annotation	0004497 // monooxygenase activity // inferred from electronic annotation /// 0005506 // iron ion binding // inferred from electronic annotation /// 0005515 // protein binding // inferred from physical interaction /// 0009055 // electron carrier activity // inferred from electronic annotation /// 0009055 // electron carrier activity // inferred from sequence or structural similarity /// 0009055 //…
Group 2 vs 1	1630842_s_at	CG32640 /// CG32641	FBgn0052640 /// FBgn0052641	940.857	459.338	-2.04829	0	307	DEG	Group 3 vs 1	1630842_s_at	940.857	531.092	-1.77155	0	313	DEG	Group 3 vs 2	1630842_s_at	459.338	531.092	1.15621	0.0280747		nonDEG	1630842_s_at	CG32640 /// CG32641	--- /// ---	chrX:13078607-13079006 (+) // 100.0 // /// chrX:13072134-13072533 (+) // 100.0 // /// chrUextra:220564-220963 (-) // 100.0 //	0006457 // protein folding // inferred from electronic annotation /// 0009408 // response to heat // inferred from sequence or structural similarity	---	0031072 // heat shock protein binding // inferred from electronic annotation /// 0051082 // unfolded protein binding // inferred from electronic annotation
Group 2 vs 1	1636539_at	Dak1 /// Sld5	FBgn0028833	1854.68	3797.72	2.04763	0	308	DEG	Group 3 vs 1	1636539_at	1854.68	3127.01	1.68601	0	346	DEG	Group 3 vs 2	1636539_at	3797.72	3127.01	-1.21449	0	758	DEG<1.5/-1.304	1636539_at	Dak1 /// Sld5	Dak1 /// Sld5	chr3R:21879958-21881210 (-) // 100.0 //	0006139 // nucleobase, nucleoside, nucleotide and nucleic acid metabolic process // inferred from electronic annotation	---	0004127 // cytidylate kinase activity // inferred from direct assay /// 0004127 // cytidylate kinase activity // inferred from sequence or structural similarity /// 0004127 // cytidylate kinase activity // non-traceable author statement /// 0004127 // cytidylate kinase activity // inferred from electronic annotation /// 0005524 // ATP binding // inferred from electronic annotation /// 0009041 // …
Group 2 vs 1	1635886_s_at	---	---	1609.96	790.047	-2.0378	0	309	DEG	Group 3 vs 1	1635886_s_at	1609.96	779.998	-2.06405	0	257	DEG	Group 3 vs 2	1635886_s_at	790.047	779.998	-1.01288			nonDEG	1635886_s_at	---	---	chr3RHet:845661-853073 (+) // 99.85 // /// chr2L:15446105-15453517 (+) // 99.92 // /// chr2L:1220183-1227592 (+) // 99.84 // /// chr2L:21347604-21355019 (+) // 99.85 // /// chr2L:11713561-11720972 (+) // 99.84 // /// chr2L:20576273-20583684 (+) // 99.8 // /// chr2R:15603414-15610826 (+) // 99.84 // /// chr2R:14375380-14382793 (+) // 99.85 // /// chr3R:13401107-13408516 (+) // 99.84 // /// chr3R:1…	---	---	0004402 // histone acetyltransferase activity // inferred from sequence or structural similarity
Group 2 vs 1	1626785_at	Nap1	FBgn0015268	1702.57	3465.96	2.03572	0	310	DEG	Group 3 vs 1	1626785_at	1702.57	2027.92	1.19109	0.00308711		nonDEG	Group 3 vs 2	1626785_at	3465.96	2027.92	-1.70912	0	339	DEG	1626785_at	Nap1	Nucleosome assembly protein 1	chr2R:19792695-19794837 (-) // 100.0 //	0006334 // nucleosome assembly // inferred from direct assay /// 0006334 // nucleosome assembly // inferred from sequence or structural similarity /// 0006334 // nucleosome assembly // non-traceable author statement /// 0006334 // nucleosome assembly // inferred from electronic annotation /// 0006355 // regulation of transcription, DNA-dependent // inferred from direct assay	0005634 // nucleus // inferred from direct assay /// 0005634 // nucleus // inferred from electronic annotation /// 0005737 // cytoplasm // inferred from direct assay /// 0016590 // ACF complex // inferred from direct assay	0005515 // protein binding // inferred from physical interaction /// 0042393 // histone binding // inferred from direct assay /// 0042393 // histone binding // traceable author statement
Group 2 vs 1	1624205_at	Tom40	FBgn0016041	1504.52	3044.57	2.02362	0	311	DEG	Group 3 vs 1	1624205_at	1504.52	1791.74	1.19091	0.0139952		nonDEG	Group 3 vs 2	1624205_at	3044.57	1791.74	-1.69922	0	342	DEG	1624205_at	Tom40	Translocase of outer membrane 40	chrX:7631416-7633618 (+) // 99.76 //	0006626 // protein targeting to mitochondrion // inferred from sequence or structural similarity /// 0006810 // transport // inferred from electronic annotation /// 0006811 // ion transport // inferred from electronic annotation /// 0006820 // anion transport // inferred from electronic annotation /// 0015031 // protein transport // inferred from electronic annotation	0005739 // mitochondrion // inferred from electronic annotation /// 0005741 // mitochondrial outer membrane // inferred from electronic annotation /// 0005742 // mitochondrial outer membrane translocase complex // inferred from sequence or structural similarity /// 0016020 // membrane // inferred from electronic annotation /// 0016021 // integral to membrane // inferred from electronic annotation…	0008308 // voltage-gated anion channel activity // inferred from electronic annotation /// 0015450 // P-P-bond-hydrolysis-driven protein transmembrane transporter activity // inferred from sequence or structural similarity
Group 2 vs 1	1628494_a_at	Picot	FBgn0024315	1764.33	3561.72	2.01874	0	312	DEG	Group 3 vs 1	1628494_a_at	1764.33	2880.91	1.63287	0	360	DEG	Group 3 vs 2	1628494_a_at	3561.72	2880.91	-1.23632	0.00121891	891	DEG<1.5/-1.803	1628494_a_at	Picot	Picot	chr2R:12542819-12555183 (-) // 100.0 //	0006810 // transport // inferred from electronic annotation /// 0006811 // ion transport // inferred from electronic annotation /// 0006814 // sodium ion transport // inferred from electronic annotation /// 0006817 // phosphate transport // inferred from electronic annotation /// 0006817 // phosphate transport // non-traceable author statement	0016020 // membrane // inferred from electronic annotation /// 0016021 // integral to membrane // inferred from electronic annotation /// 0016021 // integral to membrane // non-traceable author statement	0005215 // transporter activity // inferred from electronic annotation /// 0005315 // inorganic phosphate transmembrane transporter activity // non-traceable author statement /// 0005316 // high affinity inorganic phosphate:sodium symporter activity // inferred from sequence or structural similarity /// 0005316 // high affinity inorganic phosphate:sodium symporter activity // non-traceable author…
Group 2 vs 1	1636762_a_at	scf	FBgn0025682	819.985	1654.26	2.01743	0	313	DEG	Group 3 vs 1	1636762_a_at	819.985	1002.35	1.2224	0.0374312	2106	DEG_FC<1.5/-1.2546	Group 3 vs 2	1636762_a_at	1654.26	1002.35	-1.65037	0	368	DEG	1636762_a_at	scf	supercoiling factor	chr3L:1298617-1300384 (+) // 100.0 //	0006325 // establishment or maintenance of chromatin architecture // inferred from mutant phenotype /// 0009047 // dosage compensation, by hyperactivation of X chromosome // inferred from mutant phenotype	0005700 // polytene chromosome // inferred from direct assay	0003916 // DNA topoisomerase activity // inferred from sequence or structural similarity /// 0003916 // DNA topoisomerase activity // non-traceable author statement /// 0005509 // calcium ion binding // inferred from electronic annotation
Group 2 vs 1	1626534_at	tko	FBgn0003714	983.347	1983.49	2.01708	0	314	DEG	Group 3 vs 1	1626534_at	983.347	1427.87	1.45205	0	436	DEG_FC<1.5/-1.32	Group 3 vs 2	1626534_at	1983.49	1427.87	-1.38913	0.00127612	906	DEG<1.5/-1.235	1626534_at	tko	mitochondrial ribosomal protein S12	chrX:2336339-2338009 (-) // 100.0 //	0006412 // translation // inferred from sequence or structural similarity /// 0006412 // translation // inferred from electronic annotation /// 0007605 // sensory perception of sound // traceable author statement /// 0007610 // behavior // non-traceable author statement /// 0007619 // courtship behavior // traceable author statement /// 0007638 // mechanosensory behavior // inferred from mutant p…	0005622 // intracellular // inferred from electronic annotation /// 0005739 // mitochondrion // inferred from electronic annotation /// 0005761 // mitochondrial ribosome // non-traceable author statement /// 0005763 // mitochondrial small ribosomal subunit // inferred from sequence or structural similarity /// 0005840 // ribosome // inferred from electronic annotation /// 0015935 // small ribosom…	0003735 // structural constituent of ribosome // inferred from sequence or structural similarity /// 0003735 // structural constituent of ribosome // non-traceable author statement /// 0003735 // structural constituent of ribosome // inferred from electronic annotation
Group 2 vs 1	1623903_at	CG18473	FBgn0037683	1175.01	2366.55	2.01406	0	315	DEG	Group 3 vs 1	1623903_at	1175.01	2948.13	2.50903	0	202	DEG	Group 3 vs 2	1623903_at	2366.55	2948.13	1.24575	0	701	DEG<1.5/-1.247	1623903_at	CG18473	---	chr3R:5189031-5190560 (+) // 100.0 //	0009056 // catabolic process // inferred from electronic annotation	---	0004063 // aryldialkylphosphatase activity // inferred from sequence or structural similarity /// 0008270 // zinc ion binding // inferred from electronic annotation /// 0016787 // hydrolase activity // non-traceable author statement /// 0016787 // hydrolase activity // inferred from electronic annotation /// 0016788 // hydrolase activity, acting on ester bonds // inferred from electronic annotati…
Group 2 vs 1	1636046_at	Cda4	FBgn0052499	1597.38	3212.36	2.01102	0	316	DEG	Group 3 vs 1	1636046_at	1597.38	2380.01	1.48995	0	414	DEG_FC<1.5/-1.10	Group 3 vs 2	1636046_at	3212.36	2380.01	-1.34972	0	566	DEG<1.5/-1.112	1636046_at	Cda4	CG32499	chrX:21985469-22034545 (-) // 99.79 //	0005975 // carbohydrate metabolic process // inferred from electronic annotation /// 0006030 // chitin metabolic process // inferred from electronic annotation	0005576 // extracellular region // inferred from electronic annotation	0008061 // chitin binding // inferred from electronic annotation /// 0016810 // hydrolase activity, acting on carbon-nitrogen (but not peptide) bonds // inferred from electronic annotation
Group 2 vs 1	1629469_s_at	CG10960	FBgn0036316	1352.88	673.904	-2.00752	0	317	DEG	Group 3 vs 1	1629469_s_at	1352.88	1174.82	-1.15156	0.0132272		nonDEG	Group 3 vs 2	1629469_s_at	673.904	1174.82	1.74331	0	330	DEG	1629469_s_at	CG10960	---	chr3L:12817981-12836205 (-) // 100.0 //	0006810 // transport // inferred from electronic annotation /// 0055085 // transmembrane transport // inferred from electronic annotation	0016020 // membrane // inferred from electronic annotation /// 0016021 // integral to membrane // inferred from electronic annotation	0005215 // transporter activity // inferred from electronic annotation /// 0005355 // glucose transmembrane transporter activity // inferred from sequence or structural similarity /// 0022891 // substrate-specific transmembrane transporter activity // inferred from electronic annotation
Group 2 vs 1	1639401_at	LvpH	FBgn0002570	1479.21	737.055	-2.00691	0	318	DEG	Group 3 vs 1	1639401_at	1479.21	1568.95	1.06067	0.10555		nonDEG	Group 3 vs 2	1639401_at	737.055	1568.95	2.12868	0	220	DEG	1639401_at	LvpH	maltase	chr2R:4337165-4339404 (-) // 100.0 //	0005975 // carbohydrate metabolic process // inferred from electronic annotation /// 0006006 // glucose metabolic process // non-traceable author statement /// 0008152 // metabolic process // inferred from electronic annotation	---	0003824 // catalytic activity // inferred from electronic annotation /// 0004558 // alpha-glucosidase activity // inferred from sequence or structural similarity /// 0004558 // alpha-glucosidase activity // non-traceable author statement /// 0004558 // alpha-glucosidase activity // inferred from electronic annotation /// 0016787 // hydrolase activity // inferred from electronic annotation /// 001…
Group 2 vs 1	1630302_at	CG8562	FBgn0035779	1773.32	3556.01	2.00529	0	319	DEG	Group 3 vs 1	1630302_at	1773.32	2053.66	1.15809	0.0104429		nonDEG	Group 3 vs 2	1630302_at	3556.01	2053.66	-1.73155	0	332	DEG	1630302_at	CG8562	---	chr3L:7391329-7393012 (+) // 100.0 //	0006508 // proteolysis // inferred from electronic annotation	---	0004180 // carboxypeptidase activity // inferred from electronic annotation /// 0004181 // metallocarboxypeptidase activity // inferred from sequence or structural similarity /// 0005515 // protein binding // inferred from physical interaction /// 0008270 // zinc ion binding // inferred from electronic annotation /// 0016787 // hydrolase activity // inferred from electronic annotation
Group 2 vs 1	1623326_a_at	mge	FBgn0035473	1598.17	3199.02	2.00168	0	320	DEG	Group 3 vs 1	1623326_a_at	1598.17	1924.75	1.20435	0.00520783	1590	DEG_FC<1.5/-1.1118	Group 3 vs 2	1623326_a_at	3199.02	1924.75	-1.66204	0	362	DEG	1623326_a_at	mge	maggie	chr3L:3907856-3909931 (-) // 100.0 //	0006886 // intracellular protein transport // inferred from electronic annotation	0005739 // mitochondrion // inferred from direct assay /// 0005742 // mitochondrial outer membrane translocase complex // inferred from sequence or structural similarity /// 0005742 // mitochondrial outer membrane translocase complex // non-traceable author statement	0015450 // P-P-bond-hydrolysis-driven protein transmembrane transporter activity // inferred from sequence or structural similarity
Group 2 vs 1	1634013_at	mRpL17	FBgn0035122	731.459	1462.93	2.00001	0	321	DEG	Group 3 vs 1	1634013_at	731.459	895.558	1.22434	0.0334722	2078	DEG_FC<1.5/-1.2450	Group 3 vs 2	1634013_at	1462.93	895.558	-1.63354	0	380	DEG	1634013_at	mRpL17	mitochondrial ribosomal protein L17	chr3L:264781-265599 (+) // 100.0 //	0006412 // translation // inferred from sequence or structural similarity /// 0006412 // translation // inferred from electronic annotation	0005622 // intracellular // inferred from electronic annotation /// 0005762 // mitochondrial large ribosomal subunit // inferred from sequence or structural similarity /// 0005840 // ribosome // inferred from electronic annotation /// 0030529 // ribonucleoprotein complex // inferred from electronic annotation	0003735 // structural constituent of ribosome // inferred from sequence or structural similarity /// 0003735 // structural constituent of ribosome // inferred from electronic annotation
Group 2 vs 1	1623813_at	CG33307	FBgn0053307	3257.64	1632.88	-1.99503	0	322	DEG	Group 3 vs 1	1623813_at	3257.64	2123.24	-1.53428	0	396	DEG	Group 3 vs 2	1623813_at	1632.88	2123.24	1.3003	0	636	DEG<1.5/-1.182	1623813_at	CG33307	---	chr2L:13840801-13843742 (-) // 100.0 //	---	---	---
Group 2 vs 1	1627109_at	Hsc70-5	FBgn0001220	2610.18	5200.52	1.9924	0	323	DEG	Group 3 vs 1	1627109_at	2610.18	2815.62	1.07871	0.0317322		nonDEG	Group 3 vs 2	1627109_at	5200.52	2815.62	-1.84703	0	291	DEG	1627109_at	Hsc70-5	Heat shock protein cognate 5	chr2R:10140102-10143697 (-) // 100.0 //	0006457 // protein folding // inferred from sequence or structural similarity /// 0006457 // protein folding // inferred from electronic annotation /// 0006950 // response to stress // inferred from electronic annotation /// 0009408 // response to heat // non-traceable author statement	0005739 // mitochondrion // inferred from sequence or structural similarity /// 0005739 // mitochondrion // non-traceable author statement /// 0005811 // lipid particle // inferred from direct assay	0000166 // nucleotide binding // inferred from electronic annotation /// 0005515 // protein binding // inferred from physical interaction /// 0005524 // ATP binding // inferred from electronic annotation /// 0016887 // ATPase activity // non-traceable author statement /// 0051082 // unfolded protein binding // inferred from sequence or structural similarity /// 0051082 // unfolded protein binding…
Group 2 vs 1	1638020_at	CG10467	FBgn0035679	2343.62	1177.51	-1.99031	0	324	DEG	Group 3 vs 1	1638020_at	2343.62	2074.71	-1.12961	0.0155192		nonDEG	Group 3 vs 2	1638020_at	1177.51	2074.71	1.76194	0	324	DEG	1638020_at	CG10467	---	chr3L:6086303-6087836 (-) // 100.0 //	0005975 // carbohydrate metabolic process // inferred from electronic annotation	---	0003824 // catalytic activity // inferred from electronic annotation /// 0004034 // aldose 1-epimerase activity // inferred from sequence or structural similarity /// 0004034 // aldose 1-epimerase activity // inferred from electronic annotation /// 0016853 // isomerase activity // inferred from electronic annotation /// 0030246 // carbohydrate binding // inferred from electronic annotation
Group 2 vs 1	1640375_at	bonsai	FBgn0026261	921.92	1831.71	1.98684	0	325	DEG	Group 3 vs 1	1640375_at	921.92	1266.73	1.37402	0.00178244	1441	DEG_FC<1.5/-1.650	Group 3 vs 2	1640375_at	1831.71	1266.73	-1.44601	0.00117538	881	DEG<1.5/-1.94	1640375_at	bonsai	bonsai	chr2R:18525276-18526373 (+) // 100.0 //	0006412 // translation // inferred from sequence or structural similarity /// 0006412 // translation // inferred from electronic annotation /// 0040008 // regulation of growth // inferred from mutant phenotype	0005622 // intracellular // inferred from electronic annotation /// 0005739 // mitochondrion // inferred from direct assay /// 0005739 // mitochondrion // inferred from electronic annotation /// 0005763 // mitochondrial small ribosomal subunit // inferred from sequence or structural similarity /// 0005840 // ribosome // inferred from electronic annotation /// 0030529 // ribonucleoprotein complex …	0003735 // structural constituent of ribosome // inferred from sequence or structural similarity /// 0003735 // structural constituent of ribosome // inferred from electronic annotation
Group 2 vs 1	1638789_at	fau	FBgn0020439	7096.48	3575.04	-1.98501	0	326	DEG	Group 3 vs 1	1638789_at	7096.48	4806.46	-1.47645	0	422	DEG_FC<1.5/-1.18	Group 3 vs 2	1638789_at	3575.04	4806.46	1.34445	0	577	DEG<1.5/-1.123	1638789_at	fau	fau	chr3R:6599253-6603083 (-) // 100.0 //	0006950 // response to stress // inferred from electronic annotation /// 0006979 // response to oxidative stress // inferred from direct assay	---	0005515 // protein binding // inferred from physical interaction
Group 2 vs 1	1628498_at	obst-E	FBgn0031737	1528.56	3031.3	1.98311	0	327	DEG	Group 3 vs 1	1628498_at	1528.56	2205.52	1.44287	0	443	DEG_FC<1.5/-1.39	Group 3 vs 2	1628498_at	3031.3	2205.52	-1.37442	0	541	DEG<1.5/-1.87	1628498_at	obst-E	CG11142	chr2L:5762673-5766141 (-) // 100.0 //	0006030 // chitin metabolic process // inferred from electronic annotation	0005576 // extracellular region // inferred from electronic annotation	0005515 // protein binding // inferred from physical interaction /// 0008061 // chitin binding // inferred from electronic annotation /// 0008061 // chitin binding // inferred from reviewed computational analysis /// 0016490 // structural constituent of peritrophic membrane // inferred from sequence or structural similarity
Group 2 vs 1	1635137_a_at	CG5946	FBgn0036211	2038.31	4035.18	1.97967	0	328	DEG	Group 3 vs 1	1635137_a_at	2038.31	3010.93	1.47717	0	421	DEG_FC<1.5/-1.17	Group 3 vs 2	1635137_a_at	4035.18	3010.93	-1.34018	0	590	DEG<1.5/-1.136	1635137_a_at	CG5946	---	chr3L:11810089-11815357 (-) // 100.0 //	0006470 // protein amino acid dephosphorylation // non-traceable author statement /// 0006911 // phagocytosis, engulfment // inferred from mutant phenotype /// 0055114 // oxidation reduction // inferred from electronic annotation	---	0004128 // cytochrome-b5 reductase activity // inferred from sequence or structural similarity /// 0004128 // cytochrome-b5 reductase activity // inferred from electronic annotation /// 0004721 // phosphoprotein phosphatase activity // inferred from electronic annotation /// 0004722 // protein serine/threonine phosphatase activity // non-traceable author statement /// 0005506 // iron ion binding …
Group 2 vs 1	1634409_at	CG31775 /// CG42586	FBgn0028537	1844.92	3648.34	1.9775	0	329	DEG	Group 3 vs 1	1634409_at	1844.92	2044.39	1.10812	0.0185538		nonDEG	Group 3 vs 2	1634409_at	3648.34	2044.39	-1.78456	0	314	DEG	1634409_at	CG31775 /// CG42586	--- /// ---	chrUextra:222711-223384 (+) // 100.0 // /// chr2L:14737093-14737766 (-) // 100.0 // /// chr2L:14741164-14741837 (-) // 100.0 //	---	---	---
Group 2 vs 1	1639892_at	Sodh-1	FBgn0024289	1178.18	598.055	-1.97002	0	330	DEG	Group 3 vs 1	1639892_at	1178.18	1171.9	-1.00536	0.0835757		nonDEG	Group 3 vs 2	1639892_at	598.055	1171.9	1.95952	0	255	DEG	1639892_at	Sodh-1	Sorbitol dehydrogenase like	chr3R:2878056-2880264 (+) // 100.0 //	0008152 // metabolic process // inferred from electronic annotation /// 0055114 // oxidation reduction // inferred from electronic annotation	---	0003824 // catalytic activity // inferred from electronic annotation /// 0003939 // L-iditol 2-dehydrogenase activity // non-traceable author statement /// 0003939 // L-iditol 2-dehydrogenase activity // inferred from electronic annotation /// 0005488 // binding // inferred from electronic annotation /// 0008270 // zinc ion binding // inferred from electronic annotation /// 0016491 // oxidoreduct…
Group 2 vs 1	1637109_s_at	CG3961	FBgn0036821	946.329	480.676	-1.96875	0	331	DEG	Group 3 vs 1	1637109_s_at	946.329	807.152	-1.17243	0.0176347		nonDEG	Group 3 vs 2	1637109_s_at	480.676	807.152	1.6792	0.000995701	805	DEG	1637109_s_at	CG3961	---	chr3L:18871353-18883582 (-) // 100.0 //	0008152 // metabolic process // inferred from electronic annotation	---	0003824 // catalytic activity // inferred from electronic annotation /// 0004467 // long-chain-fatty-acid-CoA ligase activity // inferred from sequence or structural similarity /// 0004467 // long-chain-fatty-acid-CoA ligase activity // inferred from electronic annotation /// 0016874 // ligase activity // inferred from electronic annotation
Group 2 vs 1	1631225_at	CG8317	FBgn0034140	1041.55	531.901	-1.95816	0	332	DEG	Group 3 vs 1	1631225_at	1041.55	1388.17	1.3328	0.00756628	1660	DEG_FC<1.5/-1.1293	Group 3 vs 2	1631225_at	531.901	1388.17	2.60983	0	158	DEG	1631225_at	CG8317	---	chr2R:12462082-12464087 (-) // 100.0 //	---	---	---
Group 2 vs 1	1641491_at	CG7911	FBgn0039732 /// FBgn0039735	1831.19	3582.28	1.95625	0	333	DEG	Group 3 vs 1	1641491_at	1831.19	2437.96	1.33135	0	546	DEG_FC<1.5/-1.142	Group 3 vs 2	1641491_at	3582.28	2437.96	-1.46937	0	477	DEG<1.5/-1.23	1641491_at	CG7911	---	chr3R:25829433-25830403 (-) // 100.0 //	---	0005634 // nucleus // inferred from electronic annotation	0003676 // nucleic acid binding // inferred from electronic annotation /// 0005515 // protein binding // inferred from physical interaction
Group 2 vs 1	1625458_a_at	msk	FBgn0026252	1479.77	2889.3	1.95253	0	334	DEG	Group 3 vs 1	1625458_a_at	1479.77	1856.59	1.25464	0.00117202	1395	DEG_FC<1.5/-1.505	Group 3 vs 2	1625458_a_at	2889.3	1856.59	-1.55624	0	417	DEG	1625458_a_at	msk	moleskin	chr3L:8109277-8114681 (+) // 100.0 //	0000059 // protein import into nucleus, docking // inferred from electronic annotation /// 0000189 // nuclear translocation of MAPK // inferred from mutant phenotype /// 0006606 // protein import into nucleus // inferred from direct assay /// 0006606 // protein import into nucleus // inferred from sequence or structural similarity /// 0006606 // protein import into nucleus // traceable author sta…	0005634 // nucleus // inferred from direct assay /// 0005634 // nucleus // inferred from electronic annotation /// 0005643 // nuclear pore // inferred from electronic annotation /// 0005643 // nuclear pore // inferred from sequence or structural similarity /// 0005737 // cytoplasm // inferred from direct assay /// 0005737 // cytoplasm // inferred from sequence or structural similarity /// 0005737…	0005488 // binding // inferred from electronic annotation /// 0005515 // protein binding // inferred from physical interaction /// 0008320 // protein transmembrane transporter activity // inferred from sequence or structural similarity /// 0008536 // Ran GTPase binding // inferred from sequence or structural similarity /// 0008565 // protein transporter activity // inferred from electronic annota…
Group 2 vs 1	1639338_at	CG11912 /// DsimCG11912	FBgn0031248	5143.68	2651.37	-1.94	0	335	DEG	Group 3 vs 1	1639338_at	5143.68	3555.15	-1.44683	0	439	DEG_FC<1.5/-1.35	Group 3 vs 2	1639338_at	2651.37	3555.15	1.34087	0	588	DEG<1.5/-1.134	1639338_at	CG11912 /// DsimCG11912	--- /// ---	chr2L:318356-319254 (-) // 100.0 //	0006508 // proteolysis // inferred from electronic annotation /// 0006508 // proteolysis // non-traceable author statement	---	0003824 // catalytic activity // inferred from electronic annotation /// 0004252 // serine-type endopeptidase activity // inferred from electronic annotation /// 0004252 // serine-type endopeptidase activity // non-traceable author statement /// 0008233 // peptidase activity // inferred from electronic annotation /// 0016787 // hydrolase activity // inferred from electronic annotation
Group 2 vs 1	1638201_at	26-29-p	FBgn0028967	2091.54	1078.61	-1.93911	0	336	DEG	Group 3 vs 1	1638201_at	2091.54	1750.94	-1.19452	0.00161429		nonDEG	Group 3 vs 2	1638201_at	1078.61	1750.94	1.62333	0	386	DEG	1638201_at	26-29-p	26-29kD-proteinase	chr3L:13987334-13989678 (+) // 100.0 //	0006508 // proteolysis // inferred from electronic annotation	---	0004197 // cysteine-type endopeptidase activity // inferred from electronic annotation /// 0008233 // peptidase activity // inferred from electronic annotation /// 0008234 // cysteine-type peptidase activity // inferred from electronic annotation /// 0016787 // hydrolase activity // inferred from electronic annotation
Group 2 vs 1	1623601_at	Amyrel	FBgn0020506	1122.93	579.833	-1.93664	0	337	DEG	Group 3 vs 1	1623601_at	1122.93	1117.4	-1.00495	0.19971		nonDEG	Group 3 vs 2	1623601_at	579.833	1117.4	1.9271	0	265	DEG	1623601_at	Amyrel	amyrel	chr2R:12538596-12540204 (-) // 100.0 //	0005975 // carbohydrate metabolic process // inferred from electronic annotation /// 0008152 // metabolic process // inferred from electronic annotation	0005576 // extracellular region // inferred from electronic annotation	0003824 // catalytic activity // inferred from electronic annotation /// 0004556 // alpha-amylase activity // non-traceable author statement /// 0004556 // alpha-amylase activity // inferred from electronic annotation /// 0004574 // oligo-1,6-glucosidase activity // non-traceable author statement /// 0005509 // calcium ion binding // inferred from electronic annotation /// 0016787 // hydrolase ac…
Group 2 vs 1	1632527_at	CG13705	FBgn0035582	4368.39	8450.13	1.93438	0	338	DEG	Group 3 vs 1	1632527_at	4368.39	4754.8	1.08846	0.00105813		nonDEG	Group 3 vs 2	1632527_at	8450.13	4754.8	-1.77718	0	316	DEG	1632527_at	CG13705	---	chr3L:4896857-4898470 (+) // 100.0 //	---	---	0005515 // protein binding // inferred from physical interaction
Group 2 vs 1	1640932_s_at	CG32626	FBgn0052626	889.356	461.667	-1.9264	0	339	DEG	Group 3 vs 1	1640932_s_at	889.356	807.879	-1.10085	0.0733501		nonDEG	Group 3 vs 2	1640932_s_at	461.667	807.879	1.74992	0	326	DEG	1640932_s_at	CG32626	---	chrX:13724781-13739863 (-) // 100.0 //	0009168 // purine ribonucleoside monophosphate biosynthetic process // inferred from electronic annotation	---	0003876 // AMP deaminase activity // inferred from sequence or structural similarity /// 0003876 // AMP deaminase activity // inferred from electronic annotation /// 0005515 // protein binding // inferred from physical interaction /// 0016787 // hydrolase activity // inferred from electronic annotation /// 0019239 // deaminase activity // inferred from electronic annotation
Group 2 vs 1	1631806_at	CG8693 /// DsimCG8693	FBgn0033294	3604.13	1872.47	-1.9248	0	340	DEG	Group 3 vs 1	1631806_at	3604.13	2813.31	-1.2811	0	597	DEG_FC<1.5/-1.193	Group 3 vs 2	1631806_at	1872.47	2813.31	1.50246	0	453	DEG	1631806_at	CG8693 /// DsimCG8693	--- /// ---	chr2R:4346328-4348402 (+) // 100.0 //	0005975 // carbohydrate metabolic process // inferred from electronic annotation /// 0008152 // metabolic process // inferred from electronic annotation	---	0003824 // catalytic activity // inferred from electronic annotation /// 0004558 // alpha-glucosidase activity // inferred from sequence or structural similarity /// 0004558 // alpha-glucosidase activity // inferred from electronic annotation /// 0016787 // hydrolase activity // inferred from electronic annotation /// 0016798 // hydrolase activity, acting on glycosyl bonds // inferred from electr…
Group 2 vs 1	1627373_at	Tsp42Eg	FBgn0033128	812.377	1560.13	1.92045	0	341	DEG	Group 3 vs 1	1627373_at	812.377	1372.69	1.68972	0	344	DEG	Group 3 vs 2	1627373_at	1560.13	1372.69	-1.13655	0.0357996		nonDEG	1627373_at	Tsp42Eg	tetraspanin 42E	chr2R:2916417-2920741 (+) // 100.0 //	---	0016020 // membrane // inferred from electronic annotation /// 0016021 // integral to membrane // inferred from electronic annotation /// 0016021 // integral to membrane // inferred from sequence or structural similarity	---
Group 2 vs 1	1628474_at	CG16712	FBgn0031561	5129.21	2675.87	-1.91684	0	342	DEG	Group 3 vs 1	1628474_at	5129.21	2497.67	-2.0536	0	258	DEG	Group 3 vs 2	1628474_at	2675.87	2497.67	-1.07135	0.063832		nonDEG	1628474_at	CG16712	---	chr2L:3696237-3696661 (-) // 100.0 //	---	---	0004867 // serine-type endopeptidase inhibitor activity // inferred from sequence or structural similarity /// 0004867 // serine-type endopeptidase inhibitor activity // inferred from electronic annotation
Group 2 vs 1	1640303_a_at	pst	FBgn0035770	3705.43	7101.83	1.9166	0	343	DEG	Group 3 vs 1	1640303_a_at	3705.43	5182.23	1.39855	0	476	DEG_FC<1.5/-1.72	Group 3 vs 2	1640303_a_at	7101.83	5182.23	-1.37042	0	547	DEG<1.5/-1.93	1640303_a_at	pst	pastrel	chr3L:7350372-7353363 (-) // 100.0 //	0007611 // learning or memory // inferred from mutant phenotype /// 0008355 // olfactory learning // inferred from mutant phenotype	0005811 // lipid particle // inferred from direct assay /// 0005829 // cytosol // inferred from direct assay	---
Group 2 vs 1	1640242_s_at	---	---	1639.23	3139.99	1.91552	0	344	DEG	Group 3 vs 1	1640242_s_at	1639.23	2253.72	1.37486	0	493	DEG_FC<1.5/-1.89	Group 3 vs 2	1640242_s_at	3139.99	2253.72	-1.39325	0	526	DEG<1.5/-1.72	1640242_s_at	---	---	chr2RHet:680778-692162 (+) // 99.9 // /// chr3LHet:1986912-1992160 (+) // 99.83 // /// chrX:2969721-2974970 (+) // 99.92 // /// chrX:18323581-18328835 (+) // 99.9 // /// chr3R:3920184-3925432 (+) // 99.87 // /// chr2RHet:3269468-3274718 (-) // 99.87 // /// chr3RHet:1342896-1348150 (-) // 99.14 // /// chr3RHet:53084-55674 (-) // 49.27 // /// chr3L:23935643-23940892 (-) // 99.79 // /// chrU:1077228…	---	---	---
Group 2 vs 1	1637889_at	CG5883	FBgn0036225	850.955	1628.54	1.91378	0	345	DEG	Group 3 vs 1	1637889_at	850.955	945.222	1.11078	0.0798007		nonDEG	Group 3 vs 2	1637889_at	1628.54	945.222	-1.72292	0	335	DEG	1637889_at	CG5883	---	chr3L:11936747-11937946 (-) // 100.0 //	0006030 // chitin metabolic process // inferred from electronic annotation	0005576 // extracellular region // inferred from electronic annotation	0008061 // chitin binding // inferred from electronic annotation /// 0016490 // structural constituent of peritrophic membrane // inferred from sequence or structural similarity
Group 2 vs 1	1627638_s_at	T-cp1	FBgn0003676	1005.08	1920.18	1.91047	0	346	DEG	Group 3 vs 1	1627638_s_at	1005.08	1452.67	1.44532	0	441	DEG_FC<1.5/-1.37	Group 3 vs 2	1627638_s_at	1920.18	1452.67	-1.32183	0.00122849	893	DEG<1.5/-1.449	1627638_s_at	T-cp1	Tcp1-like	chr3R:18314806-18317153 (-) // 100.0 //	0006457 // protein folding // inferred from sequence or structural similarity /// 0006457 // protein folding // non-traceable author statement /// 0006457 // protein folding // inferred from electronic annotation /// 0006911 // phagocytosis, engulfment // inferred from mutant phenotype /// 0007052 // mitotic spindle organization and biogenesis // inferred from mutant phenotype /// 0044267 // cell…	0005737 // cytoplasm // inferred from electronic annotation /// 0005753 // mitochondrial proton-transporting ATP synthase complex // non-traceable author statement /// 0005832 // chaperonin-containing T-complex // inferred from sequence or structural similarity	0000166 // nucleotide binding // inferred from electronic annotation /// 0005515 // protein binding // inferred from electronic annotation /// 0005524 // ATP binding // inferred from electronic annotation /// 0005524 // ATP binding // non-traceable author statement /// 0008553 // hydrogen-exporting ATPase activity, phosphorylative mechanism // non-traceable author statement /// 0016787 // hydrola…
Group 2 vs 1	1633834_at	CG9701	FBgn0036659	1815.91	952.848	-1.90577	0	347	DEG	Group 3 vs 1	1633834_at	1815.91	1427.48	-1.27211	0	610	DEG_FC<1.5/-1.206	Group 3 vs 2	1633834_at	952.848	1427.48	1.49812	0	459	DEG<1.5/-1.5	1633834_at	CG9701	---	chr3L:16726673-16732471 (+) // 100.0 //	0005975 // carbohydrate metabolic process // inferred from electronic annotation /// 0008152 // metabolic process // inferred from electronic annotation	---	0003824 // catalytic activity // inferred from electronic annotation /// 0004553 // hydrolase activity, hydrolyzing O-glycosyl compounds // inferred from electronic annotation /// 0016787 // hydrolase activity // inferred from electronic annotation /// 0016798 // hydrolase activity, acting on glycosyl bonds // inferred from electronic annotation /// 0043169 // cation binding // inferred from elec…
Group 2 vs 1	1631801_at	CG15044	FBgn0030928	1229.3	2335.62	1.89996	0	348	DEG	Group 3 vs 1	1631801_at	1229.3	1849.1	1.50419	0	407	DEG	Group 3 vs 2	1631801_at	2335.62	1849.1	-1.26311	0.00543065	1300	DEG<1.5/-1.672	1631801_at	CG15044	---	chrX:18385214-18386029 (-) // 100.0 //	---	---	---
Group 2 vs 1	1630150_s_at	Cg25C	FBgn0000299	3676.33	6973.92	1.89698	0	349	DEG	Group 3 vs 1	1630150_s_at	3676.33	5087.58	1.38388	0	486	DEG_FC<1.5/-1.82	Group 3 vs 2	1630150_s_at	6973.92	5087.58	-1.37077	0	546	DEG<1.5/-1.92	1630150_s_at	Cg25C	type IV collagen, alpha-chain	chr2L:5030136-5037114 (+) // 99.62 //	0006817 // phosphate transport // inferred from electronic annotation /// 0007391 // dorsal closure // traceable author statement	0005576 // extracellular region // inferred from electronic annotation /// 0005578 // proteinaceous extracellular matrix // inferred from electronic annotation /// 0005581 // collagen // inferred from electronic annotation /// 0005587 // collagen type IV // non-traceable author statement /// 0005587 // collagen type IV // traceable author statement /// 0005604 // basement membrane // non-traceabl…	0005198 // structural molecule activity // inferred from electronic annotation /// 0005201 // extracellular matrix structural constituent // inferred from electronic annotation /// 0005488 // binding // inferred from electronic annotation
Group 2 vs 1	1633459_a_at	fau	FBgn0020439	5714.52	3024.82	-1.88921	0	350	DEG	Group 3 vs 1	1633459_a_at	5714.52	4143.67	-1.37909	0	489	DEG_FC<1.5/-1.85	Group 3 vs 2	1633459_a_at	3024.82	4143.67	1.36989	0	548	DEG<1.5/-1.94	1633459_a_at	fau	fau	chr3R:6599253-6603083 (-) // 100.0 //	0006950 // response to stress // inferred from electronic annotation /// 0006979 // response to oxidative stress // inferred from direct assay	---	0005515 // protein binding // inferred from physical interaction
Group 2 vs 1	1625476_a_at	CG1674	FBgn0039897	1512.81	801.208	-1.88816	0	351	DEG	Group 3 vs 1	1625476_a_at	1512.81	1022.61	-1.47936	0	418	DEG_FC<1.5/-1.14	Group 3 vs 2	1625476_a_at	801.208	1022.61	1.27634	0.00179426	952	DEG<1.5/-1.605	1625476_a_at	CG1674	---	chr4:252108-265205 (+) // 100.0 //	---	---	0005515 // protein binding // inferred from physical interaction
Group 2 vs 1	1629875_a_at	Cyp4d1	FBgn0005670	4091.25	2166.89	-1.88807	0	352	DEG	Group 3 vs 1	1629875_a_at	4091.25	2911.38	-1.40526	0	469	DEG_FC<1.5/-1.65	Group 3 vs 2	1629875_a_at	2166.89	2911.38	1.34357	0	579	DEG<1.5/-1.125	1629875_a_at	Cyp4d1	Cytochrome P450 4D1	chrX:2053174-2056160 (-) // 100.0 //	0055114 // oxidation reduction // inferred from electronic annotation	0005783 // endoplasmic reticulum // inferred from electronic annotation /// 0005789 // endoplasmic reticulum membrane // inferred from electronic annotation /// 0005792 // microsome // non-traceable author statement /// 0005792 // microsome // inferred from electronic annotation /// 0005811 // lipid particle // inferred from direct assay /// 0016020 // membrane // non-traceable author statement /…	0004497 // monooxygenase activity // inferred from electronic annotation /// 0005506 // iron ion binding // inferred from electronic annotation /// 0009055 // electron carrier activity // inferred from electronic annotation /// 0009055 // electron carrier activity // inferred from sequence or structural similarity /// 0009055 // electron carrier activity // non-traceable author statement /// 0016…
Group 2 vs 1	1637257_at	CG9009 /// DsecCG9009	FBgn0027601	1879.89	998.299	-1.88309	0	353	DEG	Group 3 vs 1	1637257_at	1879.89	1570.43	-1.19705	0.00582399		nonDEG	Group 3 vs 2	1637257_at	998.299	1570.43	1.57311	0	409	DEG	1637257_at	CG9009 /// DsecCG9009	long chain fatty acid CoA ligase /// ---	chrX:14828066-14844771 (-) // 100.0 //	0008152 // metabolic process // inferred from electronic annotation	---	0003824 // catalytic activity // inferred from electronic annotation /// 0004467 // long-chain-fatty-acid-CoA ligase activity // inferred from sequence or structural similarity /// 0004467 // long-chain-fatty-acid-CoA ligase activity // inferred from electronic annotation /// 0016874 // ligase activity // inferred from electronic annotation
Group 2 vs 1	1624793_at	GstD7	FBgn0010043	2362.53	4442.62	1.88045	0	354	DEG	Group 3 vs 1	1624793_at	2362.53	2815.47	1.19172	0.00243126		nonDEG	Group 3 vs 2	1624793_at	4442.62	2815.47	-1.57793	0	407	DEG	1624793_at	GstD7	Glutathione S transferase D7	chr3R:8204267-8204942 (+) // 100.0 //	---	---	0004364 // glutathione transferase activity // inferred from direct assay /// 0004364 // glutathione transferase activity // inferred from sequence or structural similarity /// 0004364 // glutathione transferase activity // non-traceable author statement /// 0004364 // glutathione transferase activity // inferred from electronic annotation /// 0016740 // transferase activity // inferred from elec…
Group 2 vs 1	1635959_at	CG13461	FBgn0036468	1280.69	683.258	-1.87438	0	355	DEG	Group 3 vs 1	1635959_at	1280.69	673.79	-1.90072	0	282	DEG	Group 3 vs 2	1635959_at	683.258	673.79	-1.01405	0.140201		nonDEG	1635959_at	CG13461	---	chr3L:15045161-15045575 (-) // 100.0 //	---	---	---
Group 2 vs 1	1634636_at	CG6426	FBgn0034162	1529.28	816.67	-1.87258	0	356	DEG	Group 3 vs 1	1634636_at	1529.28	1382.49	-1.10618	0.0609609		nonDEG	Group 3 vs 2	1634636_at	816.67	1382.49	1.69284	0	343	DEG	1634636_at	CG6426	---	chr2R:12756896-12759359 (+) // 100.0 //	---	---	0005509 // calcium ion binding // inferred from electronic annotation
Group 2 vs 1	1629520_at	CG8997 /// DsimCG8997	FBgn0028920	10206	5450.57	-1.87247	0	357	DEG	Group 3 vs 1	1629520_at	10206	8869.16	-1.15073	0		nonDEG	Group 3 vs 2	1629520_at	5450.57	8869.16	1.6272	0	384	DEG	1629520_at	CG8997 /// DsimCG8997	--- /// ---	chr2L:13844415-13845305 (-) // 100.0 //	---	---	0005515 // protein binding // inferred from physical interaction
Group 2 vs 1	1626002_at	Roe1	FBgn0014877	895.062	1670.93	1.86683	0	358	DEG	Group 3 vs 1	1626002_at	895.062	885.184	-1.01116			nonDEG	Group 3 vs 2	1626002_at	1670.93	885.184	-1.88766	0	281	DEG	1626002_at	Roe1	Roe1	chr2R:9441586-9443114 (+) // 100.0 //	0006457 // protein folding // inferred from sequence or structural similarity /// 0006457 // protein folding // non-traceable author statement /// 0006457 // protein folding // inferred from electronic annotation /// 0006626 // protein targeting to mitochondrion // inferred from sequence or structural similarity /// 0006626 // protein targeting to mitochondrion // non-traceable author statement	0005739 // mitochondrion // inferred from sequence or structural similarity /// 0005739 // mitochondrion // non-traceable author statement /// 0005739 // mitochondrion // inferred from electronic annotation /// 0005759 // mitochondrial matrix // inferred from sequence or structural similarity /// 0005759 // mitochondrial matrix // non-traceable author statement /// 0005759 // mitochondrial matrix…	0000774 // adenyl-nucleotide exchange factor activity // inferred from electronic annotation /// 0005515 // protein binding // inferred from electronic annotation /// 0042803 // protein homodimerization activity // inferred from electronic annotation /// 0051082 // unfolded protein binding // inferred from sequence or structural similarity /// 0051087 // chaperone binding // inferred from electro…
Group 2 vs 1	1638335_at	CG18493	FBgn0038701	3504.11	1883.26	-1.86066	0	359	DEG	Group 3 vs 1	1638335_at	3504.11	966.182	-3.62676	0	135	DEG	Group 3 vs 2	1638335_at	1883.26	966.182	-1.94918	0	262	DEG	1638335_at	CG18493	---	chr3R:15215993-15217854 (+) // 100.0 //	0006508 // proteolysis // inferred from electronic annotation	---	0008236 // serine-type peptidase activity // inferred from electronic annotation
Group 2 vs 1	1623732_at	Npc2e	FBgn0051410	8540.03	4626.2	-1.84601	0	360	DEG	Group 3 vs 1	1623732_at	8540.03	4277.71	-1.9964	0	270	DEG	Group 3 vs 2	1623732_at	4626.2	4277.71	-1.08147	0.0153045		nonDEG	1623732_at	Npc2e	CG31410	chr3R:5879119-5880005 (+) // 100.0 //	---	---	---
Group 2 vs 1	1628473_at	ng2	FBgn0010294	1463.76	2692.92	1.83974	0	361	DEG	Group 3 vs 1	1628473_at	1463.76	1792.44	1.22455	0.00621266	1625	DEG_FC<1.5/-1.1205	Group 3 vs 2	1628473_at	2692.92	1792.44	-1.50238	0	454	DEG	1628473_at	ng2	new glue 2	chrX:3134057-3134604 (-) // 100.0 //	0007594 // puparial adhesion // non-traceable author statement	0005576 // extracellular region // non-traceable author statement /// 0005576 // extracellular region // inferred from electronic annotation	0005198 // structural molecule activity // non-traceable author statement /// 0005515 // protein binding // inferred from physical interaction
Group 2 vs 1	1624389_at	CG7526	FBgn0035798	1087.62	591.395	-1.83907	0	362	DEG	Group 3 vs 1	1624389_at	1087.62	669.176	-1.62531	0	364	DEG	Group 3 vs 2	1624389_at	591.395	669.176	1.13152	0.0696475		nonDEG	1624389_at	CG7526	---	chr3L:7557434-7562594 (+) // 100.0 //	0007596 // blood coagulation // inferred from electronic annotation	0016020 // membrane // inferred from electronic annotation	0004888 // transmembrane receptor activity // inferred from electronic annotation /// 0005509 // calcium ion binding // inferred from electronic annotation
Group 2 vs 1	1635011_at	Tom20	FBgn0036928	1788.42	3288.34	1.83869	0	363	DEG	Group 3 vs 1	1635011_at	1788.42	2158.39	1.20687	0.00111944	1386	DEG_FC<1.5/-1.522	Group 3 vs 2	1635011_at	3288.34	2158.39	-1.52351	0	434	DEG	1635011_at	Tom20	Translocase of outer membrane 20	chr3L:19994188-19995411 (+) // 100.0 //	0006605 // protein targeting // inferred from electronic annotation /// 0006626 // protein targeting to mitochondrion // inferred from sequence or structural similarity /// 0006886 // intracellular protein transport // inferred from electronic annotation	0005739 // mitochondrion // inferred from direct assay /// 0005742 // mitochondrial outer membrane translocase complex // inferred from sequence or structural similarity /// 0005742 // mitochondrial outer membrane translocase complex // inferred from electronic annotation	0015450 // P-P-bond-hydrolysis-driven protein transmembrane transporter activity // inferred from sequence or structural similarity
Group 2 vs 1	1639584_at	Cyp4ad1	FBgn0033292	1345.1	732.367	-1.83664	0	364	DEG	Group 3 vs 1	1639584_at	1345.1	529.145	-2.54202	0	201	DEG	Group 3 vs 2	1639584_at	732.367	529.145	-1.38406	0.0101366	1574	DEG<1.5/-1.247	1639584_at	Cyp4ad1	CYP4-related	chr2R:4326897-4330284 (-) // 100.0 //	0055114 // oxidation reduction // inferred from electronic annotation	0005783 // endoplasmic reticulum // inferred from electronic annotation /// 0005789 // endoplasmic reticulum membrane // inferred from electronic annotation /// 0005792 // microsome // non-traceable author statement /// 0005792 // microsome // inferred from electronic annotation /// 0016020 // membrane // non-traceable author statement /// 0016020 // membrane // inferred from electronic annotation	0004497 // monooxygenase activity // inferred from electronic annotation /// 0005506 // iron ion binding // inferred from electronic annotation /// 0009055 // electron carrier activity // inferred from electronic annotation /// 0009055 // electron carrier activity // inferred from sequence or structural similarity /// 0009055 // electron carrier activity // non-traceable author statement /// 0016…
Group 2 vs 1	1633283_at	RpL24-like	FBgn0037899	1057.12	1940.94	1.83606	0	365	DEG	Group 3 vs 1	1633283_at	1057.12	1461.39	1.38242	0.00100655	1367	DEG_FC<1.5/-1.469	Group 3 vs 2	1633283_at	1940.94	1461.39	-1.32815	0.00205353	977	DEG<1.5/-1.423	1633283_at	RpL24-like	Ribosomal protein L24-like	chr3R:7256461-7257397 (-) // 100.0 //	0006412 // translation // inferred from sequence or structural similarity /// 0006412 // translation // inferred from electronic annotation /// 0042254 // ribosome biogenesis // inferred from sequence or structural similarity /// 0042254 // ribosome biogenesis // inferred from electronic annotation	0005622 // intracellular // inferred from electronic annotation /// 0005634 // nucleus // inferred from electronic annotation /// 0005840 // ribosome // inferred from electronic annotation /// 0022625 // cytosolic large ribosomal subunit // inferred from sequence or structural similarity	0003735 // structural constituent of ribosome // inferred from sequence or structural similarity /// 0003735 // structural constituent of ribosome // inferred from electronic annotation /// 0005515 // protein binding // inferred from physical interaction
Group 2 vs 1	1638171_s_at	CG1753	FBgn0031148	997.366	1829.76	1.83459	0	366	DEG	Group 3 vs 1	1638171_s_at	997.366	1275.06	1.27843	0.0142936	1811	DEG_FC<1.5/-1.1689	Group 3 vs 2	1638171_s_at	1829.76	1275.06	-1.43504	0.00128928	910	DEG<1.5/-1.130	1638171_s_at	CG1753	---	chrX:20916164-20920127 (+) // 100.0 //	0006535 // cysteine biosynthetic process from serine // inferred from electronic annotation /// 0008152 // metabolic process // inferred from electronic annotation /// 0019343 // cysteine biosynthetic process via cystathionine // inferred from electronic annotation	0005737 // cytoplasm // inferred from electronic annotation	0003824 // catalytic activity // inferred from electronic annotation /// 0004122 // cystathionine beta-synthase activity // inferred from sequence or structural similarity /// 0004122 // cystathionine beta-synthase activity // inferred from electronic annotation /// 0005515 // protein binding // inferred from physical interaction /// 0016829 // lyase activity // inferred from electronic annotatio…
Group 2 vs 1	1630692_at	CG31789	FBgn0051789	11177.1	6096.94	-1.83323	0	367	DEG	Group 3 vs 1	1630692_at	11177.1	2462.12	-4.53962	0	103	DEG	Group 3 vs 2	1630692_at	6096.94	2462.12	-2.4763	0	166	DEG	1630692_at	CG31789	---	chr2L:18605941-18606523 (+) // 100.0 //	---	---	---
Group 2 vs 1	1634742_at	Sodh-2	FBgn0022359	1362.49	743.328	-1.83296	0	368	DEG	Group 3 vs 1	1634742_at	1362.49	1595.46	1.17099	0.015544		nonDEG	Group 3 vs 2	1634742_at	743.328	1595.46	2.14637	0	215	DEG	1634742_at	Sodh-2	Sorbitol dehydrogenase-2	chr3R:6702105-6703988 (+) // 100.0 //	0008152 // metabolic process // inferred from electronic annotation /// 0055114 // oxidation reduction // inferred from electronic annotation	---	0003824 // catalytic activity // inferred from electronic annotation /// 0003939 // L-iditol 2-dehydrogenase activity // inferred from sequence or structural similarity /// 0003939 // L-iditol 2-dehydrogenase activity // traceable author statement /// 0003939 // L-iditol 2-dehydrogenase activity // inferred from electronic annotation /// 0005488 // binding // inferred from electronic annotation /…
Group 2 vs 1	1628428_at	Fpps	FBgn0025373	1425.22	778.329	-1.83113	0	369	DEG	Group 3 vs 1	1628428_at	1425.22	1461.44	1.02542			nonDEG	Group 3 vs 2	1628428_at	778.329	1461.44	1.87766	0	284	DEG	1628428_at	Fpps	Farnesyl diphosphate synthase	chr2R:7193006-7195070 (-) // 100.0 //	0008299 // isoprenoid biosynthetic process // inferred from electronic annotation /// 0008354 // germ cell migration // inferred from mutant phenotype /// 0045337 // farnesyl diphosphate biosynthetic process // inferred by curator	---	0004161 // dimethylallyltranstransferase activity // non-traceable author statement /// 0004161 // dimethylallyltranstransferase activity // inferred from electronic annotation /// 0004337 // geranyltranstransferase activity // inferred from sequence or structural similarity /// 0004337 // geranyltranstransferase activity // non-traceable author statement /// 0008415 // acyltransferase activity /…
Group 2 vs 1	1640488_a_at	CG9510 /// CG9515	FBgn0032076 /// FBgn0032077	2733.33	1495.89	-1.82722	0	370	DEG	Group 3 vs 1	1640488_a_at	2733.33	2276.25	-1.2008	0	692	DEG_FC<1.5/-1.288	Group 3 vs 2	1640488_a_at	1495.89	2276.25	1.52167	0	436	DEG	1640488_a_at	CG9510 /// CG9515	--- /// ---	chr2L:8939779-8943264 (-) // 100.0 //	0042450 // arginine biosynthetic process via ornithine // inferred from electronic annotation	---	0003824 // catalytic activity // inferred from electronic annotation /// 0004056 // argininosuccinate lyase activity // inferred from sequence or structural similarity /// 0004056 // argininosuccinate lyase activity // inferred from electronic annotation /// 0005515 // protein binding // inferred from physical interaction /// 0016829 // lyase activity // inferred from electronic annotation
Group 2 vs 1	1640107_at	obst-A	FBgn0031097	3252.48	5927.55	1.82247	0	371	DEG	Group 3 vs 1	1640107_at	3252.48	4497.66	1.38284	0	487	DEG_FC<1.5/-1.83	Group 3 vs 2	1640107_at	5927.55	4497.66	-1.31792	0	613	DEG<1.5/-1.159	1640107_at	obst-A	CG17052	chrX:20110933-20114254 (+) // 100.0 //	0006030 // chitin metabolic process // inferred from electronic annotation	0005576 // extracellular region // inferred from electronic annotation	0008061 // chitin binding // inferred from electronic annotation /// 0008061 // chitin binding // inferred from reviewed computational analysis /// 0016490 // structural constituent of peritrophic membrane // inferred from sequence or structural similarity
Group 2 vs 1	1623226_at	CG10154	FBgn0036361	1502.62	2738.38	1.8224	0	372	DEG	Group 3 vs 1	1623226_at	1502.62	511.01	-2.9405	0	168	DEG	Group 3 vs 2	1623226_at	2738.38	511.01	-5.35877	0	65	DEG	1623226_at	CG10154	---	chr3L:13428922-13430233 (-) // 100.0 //	0006030 // chitin metabolic process // inferred from electronic annotation /// 0007155 // cell adhesion // inferred from electronic annotation	0005576 // extracellular region // inferred from electronic annotation	0005515 // protein binding // inferred from physical interaction /// 0005540 // hyaluronic acid binding // inferred from electronic annotation /// 0008061 // chitin binding // inferred from electronic annotation /// 0016490 // structural constituent of peritrophic membrane // inferred from sequence or structural similarity
Group 2 vs 1	1634551_at	CG6188	FBgn0038074	5462.35	2997.56	-1.82227	0	373	DEG	Group 3 vs 1	1634551_at	5462.35	4875.43	-1.12038	0.00494142		nonDEG	Group 3 vs 2	1634551_at	2997.56	4875.43	1.62647	0	385	DEG	1634551_at	CG6188	---	chr3R:8500330-8501798 (+) // 100.0 //	---	---	0008168 // methyltransferase activity // inferred from electronic annotation /// 0016740 // transferase activity // inferred from electronic annotation /// 0017174 // glycine N-methyltransferase activity // inferred from sequence or structural similarity /// 0017174 // glycine N-methyltransferase activity // inferred from electronic annotation
Group 2 vs 1	1635070_at	CG9953	FBgn0035726	1006.98	552.997	-1.82095	0	374	DEG	Group 3 vs 1	1635070_at	1006.98	836.317	-1.20406	0.012145	1769	DEG_FC<1.5/-1.1387	Group 3 vs 2	1635070_at	552.997	836.317	1.51234	0	443	DEG	1635070_at	CG9953	---	chr3L:6962710-6964766 (+) // 100.0 //	0006508 // proteolysis // inferred from electronic annotation	---	0004180 // carboxypeptidase activity // inferred from electronic annotation /// 0008236 // serine-type peptidase activity // inferred from electronic annotation /// 0016787 // hydrolase activity // inferred from electronic annotation
Group 2 vs 1	1635494_at	proPO-A1	FBgn0000165	3005.87	1651.51	-1.82007	0	375	DEG	Group 3 vs 1	1635494_at	3005.87	2613.53	-1.15012	0.0196575		nonDEG	Group 3 vs 2	1635494_at	1651.51	2613.53	1.5825	0	404	DEG	1635494_at	proPO-A1	Monophenol oxidase	chr2R:13774717-13777477 (-) // 100.0 //	0006810 // transport // inferred from electronic annotation /// 0006952 // defense response // non-traceable author statement /// 0008152 // metabolic process // inferred from electronic annotation /// 0009608 // response to symbiont // inferred from mutant phenotype /// 0009611 // response to wounding // inferred from mutant phenotype /// 0035006 // melanization defense response // inferred from…	---	0004503 // monophenol monooxygenase activity // inferred from sequence or structural similarity /// 0004503 // monophenol monooxygenase activity // non-traceable author statement /// 0004503 // monophenol monooxygenase activity // traceable author statement /// 0004503 // monophenol monooxygenase activity // inferred from electronic annotation /// 0005344 // oxygen transporter activity // inferre…
Group 2 vs 1	1625583_at	CG16926	FBgn0040732	1470.29	808.08	-1.81949	0	376	DEG	Group 3 vs 1	1625583_at	1470.29	1585.23	1.07817	0.055845		nonDEG	Group 3 vs 2	1625583_at	808.08	1585.23	1.96173	0	254	DEG	1625583_at	CG16926	---	chr2R:15387798-15388801 (-) // 100.0 //	---	---	---
Group 2 vs 1	1625212_at	CG4653	FBgn0030776	1670.63	922.358	-1.81126	0	377	DEG	Group 3 vs 1	1625212_at	1670.63	1289.16	-1.29591	0	579	DEG_FC<1.5/-1.175	Group 3 vs 2	1625212_at	922.358	1289.16	1.39768	0	521	DEG<1.5/-1.67	1625212_at	CG4653	---	chrX:16598120-16599188 (+) // 100.0 //	0006508 // proteolysis // inferred from electronic annotation	---	0003824 // catalytic activity // inferred from electronic annotation /// 0004252 // serine-type endopeptidase activity // inferred from electronic annotation /// 0004252 // serine-type endopeptidase activity // non-traceable author statement
Group 2 vs 1	1640979_at	CG1681	FBgn0030484	1766.44	976.576	-1.80881	0	378	DEG	Group 3 vs 1	1640979_at	1766.44	1927.85	1.09138	0.0488963		nonDEG	Group 3 vs 2	1640979_at	976.576	1927.85	1.9741	0	251	DEG	1640979_at	CG1681	---	chrX:13298788-13303249 (+) // 100.0 //	---	---	0004364 // glutathione transferase activity // inferred from sequence or structural similarity /// 0004364 // glutathione transferase activity // inferred from electronic annotation /// 0005515 // protein binding // inferred from physical interaction /// 0016740 // transferase activity // inferred from electronic annotation
Group 2 vs 1	1624419_a_at	Cct5	FBgn0010621	1815.99	3275.96	1.80395	0	379	DEG	Group 3 vs 1	1624419_a_at	1815.99	2335.71	1.28619	0	589	DEG_FC<1.5/-1.185	Group 3 vs 2	1624419_a_at	3275.96	2335.71	-1.40255	0	513	DEG<1.5/-1.59	1624419_a_at	Cct5	T-complex Chaperonin 5	chr2R:8062280-8065039 (+) // 100.0 //	0006457 // protein folding // inferred from sequence or structural similarity /// 0006457 // protein folding // inferred from electronic annotation /// 0007052 // mitotic spindle organization and biogenesis // inferred from mutant phenotype /// 0044267 // cellular protein metabolic process // inferred from electronic annotation	0005737 // cytoplasm // inferred from electronic annotation /// 0005832 // chaperonin-containing T-complex // inferred from sequence or structural similarity	0000166 // nucleotide binding // inferred from electronic annotation /// 0005515 // protein binding // inferred from electronic annotation /// 0005524 // ATP binding // inferred from electronic annotation /// 0016787 // hydrolase activity // inferred from electronic annotation /// 0042623 // ATPase activity, coupled // inferred from sequence or structural similarity /// 0042624 // ATPase activity…
Group 2 vs 1	1635073_at	CG17108	FBgn0032285	1875.5	1049.63	-1.78681	0	380	DEG	Group 3 vs 1	1635073_at	1875.5	1574.65	-1.19106	0.00636161		nonDEG	Group 3 vs 2	1635073_at	1049.63	1574.65	1.50019	0	458	DEG	1635073_at	CG17108	---	chr2L:10692937-10694103 (-) // 100.0 //	0006810 // transport // inferred from electronic annotation	0016021 // integral to membrane // inferred from electronic annotation	0003989 // acetyl-CoA carboxylase activity // non-traceable author statement /// 0003989 // acetyl-CoA carboxylase activity // inferred from electronic annotation /// 0005215 // transporter activity // inferred from electronic annotation /// 0005515 // protein binding // inferred from physical interaction /// 0016874 // ligase activity // inferred from electronic annotation
Group 2 vs 1	1630063_a_at	eIF-3p66	FBgn0040227	2560.75	4574.68	1.78646	0	381	DEG	Group 3 vs 1	1630063_a_at	2560.75	3941.56	1.53922	0	394	DEG	Group 3 vs 2	1630063_a_at	4574.68	3941.56	-1.16063	0		nonDEG	1630063_a_at	eIF-3p66	Eukaryotic initiation factor 3 p66 subunit	chr3R:19505766-19508049 (+) // 100.0 //	0006412 // translation // non-traceable author statement /// 0006413 // translational initiation // inferred from electronic annotation /// 0006413 // translational initiation // inferred from sequence or structural similarity /// 0006413 // translational initiation // non-traceable author statement	0005829 // cytosol // inferred from sequence or structural similarity /// 0005829 // cytosol // non-traceable author statement /// 0005852 // eukaryotic translation initiation factor 3 complex // inferred from sequence or structural similarity /// 0005852 // eukaryotic translation initiation factor 3 complex // non-traceable author statement	0003743 // translation initiation factor activity // inferred from electronic annotation /// 0003743 // translation initiation factor activity // inferred from sequence or structural similarity /// 0003743 // translation initiation factor activity // non-traceable author statement
Group 2 vs 1	1635125_a_at	CG6206 /// DsimCG6206	FBgn0027611	1647.79	925.771	-1.77991	0	382	DEG	Group 3 vs 1	1635125_a_at	1647.79	1498.6	-1.09955	0.0200064		nonDEG	Group 3 vs 2	1635125_a_at	925.771	1498.6	1.61876	0	387	DEG	1635125_a_at	CG6206 /// DsimCG6206	lysosomal mannosidase /// ---	chr2L:10457655-10462475 (+) // 100.0 //	0005975 // carbohydrate metabolic process // inferred from electronic annotation /// 0006013 // mannose metabolic process // inferred from electronic annotation /// 0008152 // metabolic process // inferred from electronic annotation	0005764 // lysosome // inferred from sequence or structural similarity	0003824 // catalytic activity // inferred from electronic annotation /// 0004559 // alpha-mannosidase activity // inferred from sequence or structural similarity /// 0004559 // alpha-mannosidase activity // inferred from electronic annotation /// 0005515 // protein binding // inferred from physical interaction /// 0015923 // mannosidase activity // inferred from electronic annotation /// 0016787 …
Group 2 vs 1	1628314_a_at	CG6891	FBgn0030955	1296.31	729.76	-1.77636	0	383	DEG	Group 3 vs 1	1628314_a_at	1296.31	1466.75	1.13148	0.0165987		nonDEG	Group 3 vs 2	1628314_a_at	729.76	1466.75	2.00991	0	244	DEG	1628314_a_at	CG6891	---	chrX:18669262-18675378 (+) // 100.0 //	---	0005622 // intracellular // inferred from electronic annotation	0003779 // actin binding // inferred from electronic annotation /// 0005515 // protein binding // inferred from physical interaction
Group 2 vs 1	1630132_at	Tcp-1zeta	FBgn0027329	964.544	1712.82	1.77579	0	384	DEG	Group 3 vs 1	1630132_at	964.544	1197.13	1.24114	0.00572197	1607	DEG_FC<1.5/-1.1157	Group 3 vs 2	1630132_at	1712.82	1197.13	-1.43077	0.0013192	918	DEG<1.5/-1.140	1630132_at	Tcp-1zeta	lethal (1) G0022	chrX:15640658-15643006 (+) // 100.0 //	0006457 // protein folding // inferred from sequence or structural similarity /// 0006457 // protein folding // inferred from electronic annotation /// 0006950 // response to stress // inferred from electronic annotation /// 0006986 // response to unfolded protein // non-traceable author statement /// 0007052 // mitotic spindle organization and biogenesis // inferred from mutant phenotype /// 000…	0005737 // cytoplasm // inferred from electronic annotation /// 0005811 // lipid particle // inferred from direct assay /// 0005832 // chaperonin-containing T-complex // inferred from sequence or structural similarity	0000166 // nucleotide binding // inferred from electronic annotation /// 0005515 // protein binding // inferred from electronic annotation /// 0005524 // ATP binding // inferred from electronic annotation /// 0016787 // hydrolase activity // inferred from electronic annotation /// 0042623 // ATPase activity, coupled // inferred from sequence or structural similarity /// 0042624 // ATPase activity…
Group 2 vs 1	1640527_at	Rlc1	FBgn0014023	1081.77	1917.38	1.77244	0	385	DEG	Group 3 vs 1	1640527_at	1081.77	1360.87	1.258	0.00473172	1566	DEG_FC<1.5/-1.1054	Group 3 vs 2	1640527_at	1917.38	1360.87	-1.40894	0.00127873	907	DEG<1.5/-1.194	1640527_at	Rlc1	Rlc1	chr3R:5340537-5341829 (-) // 100.0 //	0006412 // translation // inferred from electronic annotation	0005761 // mitochondrial ribosome // inferred from electronic annotation /// 0005762 // mitochondrial large ribosomal subunit // inferred from sequence or structural similarity	0003735 // structural constituent of ribosome // inferred from sequence or structural similarity /// 0003735 // structural constituent of ribosome // inferred from electronic annotation
Group 2 vs 1	1631834_at	CG31098	FBgn0051098	983.744	1741.95	1.77074	0	386	DEG	Group 3 vs 1	1631834_at	983.744	1160.24	1.17942	0.0178581		nonDEG	Group 3 vs 2	1631834_at	1741.95	1160.24	-1.50137	0	455	DEG	1631834_at	CG31098	---	chr3R:21117217-21118693 (-) // 100.0 //	---	---	---
Group 2 vs 1	1630161_at	fau	FBgn0020439	2355.59	1333.43	-1.76656	0	387	DEG	Group 3 vs 1	1630161_at	2355.59	1386.38	-1.69909	0	339	DEG	Group 3 vs 2	1630161_at	1333.43	1386.38	1.03971	0.0778698		nonDEG	1630161_at	fau	fau	chr3R:6600265-6603083 (-) // 100.0 //	0006950 // response to stress // inferred from electronic annotation /// 0006979 // response to oxidative stress // inferred from direct assay	---	0005515 // protein binding // inferred from physical interaction
Group 2 vs 1	1637900_at	CG11852	FBgn0039297	1278.61	2257.97	1.76595	0	388	DEG	Group 3 vs 1	1637900_at	1278.61	1212.09	-1.05488	0.0780854		nonDEG	Group 3 vs 2	1637900_at	2257.97	1212.09	-1.86287	0	288	DEG	1637900_at	CG11852	---	chr3R:21063346-21064617 (+) // 100.0 //	---	---	0005515 // protein binding // inferred from physical interaction
Group 2 vs 1	1637491_s_at	CG3835	FBgn0023507	3998.62	2267.72	-1.76328	0	389	DEG	Group 3 vs 1	1637491_s_at	3998.62	2646.22	-1.51107	0	405	DEG	Group 3 vs 2	1637491_s_at	2267.72	2646.22	1.16691	0		nonDEG	1637491_s_at	CG3835	---	chrX:2035520-2038972 (+) // 100.0 //	---	---	0003824 // catalytic activity // inferred from electronic annotation /// 0016491 // oxidoreductase activity // inferred from electronic annotation /// 0050660 // FAD binding // inferred from electronic annotation
Group 2 vs 1	1637971_a_at	CG8129	FBgn0037684	1151.77	654.179	-1.76064	0	390	DEG	Group 3 vs 1	1637971_a_at	1151.77	594.855	-1.93622	0	277	DEG	Group 3 vs 2	1637971_a_at	654.179	594.855	-1.09973	0.171432		nonDEG	1637971_a_at	CG8129	---	chr3R:5191141-5193488 (+) // 100.0 //	0008152 // metabolic process // inferred from electronic annotation	---	0000257 // nitrilase activity // inferred from electronic annotation /// 0003824 // catalytic activity // inferred from electronic annotation /// 0004794 // L-threonine ammonia-lyase activity // inferred from sequence or structural similarity /// 0004794 // L-threonine ammonia-lyase activity // inferred from electronic annotation /// 0005515 // protein binding // inferred from physical interactio…
Group 2 vs 1	1633031_at	CG8299	FBgn0034052	2090.8	1187.71	-1.76036	0	391	DEG	Group 3 vs 1	1633031_at	2090.8	258.45	-8.08975	0	70	DEG	Group 3 vs 2	1633031_at	1187.71	258.45	-4.5955	0	80	DEG	1633031_at	CG8299	---	chr2R:11828205-11828988 (-) // 100.0 //	0006508 // proteolysis // inferred from electronic annotation /// 0006508 // proteolysis // non-traceable author statement	---	0003824 // catalytic activity // inferred from electronic annotation /// 0004252 // serine-type endopeptidase activity // inferred from electronic annotation /// 0008233 // peptidase activity // inferred from electronic annotation /// 0016787 // hydrolase activity // inferred from electronic annotation
Group 2 vs 1	1623329_at	CG14500	FBgn0034318	3006.7	1708.44	-1.75991	0	392	DEG	Group 3 vs 1	1623329_at	3006.7	2132.31	-1.41007	0	466	DEG_FC<1.5/-1.62	Group 3 vs 2	1623329_at	1708.44	2132.31	1.2481	0	696	DEG<1.5/-1.242	1623329_at	CG14500	---	chr2R:14076483-14077159 (+) // 100.0 //	---	---	0005488 // binding // inferred from electronic annotation
Group 2 vs 1	1631446_at	Cht9	FBgn0034582	4162.37	7308.88	1.75594	0	393	DEG	Group 3 vs 1	1631446_at	4162.37	3822.91	-1.0888	0.0104226		nonDEG	Group 3 vs 2	1631446_at	7308.88	3822.91	-1.91186	0	276	DEG	1631446_at	Cht9	CG10531	chr2R:16955496-16956777 (-) // 99.14 //	0005975 // carbohydrate metabolic process // inferred from electronic annotation /// 0006032 // chitin catabolic process // inferred from electronic annotation /// 0008152 // metabolic process // inferred from electronic annotation	---	0003824 // catalytic activity // inferred from electronic annotation /// 0004553 // hydrolase activity, hydrolyzing O-glycosyl compounds // inferred from electronic annotation /// 0004568 // chitinase activity // inferred from sequence or structural similarity /// 0004568 // chitinase activity // inferred from electronic annotation /// 0005515 // protein binding // inferred from physical interact…
Group 2 vs 1	1628935_at	CG10962	FBgn0030073	2066.89	1177.2	-1.75577	0	394	DEG	Group 3 vs 1	1628935_at	2066.89	2622.98	1.26905	0.00101337	1368	DEG_FC<1.5/-1.500	Group 3 vs 2	1628935_at	1177.2	2622.98	2.22815	0	198	DEG	1628935_at	CG10962	---	chrX:8866939-8868276 (-) // 100.0 //	0008152 // metabolic process // inferred from electronic annotation /// 0055114 // oxidation reduction // inferred from electronic annotation	---	0003824 // catalytic activity // inferred from electronic annotation /// 0005488 // binding // inferred from electronic annotation /// 0016491 // oxidoreductase activity // inferred from electronic annotation /// 0016616 // oxidoreductase activity, acting on the CH-OH group of donors, NAD or NADP as acceptor // inferred from sequence or structural similarity
Group 2 vs 1	1625297_at	CG8128	FBgn0030668	1111.73	1951.48	1.75536	0	395	DEG	Group 3 vs 1	1625297_at	1111.73	999.535	-1.11225	0.0714073		nonDEG	Group 3 vs 2	1625297_at	1951.48	999.535	-1.95239	0	260	DEG	1625297_at	CG8128	---	chrX:15591537-15594069 (+) // 99.74 //	---	---	0016787 // hydrolase activity // inferred from electronic annotation
Group 2 vs 1	1640720_a_at	CG14872	FBgn0038346	2987.74	1703.41	-1.75397	0	396	DEG	Group 3 vs 1	1640720_a_at	2987.74	1699.18	-1.75834	0	317	DEG	Group 3 vs 2	1640720_a_at	1703.41	1699.18	-1.00249	0.12231		nonDEG	1640720_a_at	CG14872	---	chr3R:11333780-11335362 (-) // 100.0 //	0006810 // transport // inferred from electronic annotation	---	0005215 // transporter activity // inferred from electronic annotation /// 0005488 // binding // inferred from electronic annotation
Group 2 vs 1	1623769_at	CG7322	FBgn0030968	2138.99	1220.04	-1.75322	0	397	DEG	Group 3 vs 1	1623769_at	2138.99	1957.45	-1.09274	0.0287295		nonDEG	Group 3 vs 2	1623769_at	1220.04	1957.45	1.60442	0	395	DEG	1623769_at	CG7322	---	chrX:18749951-18751484 (-) // 100.0 //	0008152 // metabolic process // inferred from electronic annotation /// 0055114 // oxidation reduction // inferred from electronic annotation	---	0003824 // catalytic activity // inferred from electronic annotation /// 0005488 // binding // inferred from electronic annotation /// 0016491 // oxidoreductase activity // inferred from electronic annotation /// 0016614 // oxidoreductase activity, acting on CH-OH group of donors // inferred from sequence or structural similarity
Group 2 vs 1	1635817_at	CG11131	FBgn0037204	2305.57	4037.47	1.75118	0	398	DEG	Group 3 vs 1	1635817_at	2305.57	1230.08	-1.87433	0	288	DEG	Group 3 vs 2	1635817_at	4037.47	1230.08	-3.28229	0	112	DEG	1635817_at	CG11131	---	chr3L:22892279-22893362 (+) // 99.37 //	---	---	---
Group 2 vs 1	1626246_s_at	vig	FBgn0024183	1298.48	2266.81	1.74574	0	399	DEG	Group 3 vs 1	1626246_s_at	1298.48	1598.9	1.23136	0.00416868	1543	DEG_FC<1.5/-1.1000	Group 3 vs 2	1626246_s_at	2266.81	1598.9	-1.41773	0	503	DEG<1.5/-1.49	1626246_s_at	vig	vasa intronic gene	chr2L:15064197-15070316 (-) // 100.0 //	0016246 // RNA interference // inferred from physical interaction	0016442 // RNA-induced silencing complex // inferred from physical interaction /// 0016442 // RNA-induced silencing complex // traceable author statement	0003729 // mRNA binding // inferred from sequence or structural similarity
Group 2 vs 1	1624931_at	cib	FBgn0026084	2638.23	1513.43	-1.74321	0	400	DEG	Group 3 vs 1	1624931_at	2638.23	3186.56	1.20784	0	681	DEG_FC<1.5/-1.277	Group 3 vs 2	1624931_at	1513.43	3186.56	2.10552	0	225	DEG	1624931_at	cib	ciboulot	chrX:4000867-4005014 (+) // 100.0 //	0007010 // cytoskeleton organization and biogenesis // inferred from electronic annotation /// 0007420 // brain development // inferred from mutant phenotype /// 0035193 // larval central nervous system remodeling // inferred from mutant phenotype	0005737 // cytoplasm // inferred from electronic annotation /// 0005829 // cytosol // inferred from direct assay	0003779 // actin binding // inferred from sequence or structural similarity /// 0003779 // actin binding // inferred from electronic annotation /// 0003785 // actin monomer binding // inferred from direct assay
Group 2 vs 1	1624074_at	Obp56a	FBgn0034468	1977.53	3439.63	1.73936	0	401	DEG	Group 3 vs 1	1624074_at	1977.53	2381.53	1.2043	0.00236719	1462	DEG_FC<1.5/-1.803	Group 3 vs 2	1624074_at	3439.63	2381.53	-1.44429	0	489	DEG<1.5/-1.35	1624074_at	Obp56a	Odorant-binding protein 56a	chr2R:15585227-15586016 (+) // 100.0 //	0006810 // transport // inferred from electronic annotation /// 0007606 // sensory perception of chemical stimulus // inferred from sequence or structural similarity /// 0007608 // sensory perception of smell // inferred from expression pattern /// 0007608 // sensory perception of smell // inferred from electronic annotation /// 0019236 // response to pheromone // inferred from sequence or struct…	0005576 // extracellular region // inferred from sequence or structural similarity /// 0005576 // extracellular region // inferred from electronic annotation	0005515 // protein binding // inferred from physical interaction /// 0005549 // odorant binding // inferred from sequence or structural similarity /// 0005549 // odorant binding // non-traceable author statement /// 0005549 // odorant binding // inferred from electronic annotation
Group 2 vs 1	1624607_at	CG34200	FBgn0085229	1212.1	2107.87	1.73902	0	402	DEG	Group 3 vs 1	1624607_at	1212.1	1557.76	1.28518	0.00312742	1516	DEG_FC<1.5/-1.867	Group 3 vs 2	1624607_at	2107.87	1557.76	-1.35314	0.00139265	935	DEG<1.5/-1.341	1624607_at	CG34200	---	chr2R:1645268-1645513 (+) // 100.0 //	---	---	---
Group 2 vs 1	1627059_at	und	FBgn0025117	1190.79	2070.45	1.73872	0	403	DEG	Group 3 vs 1	1627059_at	1190.79	1555.05	1.3059	0	569	DEG_FC<1.5/-1.165	Group 3 vs 2	1627059_at	2070.45	1555.05	-1.33143	0.00140517	937	DEG<1.5/-1.415	1627059_at	und	uninitiated	chr2L:9763344-9765358 (+) // 100.0 //	0006508 // proteolysis // inferred from electronic annotation	---	0004177 // aminopeptidase activity // inferred from electronic annotation /// 0005515 // protein binding // inferred from physical interaction /// 0008233 // peptidase activity // inferred from electronic annotation /// 0008235 // metalloexopeptidase activity // inferred from electronic annotation /// 0016787 // hydrolase activity // inferred from electronic annotation /// 0046872 // metal ion bi…
Group 2 vs 1	1640838_s_at	Akap200	FBgn0027932	1231.67	708.681	-1.73797	0	404	DEG	Group 3 vs 1	1640838_s_at	1231.67	1391.97	1.13015	0.0519422		nonDEG	Group 3 vs 2	1640838_s_at	708.681	1391.97	1.96417	0	253	DEG	1640838_s_at	Akap200	A kinase anchor protein 200	chr2L:8415689-8430984 (+) // 100.0 //	0008104 // protein localization // non-traceable author statement /// 0016068 // type I hypersensitivity // inferred from electronic annotation /// 0035071 // salivary gland cell autophagic cell death // inferred from expression pattern /// 0046580 // negative regulation of Ras protein signal transduction // inferred from genetic interaction /// 0048102 // autophagic cell death // inferred from e…	0005811 // lipid particle // inferred from direct assay	0016301 // kinase activity // inferred from electronic annotation /// 0051018 // protein kinase A binding // inferred from physical interaction /// 0051018 // protein kinase A binding // non-traceable author statement
Group 2 vs 1	1626332_s_at	CG11486	FBgn0035397	1200	691.094	-1.73637	0	405	DEG	Group 3 vs 1	1626332_s_at	1200	1133.08	-1.05905	0.0823353		nonDEG	Group 3 vs 2	1626332_s_at	691.094	1133.08	1.63955	0	376	DEG	1626332_s_at	CG11486	polyA-nuclease related	chr3L:3071127-3088674 (+) // 100.0 //	0006468 // protein amino acid phosphorylation // inferred from electronic annotation	---	0004672 // protein kinase activity // inferred from electronic annotation /// 0005515 // protein binding // inferred from physical interaction /// 0005524 // ATP binding // inferred from electronic annotation
Group 2 vs 1	1634700_at	CG8258	FBgn0033342	1406.17	2440.45	1.73552	0	406	DEG	Group 3 vs 1	1634700_at	1406.17	1803.79	1.28276	0	595	DEG_FC<1.5/-1.191	Group 3 vs 2	1634700_at	2440.45	1803.79	-1.35296	0	562	DEG<1.5/-1.108	1634700_at	CG8258	---	chr2R:4792346-4794506 (-) // 100.0 //	0006457 // protein folding // inferred from sequence or structural similarity /// 0006457 // protein folding // inferred from electronic annotation /// 0044267 // cellular protein metabolic process // inferred from electronic annotation	0005737 // cytoplasm // inferred from electronic annotation /// 0005832 // chaperonin-containing T-complex // inferred from sequence or structural similarity	0000166 // nucleotide binding // inferred from electronic annotation /// 0005515 // protein binding // inferred from electronic annotation /// 0005524 // ATP binding // inferred from electronic annotation /// 0016787 // hydrolase activity // inferred from electronic annotation /// 0042623 // ATPase activity, coupled // inferred from sequence or structural similarity /// 0042624 // ATPase activity…
Group 2 vs 1	1632650_at	CG5867	FBgn0027586	1122.35	646.808	-1.73521	0	407	DEG	Group 3 vs 1	1632650_at	1122.35	430.38	-2.60781	0	195	DEG	Group 3 vs 2	1632650_at	646.808	430.38	-1.50287	0.0101263	1573	DEG	1632650_at	CG5867	---	chr2L:13236492-13239292 (+) // 99.62 //	---	---	---
Group 2 vs 1	1641049_at	Cyt-c-p	FBgn0000409	6511.16	11289	1.73379	0	408	DEG	Group 3 vs 1	1641049_at	6511.16	7003.33	1.07559	0.00111527		nonDEG	Group 3 vs 2	1641049_at	11289	7003.33	-1.61195	0	388	DEG	1641049_at	Cyt-c-p	cytochrome c	chr2L:16719873-16722659 (+) // 100.0 //	0006119 // oxidative phosphorylation // inferred from sequence or structural similarity /// 0006810 // transport // inferred from electronic annotation /// 0055114 // oxidation reduction // inferred from direct assay	0005739 // mitochondrion // inferred from direct assay /// 0005739 // mitochondrion // inferred from electronic annotation /// 0005743 // mitochondrial inner membrane // inferred from sequence or structural similarity /// 0005746 // mitochondrial respiratory chain // inferred from electronic annotation /// 0005759 // mitochondrial matrix // inferred from sequence or structural similarity /// 0005…	0005506 // iron ion binding // inferred from electronic annotation /// 0005515 // protein binding // inferred from physical interaction /// 0009055 // electron carrier activity // inferred from direct assay /// 0009055 // electron carrier activity // inferred from sequence or structural similarity /// 0009055 // electron carrier activity // inferred from electronic annotation /// 0020037 // heme …
Group 2 vs 1	1641064_at	CG12607	FBgn0035545	1167.51	2022.33	1.73217	0	409	DEG	Group 3 vs 1	1641064_at	1167.51	973.381	-1.19944	0.0434533		nonDEG	Group 3 vs 2	1641064_at	2022.33	973.381	-2.07763	0	229	DEG	1641064_at	CG12607	---	chr3L:4446574-4448064 (+) // 100.0 //	---	---	0005515 // protein binding // inferred from physical interaction
Group 2 vs 1	1623028_at	CG14872	FBgn0038346	1212.8	700.557	-1.7312	0	410	DEG	Group 3 vs 1	1623028_at	1212.8	672.341	-1.80385	0	299	DEG	Group 3 vs 2	1623028_at	700.557	672.341	-1.04197			nonDEG	1623028_at	CG14872	---	chr3R:11333780-11334560 (-) // 100.0 //	0006810 // transport // inferred from electronic annotation	---	0005215 // transporter activity // inferred from electronic annotation /// 0005488 // binding // inferred from electronic annotation
Group 2 vs 1	1629313_at	CG8661	FBgn0030837	1552.11	2686.63	1.73096	0	411	DEG	Group 3 vs 1	1629313_at	1552.11	1905.91	1.22795	0.00105255	1375	DEG_FC<1.5/-1.513	Group 3 vs 2	1629313_at	2686.63	1905.91	-1.40963	0	507	DEG<1.5/-1.53	1629313_at	CG8661	---	chrX:17177793-17178516 (-) // 100.0 //	---	---	---
Group 2 vs 1	1636183_at	CG32198	FBgn0052198	7755.78	4490.72	-1.72707	0	412	DEG	Group 3 vs 1	1636183_at	7755.78	4215.38	-1.83988	0	292	DEG	Group 3 vs 2	1636183_at	4490.72	4215.38	-1.06532	0.0275046		nonDEG	1636183_at	CG32198	---	chr3L:18520089-18520500 (+) // 100.0 //	---	---	---
Group 2 vs 1	1637967_at	Tim8	FBgn0027359	1510.6	2605.5	1.72481	0	413	DEG	Group 3 vs 1	1637967_at	1510.6	1786.16	1.18242	0.00614256		nonDEG	Group 3 vs 2	1637967_at	2605.5	1786.16	-1.45872	0	482	DEG<1.5/-1.28	1637967_at	Tim8	Tim8	chrX:11262493-11263216 (+) // 100.0 //	0006626 // protein targeting to mitochondrion // inferred from sequence or structural similarity /// 0006626 // protein targeting to mitochondrion // inferred from electronic annotation /// 0006810 // transport // inferred from electronic annotation /// 0015031 // protein transport // inferred from sequence or structural similarity /// 0015031 // protein transport // inferred from electronic anno…	0005739 // mitochondrion // inferred from electronic annotation /// 0005743 // mitochondrial inner membrane // inferred from electronic annotation /// 0005744 // mitochondrial inner membrane presequence translocase complex // inferred from sequence or structural similarity /// 0005744 // mitochondrial inner membrane presequence translocase complex // non-traceable author statement /// 0016020 // …	0005515 // protein binding // inferred from physical interaction /// 0008270 // zinc ion binding // inferred from electronic annotation /// 0015450 // P-P-bond-hydrolysis-driven protein transmembrane transporter activity // inferred from sequence or structural similarity /// 0046872 // metal ion binding // inferred from electronic annotation
Group 2 vs 1	1635445_at	sls	FBgn0086906	1768.46	1025.9	-1.72382	0	414	DEG	Group 3 vs 1	1635445_at	1768.46	1494.55	-1.18328	0.0133089		nonDEG	Group 3 vs 2	1635445_at	1025.9	1494.55	1.45682	0	483	DEG<1.5/-1.29	1635445_at	sls	sallimus	chr3L:2090494-2115617 (-) // 100.0 //	0007049 // cell cycle // inferred from electronic annotation /// 0007062 // sister chromatid cohesion // inferred from mutant phenotype /// 0007067 // mitosis // inferred from electronic annotation /// 0007076 // mitotic chromosome condensation // inferred from mutant phenotype /// 0007519 // skeletal muscle development // inferred from mutant phenotype /// 0007520 // myoblast fusion // inferred …	0000794 // condensed nuclear chromosome // inferred from direct assay /// 0005622 // intracellular // inferred from electronic annotation /// 0005634 // nucleus // inferred from electronic annotation /// 0005737 // cytoplasm // inferred from electronic annotation /// 0030017 // sarcomere // inferred from direct assay /// 0030018 // Z disc // inferred from direct assay /// 0030018 // Z disc // inf…	0003779 // actin binding // inferred from direct assay /// 0003779 // actin binding // inferred from mutant phenotype /// 0005089 // Rho guanyl-nucleotide exchange factor activity // inferred from electronic annotation /// 0008307 // structural constituent of muscle // inferred from mutant phenotype
Group 2 vs 1	1639287_at	CG9877	FBgn0034819	3824.4	2225.82	-1.7182	0	415	DEG	Group 3 vs 1	1639287_at	3824.4	5216.96	1.36413	0	506	DEG_FC<1.5/-1.102	Group 3 vs 2	1639287_at	2225.82	5216.96	2.34384	0	184	DEG	1639287_at	CG9877	---	chr2R:18973401-18973784 (-) // 100.0 //	---	---	---
Group 2 vs 1	1632152_at	CG10992	FBgn0030521	4822.43	2826.55	-1.70612	0	416	DEG	Group 3 vs 1	1632152_at	4822.43	5434.81	1.12699	0.00103081		nonDEG	Group 3 vs 2	1632152_at	2826.55	5434.81	1.92277	0	267	DEG	1632152_at	CG10992	cathepsin B	chrX:13674050-13676214 (-) // 100.0 //	0006508 // proteolysis // inferred from electronic annotation /// 0035071 // salivary gland cell autophagic cell death // inferred from expression pattern /// 0048102 // autophagic cell death // inferred from expression pattern /// 0050790 // regulation of catalytic activity // inferred from electronic annotation	---	0004197 // cysteine-type endopeptidase activity // inferred from electronic annotation /// 0005515 // protein binding // inferred from physical interaction /// 0008233 // peptidase activity // inferred from electronic annotation /// 0008234 // cysteine-type peptidase activity // inferred from electronic annotation /// 0016787 // hydrolase activity // inferred from electronic annotation
Group 2 vs 1	1637159_at	CG9065	FBgn0030610	1148.49	1954.57	1.70186	0	417	DEG	Group 3 vs 1	1637159_at	1148.49	1523.7	1.32669	0.00109689	1379	DEG_FC<1.5/-1.484	Group 3 vs 2	1637159_at	1954.57	1523.7	-1.28278	0.0021525	999	DEG<1.5/-1.580	1637159_at	CG9065	Complex IV copper chaperone	chrX:14978053-14978688 (-) // 100.0 //	0006825 // copper ion transport // inferred from electronic annotation /// 0008535 // respiratory chain complex IV assembly // inferred from sequence or structural similarity	0005758 // mitochondrial intermembrane space // inferred from sequence or structural similarity /// 0005758 // mitochondrial intermembrane space // inferred from electronic annotation	0005507 // copper ion binding // inferred from electronic annotation /// 0016531 // copper chaperone activity // inferred from sequence or structural similarity /// 0016531 // copper chaperone activity // inferred from electronic annotation
Group 2 vs 1	1637342_s_at	l(2)03709	FBgn0010551	3406.76	5793.07	1.70046	0	418	DEG	Group 3 vs 1	1637342_s_at	3406.76	4247.77	1.24686	0	637	DEG_FC<1.5/-1.233	Group 3 vs 2	1637342_s_at	5793.07	4247.77	-1.36379	0	553	DEG<1.5/-1.99	1637342_s_at	l(2)03709	lethal (2) 03709	chr2R:14706989-14709346 (+) // 100.0 //	---	0005811 // lipid particle // inferred from direct assay /// 0016020 // membrane // inferred from electronic annotation	---
Group 2 vs 1	1634782_s_at	Cctgamma	FBgn0015019	1091.72	1855.64	1.69975	0	419	DEG	Group 3 vs 1	1634782_s_at	1091.72	1408.6	1.29026	0.00186573	1453	DEG_FC<1.5/-1.658	Group 3 vs 2	1634782_s_at	1855.64	1408.6	-1.31737	0.00131366	917	DEG<1.5/-1.464	1634782_s_at	Cctgamma	predicted gene Y	chr3R:12473328-12475700 (+) // 100.0 //	0006457 // protein folding // inferred from sequence or structural similarity /// 0006457 // protein folding // non-traceable author statement /// 0006457 // protein folding // inferred from electronic annotation /// 0007052 // mitotic spindle organization and biogenesis // inferred from mutant phenotype /// 0044267 // cellular protein metabolic process // inferred from electronic annotation	0005737 // cytoplasm // non-traceable author statement /// 0005737 // cytoplasm // inferred from electronic annotation /// 0005832 // chaperonin-containing T-complex // inferred from sequence or structural similarity	0000166 // nucleotide binding // inferred from electronic annotation /// 0005515 // protein binding // inferred from electronic annotation /// 0005524 // ATP binding // inferred from electronic annotation /// 0016787 // hydrolase activity // inferred from electronic annotation /// 0042623 // ATPase activity, coupled // inferred from sequence or structural similarity /// 0042623 // ATPase activity…
Group 2 vs 1	1627212_at	ref(2)P	FBgn0003231	1771.89	1042.75	-1.69924	0	420	DEG	Group 3 vs 1	1627212_at	1771.89	1309.47	-1.35313	0	522	DEG_FC<1.5/-1.118	Group 3 vs 2	1627212_at	1042.75	1309.47	1.25578	0.000987836	803	DEG<1.5/-1.706	1627212_at	ref(2)P	refractaire	chr2L:19542445-19545548 (+) // 100.0 //	0006470 // protein amino acid dephosphorylation // non-traceable author statement /// 0019058 // viral infectious cycle // non-traceable author statement	0005634 // nucleus // non-traceable author statement /// 0005634 // nucleus // inferred from electronic annotation	0003677 // DNA binding // inferred from electronic annotation /// 0004725 // protein tyrosine phosphatase activity // non-traceable author statement /// 0005515 // protein binding // inferred from physical interaction /// 0008270 // zinc ion binding // inferred from electronic annotation /// 0016787 // hydrolase activity // inferred from electronic annotation /// 0046872 // metal ion binding // i…
Group 2 vs 1	1631761_at	CG31313	FBgn0051313	5116.15	3011.99	-1.6986	0	421	DEG	Group 3 vs 1	1631761_at	5116.15	5822.82	1.13813	0		nonDEG	Group 3 vs 2	1631761_at	3011.99	5822.82	1.93321	0	264	DEG	1631761_at	CG31313	---	chr3R:10392301-10393148 (-) // 100.0 //	---	---	0004869 // cysteine protease inhibitor activity // inferred from electronic annotation
Group 2 vs 1	1624981_a_at	CG10576	FBgn0035630	1669.74	2833.29	1.69684	0	422	DEG	Group 3 vs 1	1624981_a_at	1669.74	1972.86	1.18153	0.00175117		nonDEG	Group 3 vs 2	1624981_a_at	2833.29	1972.86	-1.43613	0	493	DEG<1.5/-1.39	1624981_a_at	CG10576	proliferation-associated protein	chr3L:5755126-5758631 (-) // 100.0 //	0006508 // proteolysis // inferred from electronic annotation	---	0004177 // aminopeptidase activity // inferred from electronic annotation /// 0005515 // protein binding // inferred from physical interaction /// 0008235 // metalloexopeptidase activity // inferred from electronic annotation /// 0016787 // hydrolase activity // inferred from electronic annotation
Group 2 vs 1	1626382_s_at	CG13887	FBgn0035165	4287.96	2532.17	-1.69339	0	423	DEG	Group 3 vs 1	1626382_s_at	4287.96	3351.06	-1.27958	0	600	DEG_FC<1.5/-1.196	Group 3 vs 2	1626382_s_at	2532.17	3351.06	1.3234	0	606	DEG<1.5/-1.152	1626382_s_at	CG13887	---	chr3L:837855-839747 (+) // 100.0 //	0006886 // intracellular protein transport // inferred from electronic annotation	0005783 // endoplasmic reticulum // inferred from electronic annotation /// 0016021 // integral to membrane // inferred from electronic annotation	0005515 // protein binding // inferred from physical interaction
Group 2 vs 1	1638669_at	CG11395	FBgn0034200	1179.73	697.589	-1.69115	0	424	DEG	Group 3 vs 1	1638669_at	1179.73	856.207	-1.37785	0.00147512	1421	DEG_FC<1.5/-1.470	Group 3 vs 2	1638669_at	697.589	856.207	1.22738	0.00431241	1228	DEG<1.5/-1.856	1638669_at	CG11395	---	chr2R:13024745-13026337 (+) // 100.0 //	---	---	---
Group 2 vs 1	1630771_s_at	l(2)37Cc	FBgn0002031	1960.36	3314.62	1.69083	0	425	DEG	Group 3 vs 1	1630771_s_at	1960.36	2279.13	1.16261	0.00574638		nonDEG	Group 3 vs 2	1630771_s_at	3314.62	2279.13	-1.45434	0	484	DEG<1.5/-1.30	1630771_s_at	l(2)37Cc	transcription unit No. 4	chr2L:19122039-19123852 (-) // 100.0 //	0002165 // instar larval or pupal development // non-traceable author statement /// 0007275 // multicellular organismal development // inferred from electronic annotation	0005737 // cytoplasm // inferred from direct assay /// 0005739 // mitochondrion // inferred from direct assay /// 0005739 // mitochondrion // inferred from sequence or structural similarity /// 0005740 // mitochondrial envelope // non-traceable author statement /// 0005811 // lipid particle // inferred from direct assay /// 0016020 // membrane // inferred from electronic annotation	0005515 // protein binding // inferred from physical interaction
Group 2 vs 1	1640065_at	GstE7	FBgn0063493	1467.21	867.757	-1.69081	0	426	DEG	Group 3 vs 1	1640065_at	1467.21	1212.81	-1.20976	0.0143449	1815	DEG_FC<1.5/-1.1508	Group 3 vs 2	1640065_at	867.757	1212.81	1.39763	0.00180202	954	DEG<1.5/-1.216	1640065_at	GstE7	Glutathione S transferase E7	chr2R:14294439-14295193 (+) // 100.0 //	---	---	0004364 // glutathione transferase activity // inferred from sequence or structural similarity /// 0004364 // glutathione transferase activity // inferred from electronic annotation /// 0016740 // transferase activity // inferred from electronic annotation
Group 2 vs 1	1634072_s_at	Hmgs	FBgn0010611	1371.14	2316.79	1.68968	0	427	DEG	Group 3 vs 1	1634072_s_at	1371.14	1282.8	-1.06886	0.0680213		nonDEG	Group 3 vs 2	1634072_s_at	2316.79	1282.8	-1.80604	0	306	DEG	1634072_s_at	Hmgs	HMG-CoA synthase	chr2R:12223594-12228760 (+) // 100.0 //	0001700 // embryonic development via the syncytial blastoderm // inferred from mutant phenotype /// 0008152 // metabolic process // inferred from electronic annotation /// 0008299 // isoprenoid biosynthetic process // inferred from electronic annotation	---	0003824 // catalytic activity // inferred from electronic annotation /// 0004421 // hydroxymethylglutaryl-CoA synthase activity // inferred from sequence or structural similarity /// 0004421 // hydroxymethylglutaryl-CoA synthase activity // inferred from electronic annotation /// 0008415 // acyltransferase activity // inferred from electronic annotation /// 0016740 // transferase activity // infe…
Group 2 vs 1	1638229_at	l(3)01239	FBgn0010741	1300.55	2197.04	1.68932	0	428	DEG	Group 3 vs 1	1638229_at	1300.55	1725	1.32636	0	552	DEG_FC<1.5/-1.148	Group 3 vs 2	1638229_at	2197.04	1725	-1.27365	0.00141471	940	DEG<1.5/-1.622	1638229_at	l(3)01239	lethal (3) 01239	chr3L:11066565-11067490 (-) // 100.0 //	0006457 // protein folding // inferred from electronic annotation /// 0006458 // 'de novo' protein folding // inferred from sequence or structural similarity /// 0006911 // phagocytosis, engulfment // inferred from mutant phenotype /// 0048477 // oogenesis // inferred from mutant phenotype	0016272 // prefoldin complex // inferred from electronic annotation /// 0016272 // prefoldin complex // inferred from sequence or structural similarity	0005515 // protein binding // inferred from physical interaction /// 0051082 // unfolded protein binding // inferred from electronic annotation /// 0051087 // chaperone binding // inferred from sequence or structural similarity
Group 2 vs 1	1639229_at	vkg	FBgn0016075	3808.6	6433.21	1.68913	0	429	DEG	Group 3 vs 1	1639229_at	3808.6	4509.16	1.18394	0.00106946		nonDEG	Group 3 vs 2	1639229_at	6433.21	4509.16	-1.4267	0	496	DEG<1.5/-1.42	1639229_at	vkg	type IV collagen, alpha-chain	chr2L:5012143-5027412 (-) // 100.0 //	0006817 // phosphate transport // inferred from electronic annotation	0005581 // collagen // inferred from electronic annotation /// 0005581 // collagen // non-traceable author statement /// 0005587 // collagen type IV // non-traceable author statement /// 0005737 // cytoplasm // inferred from electronic annotation /// 0005811 // lipid particle // inferred from direct assay	0005201 // extracellular matrix structural constituent // inferred from electronic annotation /// 0005488 // binding // inferred from electronic annotation
Group 2 vs 1	1636579_s_at	mdy	FBgn0004797	1031.5	612.066	-1.68527	0	430	DEG	Group 3 vs 1	1636579_s_at	1031.5	654.769	-1.57536	0	381	DEG	Group 3 vs 2	1636579_s_at	612.066	654.769	1.06977	0.138725		nonDEG	1636579_s_at	mdy	midway	chr2L:16816664-16826973 (+) // 100.0 //	0019432 // triacylglycerol biosynthetic process // inferred from sequence or structural similarity /// 0045477 // regulation of nurse cell apoptosis // inferred from mutant phenotype /// 0048477 // oogenesis // inferred from mutant phenotype	0016020 // membrane // inferred from electronic annotation /// 0016021 // integral to membrane // inferred from electronic annotation	0004144 // diacylglycerol O-acyltransferase activity // inferred from direct assay /// 0004144 // diacylglycerol O-acyltransferase activity // inferred from sequence or structural similarity /// 0004144 // diacylglycerol O-acyltransferase activity // non-traceable author statement /// 0004144 // diacylglycerol O-acyltransferase activity // inferred from electronic annotation /// 0004772 // sterol…
Group 2 vs 1	1637359_at	Lsd-2	FBgn0030608	2704.07	1606.11	-1.68362	0	431	DEG	Group 3 vs 1	1637359_at	2704.07	1992.14	-1.35737	0	514	DEG_FC<1.5/-1.110	Group 3 vs 2	1637359_at	1606.11	1992.14	1.24035	0	714	DEG<1.5/-1.260	1637359_at	Lsd-2	Lipid storage droplet-2	chrX:14965488-14970236 (-) // 100.0 //	0006629 // lipid metabolic process // inferred from mutant phenotype /// 0006810 // transport // inferred from electronic annotation /// 0006869 // lipid transport // inferred from electronic annotation /// 0006869 // lipid transport // inferred from expression pattern /// 0007275 // multicellular organismal development // inferred from electronic annotation /// 0019915 // sequestering of lipid /…	0005737 // cytoplasm // inferred from electronic annotation /// 0005811 // lipid particle // inferred from direct assay /// 0005811 // lipid particle // non-traceable author statement /// 0005811 // lipid particle // inferred from electronic annotation /// 0012511 // monolayer-surrounded lipid storage body // inferred from electronic annotation	0005515 // protein binding // inferred from physical interaction
Group 2 vs 1	1637492_at	epsilonTry	FBgn0010425	12531.2	7446.29	-1.68288	0	432	DEG	Group 3 vs 1	1637492_at	12531.2	4922.64	-2.54563	0	199	DEG	Group 3 vs 2	1637492_at	7446.29	4922.64	-1.51266	0	442	DEG	1637492_at	epsilonTry	epsilonTrypsin	chr2R:7232733-7233567 (-) // 100.0 //	0006508 // proteolysis // inferred from electronic annotation /// 0006508 // proteolysis // non-traceable author statement	0005576 // extracellular region // non-traceable author statement /// 0005576 // extracellular region // inferred from electronic annotation	0003824 // catalytic activity // inferred from electronic annotation /// 0004252 // serine-type endopeptidase activity // inferred from electronic annotation /// 0005515 // protein binding // inferred from physical interaction /// 0008233 // peptidase activity // inferred from electronic annotation /// 0016787 // hydrolase activity // inferred from electronic annotation
Group 2 vs 1	1626221_at	Glycogenin	FBgn0034603	2790.33	1659.9	-1.68102	0	433	DEG	Group 3 vs 1	1626221_at	2790.33	2709.24	-1.02993	0.107617		nonDEG	Group 3 vs 2	1626221_at	1659.9	2709.24	1.63217	0	381	DEG	1626221_at	Glycogenin	Glycogenin	chr2R:17087991-17100118 (+) // 100.0 //	0007498 // mesoderm development // inferred from expression pattern /// 0016051 // carbohydrate biosynthetic process // inferred from electronic annotation	---	0005515 // protein binding // inferred from physical interaction /// 0008466 // glycogenin glucosyltransferase activity // inferred from sequence or structural similarity /// 0008466 // glycogenin glucosyltransferase activity // inferred from electronic annotation /// 0016740 // transferase activity // inferred from electronic annotation /// 0016757 // transferase activity, transferring glycosyl …
Group 2 vs 1	1631496_at	CG4563	FBgn0035006	1452.37	2433.47	1.67552	0	434	DEG	Group 3 vs 1	1631496_at	1452.37	1585.74	1.09183	0.0304274		nonDEG	Group 3 vs 2	1631496_at	2433.47	1585.74	-1.5346	0	430	DEG	1631496_at	CG4563	---	chr2R:20338604-20340560 (-) // 100.0 //	0008152 // metabolic process // inferred from electronic annotation	---	0003824 // catalytic activity // inferred from electronic annotation /// 0005515 // protein binding // inferred from physical interaction /// 0016207 // 4-coumarate-CoA ligase activity // inferred from sequence or structural similarity /// 0016207 // 4-coumarate-CoA ligase activity // inferred from electronic annotation /// 0016874 // ligase activity // inferred from electronic annotation
Group 2 vs 1	1641193_s_at	vig2	FBgn0046214	2464.86	4119.34	1.67123	0	435	DEG	Group 3 vs 1	1641193_s_at	2464.86	2994.34	1.21481	0	668	DEG_FC<1.5/-1.264	Group 3 vs 2	1641193_s_at	4119.34	2994.34	-1.37571	0	540	DEG<1.5/-1.86	1641193_s_at	vig2	vig2	chrYHet:305268-307006 (+) // 66.52 // /// chr3R:20949094-20951348 (+) // 100.0 //	---	---	0005515 // protein binding // inferred from physical interaction
Group 2 vs 1	1639943_at	Acox57D-p	FBgn0034628	1646.49	989.054	-1.66471	0	436	DEG	Group 3 vs 1	1639943_at	1646.49	2259.57	1.37235	0	497	DEG_FC<1.5/-1.93	Group 3 vs 2	1639943_at	989.054	2259.57	2.28458	0	190	DEG	1639943_at	Acox57D-p	acyl co-enzyme A oxidase	chr2R:17273858-17276788 (+) // 100.0 //	0006631 // fatty acid metabolic process // inferred from electronic annotation /// 0006635 // fatty acid beta-oxidation // inferred from electronic annotation /// 0008152 // metabolic process // inferred from electronic annotation /// 0055114 // oxidation reduction // inferred from electronic annotation	0005777 // peroxisome // inferred from sequence or structural similarity /// 0005777 // peroxisome // inferred from electronic annotation	0003995 // acyl-CoA dehydrogenase activity // inferred from electronic annotation /// 0003997 // acyl-CoA oxidase activity // inferred from sequence or structural similarity /// 0003997 // acyl-CoA oxidase activity // inferred from electronic annotation /// 0009055 // electron carrier activity // inferred from electronic annotation /// 0016401 // palmitoyl-CoA oxidase activity // inferred from se…
Group 2 vs 1	1627430_at	CG8888	FBgn0033679	1719.2	1032.92	-1.6644	0	437	DEG	Group 3 vs 1	1627430_at	1719.2	1604.13	-1.07174	0.0804817		nonDEG	Group 3 vs 2	1627430_at	1032.92	1604.13	1.55299	0	421	DEG	1627430_at	CG8888	---	chr2R:7952067-7967046 (-) // 100.0 //	0008152 // metabolic process // inferred from electronic annotation	---	0003824 // catalytic activity // inferred from electronic annotation /// 0005488 // binding // inferred from electronic annotation /// 0016491 // oxidoreductase activity // inferred from electronic annotation /// 0016614 // oxidoreductase activity, acting on CH-OH group of donors // inferred from sequence or structural similarity
Group 2 vs 1	1633048_at	CG8193	FBgn0033367	2861.92	1722.42	-1.66157	0	438	DEG	Group 3 vs 1	1633048_at	2861.92	2893.25	1.01095	0.0495641		nonDEG	Group 3 vs 2	1633048_at	1722.42	2893.25	1.67976	0	351	DEG	1633048_at	CG8193	---	chr2R:4929764-4932213 (-) // 100.0 //	0006583 // melanin biosynthetic process from tyrosine // inferred from electronic annotation /// 0006810 // transport // inferred from electronic annotation /// 0006952 // defense response // non-traceable author statement /// 0008152 // metabolic process // inferred from electronic annotation /// 0055114 // oxidation reduction // inferred from electronic annotation	0005576 // extracellular region // inferred from direct assay /// 0005576 // extracellular region // inferred from electronic annotation	0004497 // monooxygenase activity // inferred from electronic annotation /// 0004503 // monophenol monooxygenase activity // inferred from sequence or structural similarity /// 0004503 // monophenol monooxygenase activity // non-traceable author statement /// 0004503 // monophenol monooxygenase activity // inferred from electronic annotation /// 0005344 // oxygen transporter activity // inferred …
Group 2 vs 1	1629813_at	CG17691	FBgn0039993	2620.03	4351.09	1.66071	0	439	DEG	Group 3 vs 1	1629813_at	2620.03	3767.3	1.43789	0	445	DEG_FC<1.5/-1.41	Group 3 vs 2	1629813_at	4351.09	3767.3	-1.15496	0.00133326		nonDEG	1629813_at	CG17691	---	chrU:1178889-1184794 (+) // 100.0 //	0008152 // metabolic process // inferred from electronic annotation /// 0046949 // acyl-CoA biosynthetic process // inferred from sequence or structural similarity /// 0055114 // oxidation reduction // inferred from electronic annotation	0017086 // 3-methyl-2-oxobutanoate dehydrogenase (lipoamide) complex // inferred from sequence or structural similarity	0003824 // catalytic activity // inferred from electronic annotation /// 0003863 // 3-methyl-2-oxobutanoate dehydrogenase (2-methylpropanoyl-transferring) activity // inferred from sequence or structural similarity /// 0003863 // 3-methyl-2-oxobutanoate dehydrogenase (2-methylpropanoyl-transferring) activity // inferred from electronic annotation /// 0016491 // oxidoreductase activity // inferred…
Group 2 vs 1	1626492_s_at	Sop2	FBgn0001961	1111.95	1842.47	1.65698	0	440	DEG	Group 3 vs 1	1626492_s_at	1111.95	1951.68	1.75519	0	319	DEG	Group 3 vs 2	1626492_s_at	1842.47	1951.68	1.05927	0.0207022		nonDEG	1626492_s_at	Sop2	Suppressor of profilin 2	chr2L:13827931-13829739 (-) // 100.0 //	0001745 // compound eye morphogenesis // inferred from mutant phenotype /// 0007010 // cytoskeleton organization and biogenesis // inferred from sequence or structural similarity /// 0007303 // cytoplasmic transport, nurse cell to oocyte // inferred from mutant phenotype /// 0007409 // axonogenesis // inferred from genetic interaction /// 0007413 // axonal fasciculation // inferred from genetic i…	0005856 // cytoskeleton // inferred from electronic annotation /// 0005885 // Arp2/3 protein complex // non-traceable author statement /// 0005885 // Arp2/3 protein complex // traceable author statement	0003779 // actin binding // inferred from electronic annotation /// 0003779 // actin binding // inferred from sequence or structural similarity
Group 2 vs 1	1627242_at	l(2)efl	FBgn0011296	7074.79	4269.95	-1.65688	0	441	DEG	Group 3 vs 1	1627242_at	7074.79	6519.3	-1.08521	0.00565		nonDEG	Group 3 vs 2	1627242_at	4269.95	6519.3	1.52678	0	431	DEG	1627242_at	l(2)efl	lethal (2) essential for life	chr2R:19572173-19573063 (-) // 100.0 //	0006950 // response to stress // inferred from electronic annotation /// 0007275 // multicellular organismal development // inferred from electronic annotation /// 0009408 // response to heat // non-traceable author statement /// 0009790 // embryonic development // non-traceable author statement	---	0042802 // identical protein binding // inferred from physical interaction
Group 2 vs 1	1634899_a_at	CG6512	FBgn0036702	1139.5	1883.15	1.65261	0	442	DEG	Group 3 vs 1	1634899_a_at	1139.5	1470.42	1.29041	0.00183994	1450	DEG_FC<1.5/-1.657	Group 3 vs 2	1634899_a_at	1883.15	1470.42	-1.28069	0.00213049	993	DEG<1.5/-1.584	1634899_a_at	CG6512	---	chr3L:17231716-17235223 (-) // 100.0 //	0006508 // proteolysis // inferred from electronic annotation /// 0006510 // ATP-dependent proteolysis // inferred from sequence or structural similarity /// 0030163 // protein catabolic process // inferred from electronic annotation	0005739 // mitochondrion // inferred from sequence or structural similarity /// 0005783 // endoplasmic reticulum // inferred from sequence or structural similarity /// 0016020 // membrane // inferred from electronic annotation /// 0016021 // integral to membrane // inferred from electronic annotation	0000166 // nucleotide binding // inferred from electronic annotation /// 0004222 // metalloendopeptidase activity // inferred from sequence or structural similarity /// 0004222 // metalloendopeptidase activity // inferred from electronic annotation /// 0005515 // protein binding // inferred from physical interaction /// 0005524 // ATP binding // inferred from electronic annotation /// 0008270 // …
Group 2 vs 1	1626641_s_at	glob1	FBgn0027657	4942.8	2998.61	-1.64836	0	443	DEG	Group 3 vs 1	1626641_s_at	4942.8	2771.63	-1.78335	0	307	DEG	Group 3 vs 2	1626641_s_at	2998.61	2771.63	-1.08189	0.0308009		nonDEG	1626641_s_at	glob1	Hemoglobin	chr3R:11722647-11730285 (-) // 100.0 //	0006810 // transport // inferred from electronic annotation /// 0015671 // oxygen transport // inferred from electronic annotation	---	0005344 // oxygen transporter activity // inferred from sequence or structural similarity /// 0005344 // oxygen transporter activity // inferred from electronic annotation /// 0005506 // iron ion binding // inferred from electronic annotation /// 0005515 // protein binding // inferred from physical interaction /// 0019825 // oxygen binding // inferred from electronic annotation /// 0020037 // hem…
Group 2 vs 1	1636196_s_at	CG6891 /// CG6900	FBgn0030955 /// FBgn0030958	2545.67	1547.79	-1.64471	0	444	DEG	Group 3 vs 1	1636196_s_at	2545.67	2825.88	1.11007	0.00311521		nonDEG	Group 3 vs 2	1636196_s_at	1547.79	2825.88	1.82575	0	299	DEG	1636196_s_at	CG6891 /// CG6900	--- /// ---	chrX:18679753-18680156 (+) // 100.0 //	---	0005622 // intracellular // inferred from electronic annotation	0003779 // actin binding // inferred from electronic annotation /// 0005515 // protein binding // inferred from physical interaction
Group 2 vs 1	1629222_at	Ahcy13	FBgn0014455	2477.26	4073.54	1.64437	0	445	DEG	Group 3 vs 1	1629222_at	2477.26	3739.8	1.50965	0	406	DEG	Group 3 vs 2	1629222_at	4073.54	3739.8	-1.08924	0.0322362		nonDEG	1629222_at	Ahcy13	AdoHcyase	chrUextra:1682137-1682855 (+) // 44.85 // /// chrX:15344294-15346683 (+) // 100.0 // /// chrUextra:17524322-17524917 (-) // 37.16 //	0006730 // one-carbon compound metabolic process // inferred from electronic annotation /// 0008152 // metabolic process // inferred from electronic annotation	---	0003824 // catalytic activity // inferred from electronic annotation /// 0004013 // adenosylhomocysteinase activity // inferred from sequence or structural similarity /// 0004013 // adenosylhomocysteinase activity // non-traceable author statement /// 0004013 // adenosylhomocysteinase activity // inferred from electronic annotation /// 0005488 // binding // inferred from electronic annotation ///…
Group 2 vs 1	1641229_at	CG14265	FBgn0040393	2253.05	3697.8	1.64124	0	446	DEG	Group 3 vs 1	1641229_at	2253.05	2991.29	1.32766	0	550	DEG_FC<1.5/-1.146	Group 3 vs 2	1641229_at	3697.8	2991.29	-1.23619	0.00500908	1288	DEG<1.5/-1.805	1641229_at	CG14265	---	chrX:3130156-3130715 (-) // 100.0 //	---	---	---
Group 2 vs 1	1636618_at	CG8664 /// sesB	FBgn0030836	2355.04	3844.84	1.6326	0	447	DEG	Group 3 vs 1	1636618_at	2355.04	4158.92	1.76597	0	315	DEG	Group 3 vs 2	1636618_at	3844.84	4158.92	1.08169	0.00491809		nonDEG	1636618_at	CG8664 /// sesB	--- /// lethal(1)9Ed	chrX:17175805-17176744 (-) // 100.0 //	0006810 // transport // inferred from electronic annotation /// 0006839 // mitochondrial transport // inferred from mutant phenotype /// 0006911 // phagocytosis, engulfment // inferred from mutant phenotype /// 0007629 // flight behavior // inferred from mutant phenotype /// 0009612 // response to mechanical stimulus // inferred from mutant phenotype /// 0015672 // monovalent inorganic cation tra…	0005739 // mitochondrion // inferred from electronic annotation /// 0005740 // mitochondrial envelope // inferred from sequence or structural similarity /// 0005743 // mitochondrial inner membrane // inferred from sequence or structural similarity /// 0005743 // mitochondrial inner membrane // non-traceable author statement /// 0005743 // mitochondrial inner membrane // inferred from direct assay…	0005215 // transporter activity // inferred from electronic annotation /// 0005261 // cation channel activity // inferred from electronic annotation /// 0005471 // ATP:ADP antiporter activity // inferred from mutant phenotype /// 0005471 // ATP:ADP antiporter activity // inferred from sequence or structural similarity /// 0005471 // ATP:ADP antiporter activity // non-traceable author statement //…
Group 2 vs 1	1629790_at	CG11267	FBgn0036334	3208.22	5228.05	1.62958	0	448	DEG	Group 3 vs 1	1629790_at	3208.22	3262.57	1.01694	0.0695227		nonDEG	Group 3 vs 2	1629790_at	5228.05	3262.57	-1.60243	0	396	DEG	1629790_at	CG11267	---	chr3L:13009156-13010007 (+) // 100.0 //	0006457 // protein folding // inferred from electronic annotation /// 0006458 // 'de novo' protein folding // inferred from sequence or structural similarity	0005739 // mitochondrion // inferred from sequence or structural similarity /// 0005759 // mitochondrial matrix // inferred from sequence or structural similarity /// 0005811 // lipid particle // inferred from direct assay	0005515 // protein binding // inferred from physical interaction /// 0005524 // ATP binding // inferred from electronic annotation /// 0016787 // hydrolase activity // inferred from electronic annotation /// 0042624 // ATPase activity, uncoupled // inferred from electronic annotation /// 0051082 // unfolded protein binding // inferred from sequence or structural similarity
Group 2 vs 1	1624587_at	CG13323	FBgn0033788	5977.2	3669.49	-1.62889	0	449	DEG	Group 3 vs 1	1624587_at	5977.2	4388.39	-1.36205	0	510	DEG_FC<1.5/-1.106	Group 3 vs 2	1624587_at	3669.49	4388.39	1.19591	0		nonDEG	1624587_at	CG13323	---	chr2R:8934382-8934793 (-) // 100.0 //	---	---	---
Group 2 vs 1	1636626_s_at	CG33713 /// CG33714	FBgn0064116 /// FBgn0064117	2045.98	3329.98	1.62758	0	450	DEG	Group 3 vs 1	1636626_s_at	2045.98	2414.43	1.18009	0.00369691		nonDEG	Group 3 vs 2	1636626_s_at	3329.98	2414.43	-1.3792	0	537	DEG<1.5/-1.83	1636626_s_at	CG33713 /// CG33714	--- /// ---	chrX:21188960-21190299 (-) // 100.0 //	---	---	0000062 // acyl-CoA binding // inferred from sequence or structural similarity /// 0000062 // acyl-CoA binding // inferred from electronic annotation /// 0000166 // nucleotide binding // inferred from electronic annotation /// 0003676 // nucleic acid binding // inferred from electronic annotation /// 0003729 // mRNA binding // inferred from sequence or structural similarity /// 0005488 // binding…
Group 2 vs 1	1635446_at	CG15043 /// DsimCG15043	FBgn0030929	5323.95	3274.42	-1.62592	0	451	DEG	Group 3 vs 1	1635446_at	5323.95	2738.01	-1.94446	0	274	DEG	Group 3 vs 2	1635446_at	3274.42	2738.01	-1.19591	0.00831885		nonDEG	1635446_at	CG15043 /// DsimCG15043	--- /// ---	chrX:18387433-18388197 (-) // 100.0 //	---	---	---
Group 2 vs 1	1624069_at	CG7296	FBgn0032283	3866.04	2381.78	-1.62317	0	452	DEG	Group 3 vs 1	1624069_at	3866.04	4914.89	1.2713	0	612	DEG_FC<1.5/-1.208	Group 3 vs 2	1624069_at	2381.78	4914.89	2.06354	0	233	DEG	1624069_at	CG7296	---	chr2L:10686375-10686988 (-) // 100.0 //	---	---	---
Group 2 vs 1	1631205_a_at	CG6084	FBgn0086254	3944.71	6379.91	1.61733	0	453	DEG	Group 3 vs 1	1631205_a_at	3944.71	5606.75	1.42133	0	458	DEG_FC<1.5/-1.54	Group 3 vs 2	1631205_a_at	6379.91	5606.75	-1.1379	0.00119105		nonDEG	1631205_a_at	CG6084	ESTS:34F4T	chr3L:11613634-11616785 (-) // 100.0 //	0055114 // oxidation reduction // inferred from electronic annotation	---	0004032 // aldehyde reductase activity // inferred from electronic annotation /// 0016491 // oxidoreductase activity // inferred from electronic annotation
Group 2 vs 1	1637509_s_at	CG42497 /// Tim10	FBgn0027360	1750.48	2830.12	1.61677	0	454	DEG	Group 3 vs 1	1637509_s_at	1750.48	2064.21	1.17923	0.00664773		nonDEG	Group 3 vs 2	1637509_s_at	2830.12	2064.21	-1.37104	0	545	DEG<1.5/-1.91	1637509_s_at	CG42497 /// Tim10	--- /// Tim10	chr2R:17577712-17578614 (-) // 100.0 //	0006626 // protein targeting to mitochondrion // inferred from sequence or structural similarity /// 0006626 // protein targeting to mitochondrion // inferred from electronic annotation /// 0006810 // transport // inferred from electronic annotation /// 0015031 // protein transport // non-traceable author statement /// 0015031 // protein transport // inferred from electronic annotation /// 004503…	0005739 // mitochondrion // inferred from electronic annotation /// 0005743 // mitochondrial inner membrane // inferred from electronic annotation /// 0005744 // mitochondrial inner membrane presequence translocase complex // inferred from sequence or structural similarity /// 0005744 // mitochondrial inner membrane presequence translocase complex // non-traceable author statement /// 0016020 // …	0005515 // protein binding // inferred from physical interaction /// 0008270 // zinc ion binding // inferred from electronic annotation /// 0008565 // protein transporter activity // inferred from sequence or structural similarity /// 0015450 // P-P-bond-hydrolysis-driven protein transmembrane transporter activity // inferred from sequence or structural similarity /// 0015450 // P-P-bond-hydrolys…
Group 2 vs 1	1628018_at	Hml	FBgn0029167	1422.68	882.671	-1.61179	0	455	DEG	Group 3 vs 1	1628018_at	1422.68	1122.01	-1.26797	0.00153564	1425	DEG_FC<1.5/-1.501	Group 3 vs 2	1628018_at	882.671	1122.01	1.27115	0.00106525	840	DEG<1.5/-1.636	1628018_at	Hml	hemolectin	chr3L:13839153-13853113 (+) // 100.0 //	0006030 // chitin metabolic process // inferred from electronic annotation /// 0007155 // cell adhesion // inferred from electronic annotation /// 0007599 // hemostasis // inferred from expression pattern /// 0007599 // hemostasis // inferred from mutant phenotype /// 0035006 // melanization defense response // inferred from mutant phenotype /// 0042060 // wound healing // inferred from mutant ph…	0005576 // extracellular region // inferred from direct assay /// 0005576 // extracellular region // inferred from electronic annotation	0005529 // sugar binding // inferred from sequence or structural similarity /// 0008061 // chitin binding // inferred from electronic annotation /// 0042803 // protein homodimerization activity // inferred from direct assay
Group 2 vs 1	1632306_at	CG9467	FBgn0037758	1275.54	791.449	-1.61165	0	456	DEG	Group 3 vs 1	1632306_at	1275.54	1163.35	-1.09644	0.0302967		nonDEG	Group 3 vs 2	1632306_at	791.449	1163.35	1.46989	0	476	DEG<1.5/-1.22	1632306_at	CG9467	---	chr3R:5623495-5626773 (-) // 100.0 //	0006006 // glucose metabolic process // inferred from electronic annotation /// 0006813 // potassium ion transport // inferred from electronic annotation /// 0055114 // oxidation reduction // inferred from electronic annotation	0008076 // voltage-gated potassium channel complex // inferred from electronic annotation /// 0016020 // membrane // inferred from electronic annotation	0004365 // glyceraldehyde-3-phosphate dehydrogenase (phosphorylating) activity // inferred from electronic annotation /// 0005249 // voltage-gated potassium channel activity // inferred from electronic annotation /// 0005515 // protein binding // inferred from electronic annotation /// 0005515 // protein binding // inferred from physical interaction /// 0016491 // oxidoreductase activity // infer…
Group 2 vs 1	1626845_at	Tcp-1eta	FBgn0037632	2420.95	3894.77	1.60878	0	457	DEG	Group 3 vs 1	1626845_at	2420.95	2926.32	1.20875	0	680	DEG_FC<1.5/-1.276	Group 3 vs 2	1626845_at	3894.77	2926.32	-1.33094	0	600	DEG<1.5/-1.146	1626845_at	Tcp-1eta	CG8351	chr3R:4627274-4631958 (+) // 100.0 //	0006457 // protein folding // inferred from sequence or structural similarity /// 0006457 // protein folding // inferred from electronic annotation /// 0006468 // protein amino acid phosphorylation // inferred from electronic annotation /// 0007052 // mitotic spindle organization and biogenesis // inferred from mutant phenotype /// 0044267 // cellular protein metabolic process // inferred from el…	0005737 // cytoplasm // inferred from electronic annotation /// 0005832 // chaperonin-containing T-complex // inferred from sequence or structural similarity	0000166 // nucleotide binding // inferred from electronic annotation /// 0004672 // protein kinase activity // inferred from electronic annotation /// 0005515 // protein binding // inferred from electronic annotation /// 0005524 // ATP binding // inferred from electronic annotation /// 0016787 // hydrolase activity // inferred from electronic annotation /// 0042623 // ATPase activity, coupled // …
Group 2 vs 1	1636176_at	eIF-2beta	FBgn0004926	2389.84	3831.97	1.60345	0	458	DEG	Group 3 vs 1	1636176_at	2389.84	3094.21	1.29474	0	581	DEG_FC<1.5/-1.177	Group 3 vs 2	1636176_at	3831.97	3094.21	-1.23843	0	719	DEG<1.5/-1.265	1636176_at	eIF-2beta	Eukaryotic initiation factor 2beta	chr3L:12518190-12519837 (-) // 100.0 //	0000022 // mitotic spindle elongation // inferred from mutant phenotype /// 0001677 // formation of translation initiation ternary complex // non-traceable author statement /// 0006412 // translation // inferred from electronic annotation /// 0006413 // translational initiation // inferred from electronic annotation /// 0006413 // translational initiation // inferred from sequence or structural s…	0005829 // cytosol // inferred from sequence or structural similarity /// 0005850 // eukaryotic translation initiation factor 2 complex // inferred from sequence or structural similarity /// 0005850 // eukaryotic translation initiation factor 2 complex // non-traceable author statement	0000049 // tRNA binding // non-traceable author statement /// 0003743 // translation initiation factor activity // inferred from electronic annotation /// 0003743 // translation initiation factor activity // inferred from sequence or structural similarity /// 0003743 // translation initiation factor activity // non-traceable author statement /// 0005515 // protein binding // inferred from physica…
Group 2 vs 1	1633251_at	CG15829	FBgn0035743	12333.1	7692.89	-1.60318	0	459	DEG	Group 3 vs 1	1633251_at	12333.1	9820.56	-1.25584	0	627	DEG_FC<1.5/-1.223	Group 3 vs 2	1633251_at	7692.89	9820.56	1.27658	0	661	DEG<1.5/-1.207	1633251_at	CG15829	---	chr3L:7122051-7122374 (+) // 100.0 //	0042049 // cellular acyl-CoA homeostasis // inferred from sequence or structural similarity	---	0000062 // acyl-CoA binding // inferred from sequence or structural similarity /// 0000062 // acyl-CoA binding // inferred from electronic annotation /// 0004857 // enzyme inhibitor activity // inferred from sequence or structural similarity /// 0005488 // binding // inferred from electronic annotation /// 0050809 // diazepam binding // inferred from sequence or structural similarity
Group 2 vs 1	1641066_s_at	fbp	FBgn0032820	3170.37	1977.69	-1.60307	0	460	DEG	Group 3 vs 1	1641066_s_at	3170.37	2253.04	-1.40715	0	467	DEG_FC<1.5/-1.63	Group 3 vs 2	1641066_s_at	1977.69	2253.04	1.13923	0.00181773		nonDEG	1641066_s_at	fbp	fructose-1,6-bisphosphatase	chr2L:19761578-19764134 (-) // 100.0 //	0005975 // carbohydrate metabolic process // inferred from electronic annotation	---	0016787 // hydrolase activity // inferred from electronic annotation /// 0042132 // fructose 1,6-bisphosphate 1-phosphatase activity // inferred from sequence or structural similarity /// 0042132 // fructose 1,6-bisphosphate 1-phosphatase activity // non-traceable author statement /// 0042132 // fructose 1,6-bisphosphate 1-phosphatase activity // inferred from electronic annotation /// 0042578 //…
Group 2 vs 1	1625278_s_at	CG31004	FBgn0051004	1563.33	977.838	-1.59876	0	461	DEG	Group 3 vs 1	1625278_s_at	1563.33	938.641	-1.66552	0	352	DEG	Group 3 vs 2	1625278_s_at	977.838	938.641	-1.04176	0.15525		nonDEG	1625278_s_at	CG31004	---	chr3R:27005304-27021484 (-) // 100.0 //	0007160 // cell-matrix adhesion // inferred from electronic annotation	---	---
Group 2 vs 1	1626566_at	CG12262	FBgn0035811	2164.9	1354.5	-1.5983	0	462	DEG	Group 3 vs 1	1626566_at	2164.9	2402.04	1.10954	0.0326277		nonDEG	Group 3 vs 2	1626566_at	1354.5	2402.04	1.77338	0	318	DEG	1626566_at	CG12262	---	chr3L:7712460-7714585 (+) // 100.0 //	0006629 // lipid metabolic process // inferred from electronic annotation /// 0006631 // fatty acid metabolic process // inferred from electronic annotation /// 0006635 // fatty acid beta-oxidation // inferred from sequence or structural similarity /// 0008152 // metabolic process // inferred from electronic annotation /// 0055114 // oxidation reduction // inferred from electronic annotation	0005739 // mitochondrion // inferred from sequence or structural similarity /// 0005739 // mitochondrion // inferred from electronic annotation /// 0005759 // mitochondrial matrix // inferred from sequence or structural similarity /// 0005759 // mitochondrial matrix // inferred from electronic annotation /// 0005811 // lipid particle // inferred from direct assay	0003995 // acyl-CoA dehydrogenase activity // inferred from sequence or structural similarity /// 0003995 // acyl-CoA dehydrogenase activity // inferred from electronic annotation /// 0005515 // protein binding // inferred from physical interaction /// 0009055 // electron carrier activity // inferred from electronic annotation /// 0016491 // oxidoreductase activity // inferred from electronic ann…
Group 2 vs 1	1631558_at	Cpr65Ax1 /// Cpr65Ax2	FBgn0042118 /// FBgn0086900	9060.14	14480.5	1.59827	0	463	DEG	Group 3 vs 1	1631558_at	9060.14	12869.8	1.42049	0	459	DEG_FC<1.5/-1.55	Group 3 vs 2	1631558_at	14480.5	12869.8	-1.12515	0		nonDEG	1631558_at	Cpr65Ax1 /// Cpr65Ax2	Cuticular protein 65Ax1 /// CG18777	chr3L:6143499-6143952 (-) // 100.0 // /// chr3L:6140628-6141081 (-) // 100.0 //	---	---	0005214 // structural constituent of chitin-based cuticle // inferred from sequence or structural similarity /// 0005515 // protein binding // inferred from physical interaction /// 0042302 // structural constituent of cuticle // inferred from electronic annotation
Group 2 vs 1	AFFX-Dros-ACTIN_3_at	---	---	3135.77	1963.86	-1.59674	0	464	DEG	Group 3 vs 1	AFFX-Dros-ACTIN_3_at	3135.77	3298.68	1.05195	0.0560339		nonDEG	Group 3 vs 2	AFFX-Dros-ACTIN_3_at	1963.86	3298.68	1.67969	0	352	DEG	AFFX-Dros-ACTIN_3_at	---	---	---	0000910 // cytokinesis // inferred from mutant phenotype /// 0006911 // phagocytosis, engulfment // inferred from mutant phenotype	0005737 // cytoplasm // inferred from electronic annotation /// 0005856 // cytoskeleton // inferred from electronic annotation	0000166 // nucleotide binding // inferred from electronic annotation /// 0005198 // structural molecule activity // inferred from electronic annotation /// 0005515 // protein binding // inferred from electronic annotation /// 0005515 // protein binding // inferred from physical interaction /// 0005524 // ATP binding // inferred from electronic annotation
Group 2 vs 1	1632695_at	CG18585	FBgn0031929	1266.03	2017.41	1.5935	0	465	DEG	Group 3 vs 1	1632695_at	1266.03	1740.07	1.37444	0	494	DEG_FC<1.5/-1.90	Group 3 vs 2	1632695_at	2017.41	1740.07	-1.15939	0.01149		nonDEG	1632695_at	CG18585	---	chr2L:7689365-7691057 (-) // 100.0 //	0006508 // proteolysis // inferred from electronic annotation	---	0004180 // carboxypeptidase activity // inferred from electronic annotation /// 0008270 // zinc ion binding // inferred from electronic annotation /// 0016787 // hydrolase activity // inferred from electronic annotation
Group 2 vs 1	1628984_s_at	HmgZ	FBgn0010228	1649.41	2624.9	1.59142	0	466	DEG	Group 3 vs 1	1628984_s_at	1649.41	2605.89	1.57989	0	377	DEG	Group 3 vs 2	1628984_s_at	2624.9	2605.89	-1.0073			nonDEG	1628984_s_at	HmgZ	HMG protein Z	chr2R:17585055-17591993 (-) // 100.0 //	0006355 // regulation of transcription, DNA-dependent // inferred from electronic annotation	0005634 // nucleus // non-traceable author statement /// 0005634 // nucleus // inferred from electronic annotation /// 0005694 // chromosome // inferred from electronic annotation	0003677 // DNA binding // inferred from electronic annotation /// 0003677 // DNA binding // non-traceable author statement
Group 2 vs 1	1630109_at	CG8628 /// Hsc70-4	FBgn0035744	7629.5	4797.72	-1.59023	0	467	DEG	Group 3 vs 1	1630109_at	7629.5	2647.57	-2.8817	0	172	DEG	Group 3 vs 2	1630109_at	4797.72	2647.57	-1.81212	0	305	DEG	1630109_at	CG8628 /// Hsc70-4	anon-SAGE:Wang-073 /// heat-shock protein 70	chr3L:7124101-7124489 (+) // 100.0 //	0001700 // embryonic development via the syncytial blastoderm // inferred from mutant phenotype /// 0006457 // protein folding // inferred from sequence similarity /// 0006457 // protein folding // non-traceable author statement /// 0006950 // response to stress // inferred from electronic annotation /// 0007269 // neurotransmitter secretion // inferred from genetic interaction /// 0007399 // ner…	0005634 // nucleus // inferred from electronic annotation /// 0005737 // cytoplasm // inferred from electronic annotation /// 0005739 // mitochondrion // inferred from sequence similarity /// 0005811 // lipid particle // inferred from direct assay	0000062 // acyl-CoA binding // inferred from electronic annotation /// 0000166 // nucleotide binding // inferred from electronic annotation /// 0005488 // binding // inferred from electronic annotation /// 0005515 // protein binding // inferred from physical interaction /// 0005524 // ATP binding // inferred from electronic annotation /// 0016887 // ATPase activity // non-traceable author stateme…
Group 2 vs 1	1625885_at	betaTub97EF	FBgn0003890	1599.3	2542.8	1.58995	0	468	DEG	Group 3 vs 1	1625885_at	1599.3	1991.03	1.24494	0.00306343	1511	DEG_FC<1.5/-1.874	Group 3 vs 2	1625885_at	2542.8	1991.03	-1.27713	0.00215993	1001	DEG<1.5/-1.601	1625885_at	betaTub97EF	beta-Tubulin	chr3R:23792729-23814089 (-) // 100.0 //	0007017 // microtubule-based process // inferred from electronic annotation /// 0007018 // microtubule-based movement // inferred from electronic annotation /// 0051258 // protein polymerization // inferred from electronic annotation	0005874 // microtubule // inferred from electronic annotation /// 0005874 // microtubule // inferred from sequence or structural similarity /// 0043234 // protein complex // inferred from electronic annotation	0000166 // nucleotide binding // inferred from electronic annotation /// 0003924 // GTPase activity // inferred from electronic annotation /// 0005198 // structural molecule activity // inferred from electronic annotation /// 0005200 // structural constituent of cytoskeleton // inferred from sequence or structural similarity /// 0005525 // GTP binding // inferred from electronic annotation
Group 2 vs 1	1630600_at	Fst /// Scm	FBgn0037724	4828.27	3039.6	-1.58846	0	469	DEG	Group 3 vs 1	1630600_at	4828.27	2050.25	-2.35497	0	215	DEG	Group 3 vs 2	1630600_at	3039.6	2050.25	-1.48255	0	470	DEG<1.5/-1.16	1630600_at	Fst /// Scm	Frost /// Sex combs on midleg	chr3R:5470850-5471874 (-) // 100.0 //	0009409 // response to cold // inferred from expression pattern /// 0009409 // response to cold // non-traceable author statement /// 0016458 // gene silencing // inferred from genetic interaction /// 0016458 // gene silencing // inferred from mutant phenotype /// 0022008 // neurogenesis // inferred from mutant phenotype /// 0030708 // germarium-derived female germ-line cyst encapsulation // infe…	0005634 // nucleus // non-traceable author statement /// 0005634 // nucleus // inferred from direct assay /// 0035102 // PRC1 complex // traceable author statement	0003704 // specific RNA polymerase II transcription factor activity // non-traceable author statement /// 0005515 // protein binding // inferred from physical interaction /// 0008270 // zinc ion binding // inferred from electronic annotation
Group 2 vs 1	1629434_at	CG9380	FBgn0035094	2310.63	1459.9	-1.58274	0	470	DEG	Group 3 vs 1	1629434_at	2310.63	1237.94	-1.86652	0	289	DEG	Group 3 vs 2	1629434_at	1459.9	1237.94	-1.1793	0.0256973		nonDEG	1629434_at	CG9380	---	chr2R:21072648-21076360 (-) // 100.0 //	---	---	---
Group 2 vs 1	1625616_at	CG14566	FBgn0037127	1401.85	2215.56	1.58046	0	471	DEG	Group 3 vs 1	1625616_at	1401.85	802.726	-1.74636	0	322	DEG	Group 3 vs 2	1625616_at	2215.56	802.726	-2.76005	0	147	DEG	1625616_at	CG14566	---	chr3L:21732865-21733366 (-) // 100.0 //	---	---	---
Group 2 vs 1	1625780_a_at	CG9812	FBgn0034860	1194.55	756.663	-1.5787	0	472	DEG	Group 3 vs 1	1625780_a_at	1194.55	842.969	-1.41707	0	460	DEG_FC<1.5/-1.56	Group 3 vs 2	1625780_a_at	756.663	842.969	1.11406	0.0415876		nonDEG	1625780_a_at	CG9812	---	chr2R:19299858-19307207 (-) // 100.0 //	---	---	---
Group 2 vs 1	1635331_at	Cpr49Af	FBgn0033729	5139.86	3260.23	-1.57653	0	473	DEG	Group 3 vs 1	1635331_at	5139.86	4112.86	-1.24971	0	635	DEG_FC<1.5/-1.231	Group 3 vs 2	1635331_at	3260.23	4112.86	1.26152	0	683	DEG<1.5/-1.229	1635331_at	Cpr49Af	CG8510	chr2R:8293509-8293948 (+) // 100.0 //	---	---	0005214 // structural constituent of chitin-based cuticle // inferred from sequence or structural similarity /// 0042302 // structural constituent of cuticle // inferred from electronic annotation
Group 2 vs 1	1631167_at	CG5023	FBgn0038774	2293.53	1456.1	-1.57511	0	474	DEG	Group 3 vs 1	1631167_at	2293.53	2338.55	1.01963	0.139394		nonDEG	Group 3 vs 2	1631167_at	1456.1	2338.55	1.60603	0	392	DEG	1631167_at	CG5023	---	chr3R:15995157-16000597 (+) // 100.0 //	0031032 // actomyosin structure organization and biogenesis // inferred from electronic annotation	---	0003779 // actin binding // inferred from sequence or structural similarity /// 0003779 // actin binding // inferred from electronic annotation
Group 2 vs 1	1629009_at	Cyp28a5	FBgn0028940	3071.57	4833.12	1.5735	0	475	DEG	Group 3 vs 1	1629009_at	3071.57	1258.07	-2.44148	0	207	DEG	Group 3 vs 2	1629009_at	4833.12	1258.07	-3.84169	0	97	DEG	1629009_at	Cyp28a5	Cyp28a5	chr2L:13977302-13979569 (+) // 99.77 //	0055114 // oxidation reduction // inferred from electronic annotation	0005783 // endoplasmic reticulum // inferred from electronic annotation /// 0005789 // endoplasmic reticulum membrane // inferred from electronic annotation /// 0005792 // microsome // non-traceable author statement /// 0005792 // microsome // inferred from electronic annotation /// 0016020 // membrane // non-traceable author statement /// 0016020 // membrane // inferred from electronic annotation	0004497 // monooxygenase activity // inferred from electronic annotation /// 0005506 // iron ion binding // inferred from electronic annotation /// 0009055 // electron carrier activity // inferred from electronic annotation /// 0009055 // electron carrier activity // inferred from sequence or structural similarity /// 0009055 // electron carrier activity // non-traceable author statement /// 0016…
Group 2 vs 1	1636348_s_at	Act87E	FBgn0000046	6518.07	4147.46	-1.57158	0	476	DEG	Group 3 vs 1	1636348_s_at	6518.07	6834.25	1.04851	0.0066011		nonDEG	Group 3 vs 2	1636348_s_at	4147.46	6834.25	1.64782	0	369	DEG	1636348_s_at	Act87E	Actin 87E	chr3R:9251706-9253810 (+) // 100.0 //	0007010 // cytoskeleton organization and biogenesis // inferred from sequence or structural similarity	0005737 // cytoplasm // inferred from electronic annotation /// 0005811 // lipid particle // inferred from direct assay /// 0005856 // cytoskeleton // inferred from electronic annotation /// 0005884 // actin filament // inferred from sequence or structural similarity /// 0005884 // actin filament // non-traceable author statement	0000166 // nucleotide binding // inferred from electronic annotation /// 0005198 // structural molecule activity // inferred from electronic annotation /// 0005200 // structural constituent of cytoskeleton // inferred from sequence or structural similarity /// 0005515 // protein binding // inferred from electronic annotation /// 0005515 // protein binding // inferred from physical interaction ///…
Group 2 vs 1	1625414_at	ifc	FBgn0001941	2101.35	1338.01	-1.57051	0	477	DEG	Group 3 vs 1	1625414_at	2101.35	1676.57	-1.25336	0	630	DEG_FC<1.5/-1.226	Group 3 vs 2	1625414_at	1338.01	1676.57	1.25303	0	690	DEG<1.5/-1.236	1625414_at	ifc	degenerative spermatocyte	chr2L:5986323-5988858 (+) // 100.0 //	0006508 // proteolysis // inferred from electronic annotation /// 0006629 // lipid metabolic process // inferred from electronic annotation /// 0007283 // spermatogenesis // inferred from mutant phenotype /// 0007283 // spermatogenesis // traceable author statement /// 0055114 // oxidation reduction // inferred from electronic annotation	0005739 // mitochondrion // traceable author statement /// 0005886 // plasma membrane // inferred from sequence or structural similarity /// 0005886 // plasma membrane // non-traceable author statement	0004768 // stearoyl-CoA 9-desaturase activity // inferred from sequence or structural similarity /// 0004768 // stearoyl-CoA 9-desaturase activity // inferred from electronic annotation /// 0008237 // metallopeptidase activity // inferred from electronic annotation /// 0008270 // zinc ion binding // inferred from electronic annotation /// 0016491 // oxidoreductase activity // inferred from electr…
Group 2 vs 1	1634374_at	CG33138 /// DsecCG33138	FBgn0053138	1728.2	1102.71	-1.56723	0	478	DEG	Group 3 vs 1	1634374_at	1728.2	1116.13	-1.54839	0	390	DEG	Group 3 vs 2	1634374_at	1102.71	1116.13	1.01217			nonDEG	1634374_at	CG33138 /// DsecCG33138	--- /// ---	chr2R:9058905-9062301 (+) // 99.83 //	0005975 // carbohydrate metabolic process // inferred from electronic annotation	---	0003824 // catalytic activity // inferred from electronic annotation /// 0003844 // 1,4-alpha-glucan branching enzyme activity // inferred from sequence or structural similarity /// 0003844 // 1,4-alpha-glucan branching enzyme activity // inferred from electronic annotation /// 0004553 // hydrolase activity, hydrolyzing O-glycosyl compounds // inferred from electronic annotation /// 0016740 // tr…
Group 2 vs 1	1628235_at	CG7203	FBgn0031942	2235.67	3494.75	1.56317	0	479	DEG	Group 3 vs 1	1628235_at	2235.67	1764.26	-1.2672	0.00432419	1562	DEG_FC<1.5/-1.871	Group 3 vs 2	1628235_at	3494.75	1764.26	-1.98086	0	248	DEG	1628235_at	CG7203	---	chr2L:7752167-7753160 (-) // 100.0 //	---	---	0005515 // protein binding // inferred from physical interaction
Group 2 vs 1	1630643_at	ScpX	FBgn0015808	1550.86	998.484	-1.55321	0	480	DEG	Group 3 vs 1	1630643_at	1550.86	2056.81	1.32624	0	553	DEG_FC<1.5/-1.149	Group 3 vs 2	1630643_at	998.484	2056.81	2.05993	0	234	DEG	1630643_at	ScpX	sterol carrier protein X-related thiolase	chr2L:18831215-18833639 (+) // 100.0 // /// chr2L:18829097-18830462 (-) // 58.06 //	0008152 // metabolic process // inferred from electronic annotation /// 0015914 // phospholipid transport // inferred from sequence or structural similarity	0005737 // cytoplasm // inferred from sequence or structural similarity /// 0005739 // mitochondrion // inferred from sequence or structural similarity /// 0005777 // peroxisome // inferred from sequence or structural similarity /// 0005811 // lipid particle // inferred from direct assay	0003824 // catalytic activity // inferred from electronic annotation /// 0004770 // sterol carrier protein X-related thiolase activity // inferred from sequence or structural similarity /// 0004770 // sterol carrier protein X-related thiolase activity // non-traceable author statement /// 0005498 // sterol carrier activity // inferred from sequence or structural similarity /// 0005498 // sterol c…
Group 2 vs 1	1628633_at	Pig1	FBgn0003086	2014.81	1297.55	-1.55278	0	481	DEG	Group 3 vs 1	1628633_at	2014.81	1295.56	-1.55516	0	389	DEG	Group 3 vs 2	1628633_at	1297.55	1295.56	-1.00153			nonDEG	1628633_at	Pig1	gland specific gene	chrX:3142632-3143322 (-) // 99.28 //	---	---	---
Group 2 vs 1	1630051_at	Tsp42Ec	FBgn0033124	1378.53	892.616	-1.54437	0	482	DEG	Group 3 vs 1	1630051_at	1378.53	1397.22	1.01355	0.122623		nonDEG	Group 3 vs 2	1630051_at	892.616	1397.22	1.56531	0	412	DEG	1630051_at	Tsp42Ec	tetraspanin 42E	chr2R:2893951-2896127 (+) // 100.0 //	---	0016020 // membrane // inferred from electronic annotation /// 0016021 // integral to membrane // inferred from electronic annotation /// 0016021 // integral to membrane // inferred from sequence or structural similarity	---
Group 2 vs 1	1637444_s_at	pug	FBgn0020385	2126.63	1377.49	-1.54384	0	483	DEG	Group 3 vs 1	1637444_s_at	2126.63	2200.09	1.03454	0.148574		nonDEG	Group 3 vs 2	1637444_s_at	1377.49	2200.09	1.59716	0	400	DEG	1637444_s_at	pug	Pugilist	chr3R:6522239-6529011 (+) // 100.0 //	0000105 // histidine biosynthetic process // inferred from electronic annotation /// 0006164 // purine nucleotide biosynthetic process // inferred from electronic annotation /// 0006730 // one-carbon compound metabolic process // inferred from electronic annotation /// 0008152 // metabolic process // inferred from electronic annotation /// 0008652 // amino acid biosynthetic process // inferred fr…	0005737 // cytoplasm // inferred from direct assay /// 0005737 // cytoplasm // inferred from electronic annotation /// 0005811 // lipid particle // inferred from direct assay	0000166 // nucleotide binding // inferred from electronic annotation /// 0003824 // catalytic activity // inferred from electronic annotation /// 0004329 // formate-tetrahydrofolate ligase activity // inferred from sequence or structural similarity /// 0004329 // formate-tetrahydrofolate ligase activity // inferred from electronic annotation /// 0004329 // formate-tetrahydrofolate ligase activity…
Group 2 vs 1	1626443_at	CG13364	FBgn0026879	1582.66	2433.81	1.53779	0	484	DEG	Group 3 vs 1	1626443_at	1582.66	2146.84	1.35647	0	516	DEG_FC<1.5/-1.112	Group 3 vs 2	1626443_at	2433.81	2146.84	-1.13367	0.0152645		nonDEG	1626443_at	CG13364	---	chrX:518790-519234 (-) // 100.0 //	---	---	---
Group 2 vs 1	1634739_a_at	Pfk	FBgn0003071	2282.83	1486.06	-1.53617	0	485	DEG	Group 3 vs 1	1634739_a_at	2282.83	1853.49	-1.23164	0	653	DEG_FC<1.5/-1.249	Group 3 vs 2	1634739_a_at	1486.06	1853.49	1.24725	0.00106706	841	DEG<1.5/-1.747	1634739_a_at	Pfk	6-phosphofructokinase	chr2R:5997244-6004696 (+) // 100.0 //	0006096 // glycolysis // inferred from electronic annotation /// 0006096 // glycolysis // non-traceable author statement	0005737 // cytoplasm // inferred from electronic annotation /// 0005945 // 6-phosphofructokinase complex // inferred from electronic annotation	0000166 // nucleotide binding // inferred from electronic annotation /// 0003824 // catalytic activity // inferred from electronic annotation /// 0003872 // 6-phosphofructokinase activity // inferred from sequence or structural similarity /// 0003872 // 6-phosphofructokinase activity // inferred from electronic annotation /// 0005524 // ATP binding // inferred from electronic annotation /// 00163…
Group 2 vs 1	1630598_at	CG18179	FBgn0036023	3203.64	2091.57	-1.53169	0	486	DEG	Group 3 vs 1	1630598_at	3203.64	5549.18	1.73215	0	329	DEG	Group 3 vs 2	1630598_at	2091.57	5549.18	2.65312	0	154	DEG	1630598_at	CG18179	---	chr3L:9632372-9633246 (+) // 100.0 //	0006508 // proteolysis // inferred from electronic annotation /// 0006508 // proteolysis // non-traceable author statement	---	0003824 // catalytic activity // inferred from electronic annotation /// 0004252 // serine-type endopeptidase activity // inferred from electronic annotation /// 0016787 // hydrolase activity // inferred from electronic annotation
Group 2 vs 1	1630670_at	CG1368	FBgn0030539	3229.44	4943.87	1.53088	0	487	DEG	Group 3 vs 1	1630670_at	3229.44	3754.72	1.16265	0		nonDEG	Group 3 vs 2	1630670_at	4943.87	3754.72	-1.31671	0	617	DEG<1.5/-1.163	1630670_at	CG1368	---	chrX:14068793-14069703 (+) // 100.0 //	---	---	0005213 // structural constituent of chorion // inferred from sequence or structural similarity /// 0005515 // protein binding // inferred from physical interaction
Group 2 vs 1	1635769_at	CG8773	FBgn0038135	1864.5	1223.02	-1.52451	0	488	DEG	Group 3 vs 1	1635769_at	1864.5	883.275	-2.1109	0	246	DEG	Group 3 vs 2	1635769_at	1223.02	883.275	-1.38464	0.00291742	1083	DEG<1.5/-1.245	1635769_at	CG8773	---	chr3R:9120471-9124010 (+) // 100.0 //	0006508 // proteolysis // inferred from electronic annotation	---	0004177 // aminopeptidase activity // inferred from electronic annotation /// 0005515 // protein binding // inferred from physical interaction /// 0008233 // peptidase activity // inferred from electronic annotation /// 0008237 // metallopeptidase activity // inferred from electronic annotation /// 0008270 // zinc ion binding // inferred from electronic annotation /// 0016787 // hydrolase activit…
Group 2 vs 1	1638937_at	Hydr2	FBgn0014906	1597.75	1048.3	-1.52413	0	489	DEG	Group 3 vs 1	1638937_at	1597.75	893.461	-1.78827	0	304	DEG	Group 3 vs 2	1638937_at	1048.3	893.461	-1.17331	0.0211966		nonDEG	1638937_at	Hydr2	alpha/beta hydrolase2	chr2L:3163646-3168999 (+) // 100.0 //	0006629 // lipid metabolic process // inferred by curator	---	0004091 // carboxylesterase activity // inferred from electronic annotation /// 0005515 // protein binding // inferred from physical interaction /// 0016298 // lipase activity // non-traceable author statement /// 0016787 // hydrolase activity // inferred from electronic annotation
Group 2 vs 1	1625294_at	ng3	FBgn0010295	4611.98	7025.13	1.52323	0	490	DEG	Group 3 vs 1	1625294_at	4611.98	6504.41	1.41033	0	465	DEG_FC<1.5/-1.61	Group 3 vs 2	1625294_at	7025.13	6504.41	-1.08006	0.00419664		nonDEG	1625294_at	ng3	new glue 3	chrX:3135523-3136117 (-) // 100.0 //	0007594 // puparial adhesion // non-traceable author statement	0005576 // extracellular region // non-traceable author statement /// 0005576 // extracellular region // inferred from electronic annotation	0005198 // structural molecule activity // non-traceable author statement
Group 2 vs 1	1637634_at	CG10953	FBgn0034204	4466.07	6802.47	1.52315	0	491	DEG	Group 3 vs 1	1637634_at	4466.07	4969.18	1.11265	0.00113		nonDEG	Group 3 vs 2	1637634_at	6802.47	4969.18	-1.36893	0	549	DEG<1.5/-1.95	1637634_at	CG10953	---	chr2R:13052965-13054006 (-) // 100.0 //	---	---	---
Group 2 vs 1	1629752_at	CG5525	FBgn0032444	1795.47	2727.13	1.5189	0	492	DEG	Group 3 vs 1	1629752_at	1795.47	2148.08	1.19639	0.00097224		nonDEG	Group 3 vs 2	1629752_at	2727.13	2148.08	-1.26957	0	670	DEG<1.5/-1.216	1629752_at	CG5525	---	chr2L:12690324-12692937 (-) // 100.0 //	0006457 // protein folding // inferred from electronic annotation /// 0007052 // mitotic spindle organization and biogenesis // inferred from mutant phenotype /// 0044267 // cellular protein metabolic process // inferred from electronic annotation	0005737 // cytoplasm // inferred from electronic annotation /// 0005811 // lipid particle // inferred from direct assay /// 0005832 // chaperonin-containing T-complex // inferred from sequence or structural similarity	0000166 // nucleotide binding // inferred from electronic annotation /// 0005515 // protein binding // inferred from electronic annotation /// 0005515 // protein binding // inferred from physical interaction /// 0005524 // ATP binding // inferred from electronic annotation /// 0016787 // hydrolase activity // inferred from electronic annotation /// 0042623 // ATPase activity, coupled // inferred …
Group 2 vs 1	1631227_at	CG5793	FBgn0038858	2573.34	1699.07	-1.51455	0	493	DEG	Group 3 vs 1	1631227_at	2573.34	2890.83	1.12338	0.00575251		nonDEG	Group 3 vs 2	1631227_at	1699.07	2890.83	1.70142	0	340	DEG	1631227_at	CG5793	---	chr3R:16953445-16954630 (+) // 100.0 //	0008152 // metabolic process // inferred from electronic annotation	---	0003824 // catalytic activity // inferred from electronic annotation /// 0005515 // protein binding // inferred from physical interaction
Group 2 vs 1	1624471_s_at	Act42A	FBgn0000043	4658.65	3078	-1.51354	0	494	DEG	Group 3 vs 1	1624471_s_at	4658.65	4890.66	1.0498	0.0146188		nonDEG	Group 3 vs 2	1624471_s_at	3078	4890.66	1.58891	0	402	DEG	1624471_s_at	Act42A	actin	chr2R:1901414-1903190 (-) // 100.0 //	0000910 // cytokinesis // inferred from mutant phenotype /// 0006911 // phagocytosis, engulfment // inferred from mutant phenotype /// 0007010 // cytoskeleton organization and biogenesis // inferred from sequence or structural similarity	0005737 // cytoplasm // inferred from electronic annotation /// 0005856 // cytoskeleton // inferred from electronic annotation /// 0005884 // actin filament // inferred from sequence or structural similarity /// 0005884 // actin filament // non-traceable author statement	0000166 // nucleotide binding // inferred from electronic annotation /// 0005198 // structural molecule activity // inferred from electronic annotation /// 0005200 // structural constituent of cytoskeleton // inferred from sequence or structural similarity /// 0005515 // protein binding // inferred from electronic annotation /// 0005515 // protein binding // inferred from physical interaction ///…
Group 2 vs 1	1627662_at	Ugt35a	FBgn0026315	1677.25	1108.29	-1.51337	0	495	DEG	Group 3 vs 1	1627662_at	1677.25	1417.47	-1.18327	0.00155558		nonDEG	Group 3 vs 2	1627662_at	1108.29	1417.47	1.27898	0	659	DEG<1.5/-1.205	1627662_at	Ugt35a	UDP-glycosyltransferase 35a	chr3R:6996520-6998386 (-) // 100.0 //	0008152 // metabolic process // inferred from electronic annotation	---	0008194 // UDP-glycosyltransferase activity // non-traceable author statement /// 0015020 // glucuronosyltransferase activity // inferred from sequence or structural similarity /// 0015020 // glucuronosyltransferase activity // inferred from electronic annotation /// 0016740 // transferase activity // inferred from electronic annotation /// 0016757 // transferase activity, transferring glycosyl g…
Group 2 vs 1	1628608_at	CG17475	FBgn0038481	2139.16	1414.27	-1.51255	0	496	DEG	Group 3 vs 1	1628608_at	2139.16	590.955	-3.61983	0	136	DEG	Group 3 vs 2	1628608_at	1414.27	590.955	-2.3932	0	176	DEG	1628608_at	CG17475	---	chr3R:12955133-12956141 (-) // 99.6 //	0006508 // proteolysis // inferred from electronic annotation /// 0006508 // proteolysis // non-traceable author statement	---	0003824 // catalytic activity // inferred from electronic annotation /// 0004252 // serine-type endopeptidase activity // inferred from electronic annotation /// 0004252 // serine-type endopeptidase activity // non-traceable author statement /// 0005515 // protein binding // inferred from physical interaction /// 0008233 // peptidase activity // inferred from electronic annotation /// 0016787 // …
Group 2 vs 1	1634219_a_at	Jafrac1	FBgn0040309	5309.45	8023.84	1.51124	0	497	DEG	Group 3 vs 1	1634219_a_at	5309.45	5409.01	1.01875	0.0429463		nonDEG	Group 3 vs 2	1634219_a_at	8023.84	5409.01	-1.48342	0	469	DEG<1.5/-1.15	1634219_a_at	Jafrac1	thioredoxin peroxidase	chrX:13223880-13226029 (+) // 100.0 //	0045454 // cell redox homeostasis // inferred from direct assay /// 0055114 // oxidation reduction // inferred from electronic annotation	0005737 // cytoplasm // inferred from electronic annotation /// 0005829 // cytosol // inferred from direct assay /// 0005829 // cytosol // non-traceable author statement	0004601 // peroxidase activity // non-traceable author statement /// 0004601 // peroxidase activity // inferred from electronic annotation /// 0004602 // glutathione peroxidase activity // inferred from direct assay /// 0005515 // protein binding // inferred from physical interaction /// 0008379 // thioredoxin peroxidase activity // inferred from direct assay /// 0008379 // thioredoxin peroxidase…
Group 2 vs 1	AFFX-Dros-ACTIN_5_at	---	---	1648.83	1093.61	-1.5077	0	498	DEG	Group 3 vs 1	AFFX-Dros-ACTIN_5_at	1648.83	1683.24	1.02087	0.154384		nonDEG	Group 3 vs 2	AFFX-Dros-ACTIN_5_at	1093.61	1683.24	1.53916	0	425	DEG	AFFX-Dros-ACTIN_5_at	---	---	---	0000910 // cytokinesis // inferred from mutant phenotype /// 0006911 // phagocytosis, engulfment // inferred from mutant phenotype	0005737 // cytoplasm // inferred from electronic annotation /// 0005856 // cytoskeleton // inferred from electronic annotation	0000166 // nucleotide binding // inferred from electronic annotation /// 0005198 // structural molecule activity // inferred from electronic annotation /// 0005515 // protein binding // inferred from electronic annotation /// 0005515 // protein binding // inferred from physical interaction /// 0005524 // ATP binding // inferred from electronic annotation
Group 2 vs 1	1634207_at	CG16799 /// DmirCG16799 /// DpseGA14157	FBgn0034538	1836.1	1220.39	-1.50452	0	499	DEG	Group 3 vs 1	1634207_at	1836.1	1442.6	-1.27277	0	607	DEG_FC<1.5/-1.203	Group 3 vs 2	1634207_at	1220.39	1442.6	1.18208	0.00260542		nonDEG	1634207_at	CG16799 /// DmirCG16799 /// DpseGA14157	--- /// --- /// GA14157	chr2R:16540719-16542596 (-) // 100.0 //	0006952 // defense response // inferred from sequence or structural similarity /// 0008152 // metabolic process // inferred from electronic annotation /// 0019730 // antimicrobial humoral response // non-traceable author statement	0005576 // extracellular region // inferred from electronic annotation	0003796 // lysozyme activity // non-traceable author statement /// 0003796 // lysozyme activity // inferred from electronic annotation /// 0016787 // hydrolase activity // inferred from electronic annotation /// 0016798 // hydrolase activity, acting on glycosyl bonds // inferred from electronic annotation
Group 2 vs 1	1622984_at	Sod2	FBgn0010213	1506.03	2265.48	1.50427	0	500	DEG	Group 3 vs 1	1622984_at	1506.03	1964.07	1.30413	0	571	DEG_FC<1.5/-1.167	Group 3 vs 2	1622984_at	2265.48	1964.07	-1.15346	0.00713813		nonDEG	1622984_at	Sod2	mitochodnrial SOD	chr2R:12660420-12661413 (-) // 100.0 //	0006801 // superoxide metabolic process // non-traceable author statement /// 0006801 // superoxide metabolic process // inferred from electronic annotation /// 0008340 // determination of adult life span // inferred from mutant phenotype /// 0008340 // determination of adult life span // traceable author statement /// 0019430 // removal of superoxide radicals // inferred from sequence or structu…	0005739 // mitochondrion // inferred from electronic annotation /// 0005759 // mitochondrial matrix // inferred from sequence or structural similarity /// 0005759 // mitochondrial matrix // non-traceable author statement /// 0005759 // mitochondrial matrix // inferred from electronic annotation	0004784 // superoxide dismutase activity // inferred from sequence or structural similarity /// 0004784 // superoxide dismutase activity // non-traceable author statement /// 0004784 // superoxide dismutase activity // inferred from electronic annotation /// 0016209 // antioxidant activity // non-traceable author statement /// 0016491 // oxidoreductase activity // inferred from electronic annotat…
Group 2 vs 1	1624945_a_at	CG10910	FBgn0034289	11848.6	7883.89	-1.50289	0	501	DEG	Group 3 vs 1	1624945_a_at	11848.6	6455.83	-1.83533	0	293	DEG	Group 3 vs 2	1624945_a_at	7883.89	6455.83	-1.2212	0	746	DEG<1.5/-1.292	1624945_a_at	CG10910	---	chr2R:13907753-13909911 (+) // 100.0 //	---	---	---
Group 2 vs 1	1627927_at	CG8443	FBgn0034087	871.761	1539.35	1.76579	0.00110448	766	DEG	Group 3 vs 1	1627927_at	871.761	931.928	1.06902	0.162971		nonDEG	Group 3 vs 2	1627927_at	1539.35	931.928	-1.65179	0	366	DEG	1627927_at	CG8443	clueless	chr2R:12074089-12081754 (+) // 100.0 //	0006413 // translational initiation // inferred from sequence or structural similarity	0005852 // eukaryotic translation initiation factor 3 complex // inferred from sequence or structural similarity	0003743 // translation initiation factor activity // inferred from sequence or structural similarity
Group 2 vs 1	1625613_at	CG11899 /// DsimGD21426	FBgn0014427	399.214	1020.75	2.5569	0.00110638	767	DEG	Group 3 vs 1	1625613_at	399.214	417.371	1.04548			nonDEG	Group 3 vs 2	1625613_at	1020.75	417.371	-2.44566	0	170	DEG	1625613_at	CG11899 /// DsimGD21426	--- /// CG11899	chr3R:25026173-25027492 (+) // 100.0 //	0006564 // L-serine biosynthetic process // inferred from electronic annotation /// 0006564 // L-serine biosynthetic process // non-traceable author statement /// 0008152 // metabolic process // inferred from electronic annotation /// 0008615 // pyridoxine biosynthetic process // non-traceable author statement /// 0008652 // amino acid biosynthetic process // inferred from electronic annotation	---	0003824 // catalytic activity // inferred from electronic annotation /// 0004648 // phosphoserine transaminase activity // inferred from sequence or structural similarity /// 0004648 // phosphoserine transaminase activity // non-traceable author statement /// 0004648 // phosphoserine transaminase activity // inferred from electronic annotation /// 0005515 // protein binding // inferred from physi…
Group 2 vs 1	1625394_at	CG9922	FBgn0038196	849.702	1479.78	1.74153	0.00110829	768	DEG	Group 3 vs 1	1625394_at	849.702	1139.37	1.34091	0.00299076	1506	DEG_FC<1.5/-1.859	Group 3 vs 2	1625394_at	1479.78	1139.37	-1.29877	0.00477328	1245	DEG<1.5/-1.519	1625394_at	CG9922	---	chr3R:9860737-9861887 (-) // 100.0 //	---	---	0005515 // protein binding // inferred from physical interaction
Group 2 vs 1	1633003_at	CG30349	FBgn0050349	456.189	1090.37	2.39018	0.00111213	770	DEG	Group 3 vs 1	1633003_at	456.189	584.272	1.28077	0.0282856	2024	DEG_FC<1.5/-1.2302	Group 3 vs 2	1633003_at	1090.37	584.272	-1.86621	0.00114524	872	DEG	1633003_at	CG30349	---	chr2R:4795024-4798390 (+) // 100.0 //	---	---	---
Group 2 vs 1	1627110_at	Elp2	FBgn0033540	144.705	839.991	5.80485	0.00111406	771	DEG	Group 3 vs 1	1627110_at	144.705	544.567	3.76329	0	133	DEG	Group 3 vs 2	1627110_at	839.991	544.567	-1.54249	0.0047977	1249	DEG	1627110_at	Elp2	StIP	chr2R:6533229-6536144 (+) // 100.0 //	0006350 // transcription // inferred from electronic annotation /// 0006355 // regulation of transcription, DNA-dependent // inferred from electronic annotation /// 0006368 // RNA elongation from RNA polymerase II promoter // inferred from sequence or structural similarity /// 0043248 // proteasome assembly // inferred from sequence or structural similarity	0000502 // proteasome complex // inferred from sequence or structural similarity /// 0005634 // nucleus // inferred from electronic annotation /// 0005737 // cytoplasm // inferred from electronic annotation	0008538 // proteasome activator activity // inferred from sequence or structural similarity
Group 2 vs 1	1623859_at	mRpL49	FBgn0030433	916.521	1500.44	1.63711	0.00111794	773	DEG	Group 3 vs 1	1623859_at	916.521	1085.22	1.18406	0.0269082		nonDEG	Group 3 vs 2	1623859_at	1500.44	1085.22	-1.38262	0.00201385	969	DEG<1.5/-1.249	1623859_at	mRpL49	mitochondrial ribosomal protein L49	chrX:12801138-12801877 (+) // 100.0 //	0006412 // translation // inferred from electronic annotation /// 0006413 // translational initiation // inferred from electronic annotation	0005622 // intracellular // inferred from electronic annotation /// 0005739 // mitochondrion // inferred from electronic annotation /// 0005762 // mitochondrial large ribosomal subunit // inferred from sequence or structural similarity /// 0005840 // ribosome // inferred from electronic annotation /// 0030529 // ribonucleoprotein complex // inferred from electronic annotation	0003735 // structural constituent of ribosome // inferred from sequence or structural similarity /// 0003735 // structural constituent of ribosome // inferred from electronic annotation /// 0003743 // translation initiation factor activity // inferred from electronic annotation
Group 2 vs 1	1630375_at	Mec2	FBgn0030993	641.757	1312.41	2.04502	0.00113375	778	DEG	Group 3 vs 1	1630375_at	641.757	1426.53	2.22286	0	229	DEG	Group 3 vs 2	1630375_at	1312.41	1426.53	1.08696	0.0493204		nonDEG	1630375_at	Mec2	Mec2	chrX:19082067-19084226 (+) // 100.0 //	---	0016020 // membrane // inferred from electronic annotation	---
Group 2 vs 1	1627726_a_at	CG6404	FBgn0027615	454.005	1164.93	2.56591	0.00113777	780	DEG	Group 3 vs 1	1627726_a_at	454.005	659.615	1.45288	0.00884801	1693	DEG_FC<1.5/-1.1371	Group 3 vs 2	1627726_a_at	1164.93	659.615	-1.76608	0.0011666	878	DEG	1627726_a_at	CG6404	Biogenesis protein OXA1	chr3L:10877361-10879571 (-) // 100.0 //	0008535 // respiratory chain complex IV assembly // inferred from sequence or structural similarity /// 0051205 // protein insertion into membrane // inferred from electronic annotation	0005740 // mitochondrial envelope // inferred from sequence or structural similarity /// 0005743 // mitochondrial inner membrane // inferred from sequence or structural similarity /// 0016020 // membrane // inferred from electronic annotation /// 0016021 // integral to membrane // inferred from electronic annotation	0008565 // protein transporter activity // inferred from sequence or structural similarity
Group 2 vs 1	1622945_a_at	Aats-lys	FBgn0027084	773.629	1448.12	1.87186	0.00113979	781	DEG	Group 3 vs 1	1622945_a_at	773.629	1065.97	1.37788	0.00177979	1440	DEG_FC<1.5/-1.648	Group 3 vs 2	1622945_a_at	1448.12	1065.97	-1.35851	0.00282515	1064	DEG<1.5/-1.319	1622945_a_at	Aats-lys	Lysyl-tRNA synthetase	chrX:9500392-9502917 (-) // 100.0 //	0006412 // translation // inferred from electronic annotation /// 0006418 // tRNA aminoacylation for protein translation // inferred from electronic annotation /// 0006430 // lysyl-tRNA aminoacylation // inferred from sequence or structural similarity /// 0006430 // lysyl-tRNA aminoacylation // non-traceable author statement /// 0006430 // lysyl-tRNA aminoacylation // inferred from electronic ann…	0005737 // cytoplasm // inferred from electronic annotation	0000166 // nucleotide binding // inferred from electronic annotation /// 0003676 // nucleic acid binding // inferred from electronic annotation /// 0004812 // aminoacyl-tRNA ligase activity // inferred from electronic annotation /// 0004824 // lysine-tRNA ligase activity // inferred from sequence or structural similarity /// 0004824 // lysine-tRNA ligase activity // non-traceable author statement…
Group 2 vs 1	1624690_at	CG6878	FBgn0036488	659.485	1281.34	1.94295	0.00114794	783	DEG	Group 3 vs 1	1624690_at	659.485	783.891	1.18864	0.0580156		nonDEG	Group 3 vs 2	1624690_at	1281.34	783.891	-1.6346	0.00118653	885	DEG	1624690_at	CG6878	---	chr3L:15154914-15155571 (+) // 100.0 //	---	---	---
Group 2 vs 1	1633562_at	CG14569	FBgn0037123	41.9368	1187.16	28.3084	0.00115	784	DEG	Group 3 vs 1	1633562_at	41.9368	243.747	5.81224	0.0771392		nonDEG	Group 3 vs 2	1633562_at	1187.16	243.747	-4.87048	0.00283797	1067	DEG	1633562_at	CG14569	---	chr3L:21723823-21724647 (-) // 100.0 //	---	---	0005515 // protein binding // inferred from physical interaction
Group 2 vs 1	1627636_at	CG14636	FBgn0037217	380.532	1093.95	2.87479	0.00115206	785	DEG	Group 3 vs 1	1627636_at	380.532	946.145	2.48637	0	205	DEG	Group 3 vs 2	1627636_at	1093.95	946.145	-1.15622	0.108634		nonDEG	1627636_at	CG14636	---	chr3R:30206-41033 (-) // 100.0 //	---	---	---
Group 2 vs 1	1631474_s_at	Gpo-1	FBgn0022160	856.157	1541.61	1.80062	0.00115622	787	DEG	Group 3 vs 1	1631474_s_at	856.157	671.538	-1.27492	0.0116066	1753	DEG_FC<1.5/-1.1350	Group 3 vs 2	1631474_s_at	1541.61	671.538	-2.29565	0	189	DEG	1631474_s_at	Gpo-1	mitochondrial GPD	chr2R:11745255-11750251 (-) // 100.0 //	0006071 // glycerol metabolic process // inferred from sequence or structural similarity /// 0006072 // glycerol-3-phosphate metabolic process // inferred from electronic annotation /// 0006127 // glycerophosphate shuttle // inferred from mutant phenotype /// 0007629 // flight behavior // inferred from mutant phenotype /// 0055114 // oxidation reduction // inferred from electronic annotation	0005739 // mitochondrion // inferred by curator /// 0005739 // mitochondrion // inferred from sequence or structural similarity /// 0005743 // mitochondrial inner membrane // inferred from direct assay /// 0005811 // lipid particle // inferred from direct assay /// 0009331 // glycerol-3-phosphate dehydrogenase complex // inferred from electronic annotation	0004368 // glycerol-3-phosphate dehydrogenase activity // inferred from mutant phenotype /// 0004368 // glycerol-3-phosphate dehydrogenase activity // inferred from sequence or structural similarity /// 0004368 // glycerol-3-phosphate dehydrogenase activity // inferred from electronic annotation /// 0005509 // calcium ion binding // inferred from electronic annotation /// 0016491 // oxidoreductas…
Group 2 vs 1	1638546_at	CG13218	FBgn0033587	30.7213	821.07	26.7264	0.0011583	788	DEG	Group 3 vs 1	1638546_at	30.7213	299.163	9.73797	0.00241492	792	DEG	Group 3 vs 2	1638546_at	821.07	299.163	-2.74456	0.0110455	1611	DEG	1638546_at	CG13218	---	chr2R:7120768-7121209 (-) // 100.0 //	---	---	---
Group 2 vs 1	1627623_s_at	bic	FBgn0000181	27.0719	682.202	25.1996	0.0011625	789	DEG	Group 3 vs 1	1627623_s_at	27.0719	526.431	19.4457	0	42	DEG	Group 3 vs 2	1627623_s_at	682.202	526.431	-1.2959	0.0184941	1894	DEG<1.5/-1.529	1627623_s_at	bic	Enhancer of Bicaudal	chr2R:8757741-8759608 (+) // 100.0 //	0001700 // embryonic development via the syncytial blastoderm // inferred from mutant phenotype /// 0007317 // regulation of pole plasm oskar mRNA localization // inferred from mutant phenotype /// 0007318 // pole plasm protein localization // inferred from mutant phenotype /// 0015031 // protein transport // traceable author statement	0005854 // nascent polypeptide-associated complex // non-traceable author statement	0003700 // transcription factor activity // inferred from sequence or structural similarity /// 0005515 // protein binding // inferred from physical interaction /// 0008565 // protein transporter activity // traceable author statement
Group 2 vs 1	1634658_a_at	---	FBgn0033765	1074.61	1706.07	1.58762	0.00116461	790	DEG	Group 3 vs 1	1634658_a_at	1074.61	1041.69	-1.0316	0.182922		nonDEG	Group 3 vs 2	1634658_a_at	1706.07	1041.69	-1.63779	0	377	DEG	1634658_a_at	---	---	chr2R:8558109-8567094 (-) // 100.0 //	0006541 // glutamine metabolic process // inferred from sequence or structural similarity /// 0006541 // glutamine metabolic process // inferred from electronic annotation /// 0007613 // memory // inferred from mutant phenotype /// 0007626 // locomotory behavior // inferred from mutant phenotype	0005739 // mitochondrion // inferred from sequence or structural similarity	0004359 // glutaminase activity // inferred from sequence or structural similarity /// 0004359 // glutaminase activity // inferred from electronic annotation /// 0005515 // protein binding // inferred from physical interaction /// 0016787 // hydrolase activity // inferred from electronic annotation
Group 2 vs 1	1640122_at	SelG	FBgn0030350	1106.79	1733.75	1.56646	0.00117313	793	DEG	Group 3 vs 1	1640122_at	1106.79	1643.15	1.4846	0	416	DEG_FC<1.5/-1.12	Group 3 vs 2	1640122_at	1733.75	1643.15	-1.05514	0.0954318		nonDEG	1640122_at	SelG	Selenoprotein G	chrX:11781312-11782273 (+) // 99.52 //	0007275 // multicellular organismal development // inferred from electronic annotation /// 0008340 // determination of adult life span // inferred from direct assay /// 0009790 // embryonic development // inferred from direct assay	0000139 // Golgi membrane // inferred from electronic annotation /// 0005792 // microsome // inferred from direct assay /// 0005794 // Golgi apparatus // inferred from direct assay /// 0005794 // Golgi apparatus // inferred from electronic annotation /// 0016020 // membrane // inferred from electronic annotation /// 0016021 // integral to membrane // inferred from electronic annotation	0008430 // selenium binding // inferred from electronic annotation
Group 2 vs 1	1635838_at	CG13545	FBgn0034828	876.43	1516.64	1.73048	0.00117527	794	DEG	Group 3 vs 1	1635838_at	876.43	637.624	-1.37452	0.0122224	1774	DEG_FC<1.5/-1.1377	Group 3 vs 2	1635838_at	1516.64	637.624	-2.37858	0	179	DEG	1635838_at	CG13545	---	chr2R:19045235-19045636 (-) // 100.0 //	---	---	---
Group 2 vs 1	1633394_a_at	CG13900	FBgn0035162	528.562	1253.63	2.37177	0.0011796	796	DEG	Group 3 vs 1	1633394_a_at	528.562	806.882	1.52656	0.0018176	775	DEG	Group 3 vs 2	1633394_a_at	1253.63	806.882	-1.55367	0.00123822	895	DEG	1633394_a_at	CG13900	splicing factor 3b subunit 3	chr3L:826709-833402 (-) // 100.0 //	0000398 // nuclear mRNA splicing, via spliceosome // inferred from sequence or structural similarity /// 0007052 // mitotic spindle organization and biogenesis // inferred from mutant phenotype	0005634 // nucleus // inferred from electronic annotation /// 0005686 // snRNP U2 // inferred from sequence or structural similarity /// 0030532 // small nuclear ribonucleoprotein complex // inferred from sequence or structural similarity	0003676 // nucleic acid binding // inferred from electronic annotation /// 0003684 // damaged DNA binding // inferred from sequence or structural similarity
Group 2 vs 1	1625031_at	CG7841	FBgn0036502	606.211	1336.44	2.20458	0.00118395	797	DEG	Group 3 vs 1	1625031_at	606.211	608.353	1.00353			nonDEG	Group 3 vs 2	1625031_at	1336.44	608.353	-2.19682	0	207	DEG	1625031_at	CG7841	---	chr3L:15498538-15501388 (-) // 100.0 //	---	---	---
Group 2 vs 1	1635706_at	mRpL20	FBgn0036335	413.156	992.742	2.40283	0.00118833	799	DEG	Group 3 vs 1	1635706_at	413.156	560.917	1.35764	0.0202731	1914	DEG_FC<1.5/-1.1992	Group 3 vs 2	1635706_at	992.742	560.917	-1.76986	0.0012506	899	DEG	1635706_at	mRpL20	mitochondrial ribosomal protein L20	chr3L:13010244-13010933 (-) // 100.0 //	0006412 // translation // inferred from sequence or structural similarity /// 0006412 // translation // inferred from electronic annotation	0005622 // intracellular // inferred from electronic annotation /// 0005762 // mitochondrial large ribosomal subunit // inferred from sequence or structural similarity /// 0005840 // ribosome // inferred from electronic annotation /// 0030529 // ribonucleoprotein complex // inferred from electronic annotation	0003723 // RNA binding // inferred from electronic annotation /// 0003735 // structural constituent of ribosome // inferred from sequence or structural similarity /// 0003735 // structural constituent of ribosome // inferred from electronic annotation
Group 2 vs 1	1641435_at	CG1371	FBgn0033482	1037.23	1669.51	1.60958	0.00119054	800	DEG	Group 3 vs 1	1641435_at	1037.23	1297.25	1.25068	0.00364294	1536	DEG_FC<1.5/-1.943	Group 3 vs 2	1641435_at	1669.51	1297.25	-1.28696	0.002886	1078	DEG<1.5/-1.566	1641435_at	CG1371	---	chr2R:5958475-5963147 (-) // 100.0 //	---	---	0030246 // carbohydrate binding // inferred from electronic annotation
Group 2 vs 1	1629919_at	Cpr100A	FBgn0039805	932.898	1615.39	1.73158	0.0011972	803	DEG	Group 3 vs 1	1629919_at	932.898	1061.99	1.13838	0.0349151		nonDEG	Group 3 vs 2	1629919_at	1615.39	1061.99	-1.52109	0.00211607	990	DEG	1629919_at	Cpr100A	CG12045	chr3R:26693244-26694908 (+) // 100.0 //	---	---	0005214 // structural constituent of chitin-based cuticle // inferred from sequence or structural similarity /// 0005515 // protein binding // inferred from physical interaction /// 0042302 // structural constituent of cuticle // inferred from electronic annotation /// 0042802 // identical protein binding // inferred from physical interaction
Group 2 vs 1	1639123_at	CG4882	FBgn0025336	442.84	1024.19	2.31277	0.00120169	804	DEG	Group 3 vs 1	1639123_at	442.84	609.089	1.37541	0.0172632	1866	DEG_FC<1.5/-1.1853	Group 3 vs 2	1639123_at	1024.19	609.089	-1.6815	0.00211966	991	DEG	1639123_at	CG4882	undefined 1	chr2R:19768339-19769954 (-) // 100.0 //	---	0005634 // nucleus // inferred from sequence or structural similarity	0003700 // transcription factor activity // inferred from sequence or structural similarity /// 0005515 // protein binding // inferred from physical interaction
Group 2 vs 1	1625558_a_at	CG17290	FBgn0034201	41.4061	1122.11	27.1	0.00121075	807	DEG	Group 3 vs 1	1625558_a_at	41.4061	318.282	7.68682	0.0136557	1055	DEG	Group 3 vs 2	1625558_a_at	1122.11	318.282	-3.52551	0.00357314	1138	DEG	1625558_a_at	CG17290	---	chr2R:13042203-13042811 (+) // 99.23 //	---	---	---
Group 2 vs 1	1629588_at	TwdlP	FBgn0039435	834.407	1560.52	1.87022	0.00121534	809	DEG	Group 3 vs 1	1629588_at	834.407	692.223	-1.2054	0.0463545	2182	DEG_FC<1.5/-1.2498	Group 3 vs 2	1629588_at	1560.52	692.223	-2.25437	0	195	DEG	1629588_at	TwdlP	CG14240	chr3R:22446329-22447082 (-) // 100.0 //	---	---	---
Group 2 vs 1	1634232_at	mRpL13	FBgn0032720	519.934	1141.7	2.19586	0.00121765	811	DEG	Group 3 vs 1	1634232_at	519.934	697.591	1.34169	0.0202874	1915	DEG_FC<1.5/-1.1993	Group 3 vs 2	1634232_at	1141.7	697.591	-1.63663	0.00128398	908	DEG	1634232_at	mRpL13	mitochondrial ribosomal protein L13	chr2L:18858027-18859190 (-) // 99.19 //	0006412 // translation // inferred from sequence or structural similarity /// 0006412 // translation // non-traceable author statement /// 0006412 // translation // inferred from electronic annotation	0005622 // intracellular // inferred from electronic annotation /// 0005739 // mitochondrion // inferred from electronic annotation /// 0005762 // mitochondrial large ribosomal subunit // inferred from sequence or structural similarity /// 0005762 // mitochondrial large ribosomal subunit // non-traceable author statement /// 0005840 // ribosome // inferred from electronic annotation /// 0030529 /…	0003735 // structural constituent of ribosome // inferred from sequence or structural similarity /// 0003735 // structural constituent of ribosome // non-traceable author statement /// 0003735 // structural constituent of ribosome // inferred from electronic annotation
Group 2 vs 1	1626985_a_at	AIF	FBgn0031392	497.235	1197.73	2.40878	0.00122229	814	DEG	Group 3 vs 1	1626985_a_at	497.235	616.274	1.2394	0.0510104		nonDEG	Group 3 vs 2	1626985_a_at	1197.73	616.274	-1.9435	0	263	DEG	1626985_a_at	AIF	Apoptosis Inducing Factor	chr2L:2151663-2155390 (+) // 100.0 //	0006309 // DNA fragmentation during apoptosis // inferred from sequence or structural similarity /// 0006915 // apoptosis // inferred from electronic annotation /// 0006917 // induction of apoptosis // inferred from sequence or structural similarity /// 0045454 // cell redox homeostasis // inferred from electronic annotation /// 0055114 // oxidation reduction // inferred from electronic annotation	0005634 // nucleus // inferred from sequence or structural similarity /// 0005737 // cytoplasm // inferred from electronic annotation /// 0005739 // mitochondrion // inferred from electronic annotation /// 0005758 // mitochondrial intermembrane space // inferred from sequence or structural similarity /// 0005758 // mitochondrial intermembrane space // inferred from electronic annotation	0009055 // electron carrier activity // inferred from electronic annotation /// 0016491 // oxidoreductase activity // inferred from electronic annotation /// 0050660 // FAD binding // inferred from electronic annotation
Group 2 vs 1	1624805_at	CG31041	FBgn0051041	1465.11	892.79	-1.64105	0.00122229	815	DEG	Group 3 vs 1	1624805_at	1465.11	153.606	-9.53812	0	58	DEG	Group 3 vs 2	1624805_at	892.79	153.606	-5.8122	0	63	DEG	1624805_at	CG31041	---	chr3R:25416175-25416604 (-) // 100.0 //	---	---	---
Group 2 vs 1	1640020_at	CG10990	FBgn0030520	825.414	426.814	-1.9339	0.00122462	816	DEG	Group 3 vs 1	1640020_at	825.414	808.782	-1.02056			nonDEG	Group 3 vs 2	1640020_at	426.814	808.782	1.89493	0	279	DEG	1640020_at	CG10990	---	chrX:13640700-13649421 (-) // 100.0 //	---	---	---
Group 2 vs 1	1625802_a_at	CG13135	FBgn0032184	446.285	1.14623	-389.352	0.00122696	818	DEG	Group 3 vs 1	1625802_a_at	446.285	2.23666	-199.532	0	10	DEG	Group 3 vs 2	1625802_a_at	1.14623	2.23666	1.95132			nonDEG	1625802_a_at	CG13135	---	chr2L:10122340-10122739 (-) // 100.0 //	---	---	---
Group 2 vs 1	1627461_at	bsf	FBgn0032679	344.078	930.438	2.70415	0.00122696	819	DEG	Group 3 vs 1	1627461_at	344.078	460.557	1.33852	0.0400866	2132	DEG_FC<1.5/-1.2603	Group 3 vs 2	1627461_at	930.438	460.557	-2.02025	0.0012973	912	DEG	1627461_at	bsf	bicoid stability factor	chr2L:18449513-18454587 (-) // 100.0 //	---	0005737 // cytoplasm // inferred from direct assay	0003730 // mRNA 3'-UTR binding // inferred from direct assay /// 0003730 // mRNA 3'-UTR binding // non-traceable author statement
Group 2 vs 1	1636682_at	CG31778	FBgn0051778	561.481	159.525	-3.51971	0.00122931	820	DEG	Group 3 vs 1	1636682_at	561.481	313.926	-1.78858	0.0032608	833	DEG	Group 3 vs 2	1636682_at	159.525	313.926	1.96788	0.00793838	1447	DEG	1636682_at	CG31778	---	chr2L:3704105-3705462 (-) // 100.0 //	---	---	0004867 // serine-type endopeptidase inhibitor activity // inferred from electronic annotation
Group 2 vs 1	1641278_at	mRpS7	FBgn0032236	845.742	1535.69	1.81579	0.00122931	821	DEG	Group 3 vs 1	1641278_at	845.742	1103.83	1.30517	0.00423251	1550	DEG_FC<1.5/-1.996	Group 3 vs 2	1641278_at	1535.69	1103.83	-1.39124	0.00215621	1000	DEG<1.5/-1.229	1641278_at	mRpS7	mitochondrial ribosomal protein S7	chr2L:10386663-10387524 (+) // 100.0 //	0006412 // translation // inferred from sequence or structural similarity /// 0006412 // translation // inferred from electronic annotation	0005622 // intracellular // inferred from electronic annotation /// 0005739 // mitochondrion // inferred from electronic annotation /// 0005763 // mitochondrial small ribosomal subunit // inferred from sequence or structural similarity /// 0005840 // ribosome // inferred from electronic annotation /// 0022627 // cytosolic small ribosomal subunit // inferred from sequence or structural similarity …	0003723 // RNA binding // inferred from sequence or structural similarity /// 0003735 // structural constituent of ribosome // inferred from sequence or structural similarity /// 0003735 // structural constituent of ribosome // inferred from electronic annotation /// 0005515 // protein binding // inferred from physical interaction
Group 2 vs 1	1631931_s_at	Sdc	FBgn0010415	1081.1	678.385	-1.59363	0.00123167	822	DEG	Group 3 vs 1	1631931_s_at	1081.1	938.018	-1.15253	0.0249048		nonDEG	Group 3 vs 2	1631931_s_at	678.385	938.018	1.38272	0.00095175	786	DEG<1.5/-1.248	1631931_s_at	Sdc	Syndecan	chr2R:17281121-17368673 (-) // 100.0 //	0007275 // multicellular organismal development // inferred from electronic annotation /// 0007399 // nervous system development // inferred from electronic annotation /// 0007411 // axon guidance // inferred from mutant phenotype /// 0007519 // skeletal muscle development // inferred from electronic annotation /// 0008045 // motor axon guidance // inferred from mutant phenotype /// 0030154 // ce…	0005576 // extracellular region // non-traceable author statement /// 0005886 // plasma membrane // inferred from sequence or structural similarity /// 0005886 // plasma membrane // non-traceable author statement /// 0005925 // focal adhesion // inferred from sequence or structural similarity /// 0016020 // membrane // inferred from electronic annotation /// 0016021 // integral to membrane // inf…	0004888 // transmembrane receptor activity // inferred from sequence or structural similarity /// 0005515 // protein binding // inferred from physical interaction /// 0008092 // cytoskeletal protein binding // inferred from electronic annotation
Group 2 vs 1	1641124_at	CG5110	FBgn0032642	418.274	1068.93	2.55559	0.00123404	823	DEG	Group 3 vs 1	1641124_at	418.274	1383.49	3.30761	0	152	DEG	Group 3 vs 2	1641124_at	1068.93	1383.49	1.29427	0	644	DEG<1.5/-1.190	1641124_at	CG5110	---	chr2L:17481245-17481855 (+) // 100.0 //	0016310 // phosphorylation // inferred from sequence or structural similarity	---	0005070 // SH3/SH2 adaptor activity // inferred from sequence or structural similarity /// 0005515 // protein binding // inferred from physical interaction
Group 2 vs 1	1631671_at	CG13827	FBgn0039068	627.974	323.049	-1.9439	0.0012388	826	DEG	Group 3 vs 1	1631671_at	627.974	347.475	-1.80725	0.00134283	726	DEG	Group 3 vs 2	1631671_at	323.049	347.475	1.07561			nonDEG	1631671_at	CG13827	---	chr3R:19084090-19086324 (+) // 100.0 //	0005975 // carbohydrate metabolic process // inferred from electronic annotation /// 0016559 // peroxisome fission // inferred from electronic annotation	0005778 // peroxisomal membrane // inferred from electronic annotation	---
Group 2 vs 1	1636979_at	CG7912	FBgn0039736	570.361	227.852	-2.50321	0.0012436	829	DEG	Group 3 vs 1	1636979_at	570.361	197.468	-2.88837	0	170	DEG	Group 3 vs 2	1636979_at	227.852	197.468	-1.15386			nonDEG	1636979_at	CG7912	---	chr3R:25831757-25833954 (-) // 100.0 //	0006810 // transport // inferred from electronic annotation	0016020 // membrane // inferred from electronic annotation /// 0016021 // integral to membrane // inferred from electronic annotation	0005215 // transporter activity // inferred from electronic annotation /// 0015381 // high affinity sulfate transmembrane transporter activity // inferred from sequence or structural similarity
Group 2 vs 1	1641602_at	CG13170	FBgn0033703	49.2535	773.887	15.7123	0.00124602	830	DEG	Group 3 vs 1	1641602_at	49.2535	294.731	5.98397	0.00570985	927	DEG	Group 3 vs 2	1641602_at	773.887	294.731	-2.62574	0.00430647	1226	DEG	1641602_at	CG13170	---	chr2R:8127913-8128267 (+) // 100.0 //	---	---	---
Group 2 vs 1	1639509_at	Nnp-1	FBgn0022069	605.445	1279.2	2.11282	0.00124844	832	DEG	Group 3 vs 1	1639509_at	605.445	654.676	1.08131	0.163562		nonDEG	Group 3 vs 2	1639509_at	1279.2	654.676	-1.95394	0	258	DEG	1639509_at	Nnp-1	Nnp-1	chr2L:13363299-13366188 (-) // 100.0 //	0000022 // mitotic spindle elongation // inferred from mutant phenotype /// 0006364 // rRNA processing // inferred from sequence or structural similarity /// 0006364 // rRNA processing // inferred from electronic annotation /// 0016072 // rRNA metabolic process // non-traceable author statement	0005634 // nucleus // inferred from sequence or structural similarity /// 0005634 // nucleus // non-traceable author statement /// 0005634 // nucleus // inferred from electronic annotation /// 0030688 // nucleolar preribosome, small subunit precursor // inferred from electronic annotation	0005515 // protein binding // inferred from physical interaction
Group 2 vs 1	1638038_at	CG4335	FBgn0038795	818.212	492.976	-1.65974	0.00125088	834	DEG	Group 3 vs 1	1638038_at	818.212	467.163	-1.75145	0	320	DEG	Group 3 vs 2	1638038_at	492.976	467.163	-1.05526			nonDEG	1638038_at	CG4335	---	chr3R:16232391-16233545 (-) // 100.0 //	0045329 // carnitine biosynthetic process // inferred from electronic annotation /// 0055114 // oxidation reduction // inferred from electronic annotation	---	0005506 // iron ion binding // inferred from electronic annotation /// 0005515 // protein binding // inferred from physical interaction /// 0008336 // gamma-butyrobetaine dioxygenase activity // inferred from sequence or structural similarity /// 0008336 // gamma-butyrobetaine dioxygenase activity // inferred from electronic annotation /// 0009055 // electron carrier activity // inferred from ele…
Group 2 vs 1	1638419_at	Sgs1	FBgn0003372	643.219	0.494632	-1300.4	0.00125577	838	DEG	Group 3 vs 1	1638419_at	643.219	2043.85	3.17754	0	157	DEG	Group 3 vs 2	1638419_at	0.494632	2043.85	4132.07	0	6	DEG	1638419_at	Sgs1	Salivary gland secretion 1	chr2L:4937408-4941424 (+) // 99.31 // /// chr2L:4938585-4940981 (+) // 54.7 // /// chr2L:4938881-4940979 (+) // 51.57 // /// chr2L:4939021-4940979 (+) // 50.19 // /// chr2L:4939169-4940979 (+) // 46.5 // /// chr2L:4939213-4940931 (+) // 44.06 // /// chr2L:4939311-4940979 (+) // 42.62 // /// chr2L:4939357-4940979 (+) // 41.43 // /// chr2L:4939405-4940979 (+) // 40.15 // /// chr2L:4939454-4940931 (…	0007594 // puparial adhesion // traceable author statement	0005576 // extracellular region // traceable author statement	0005198 // structural molecule activity // traceable author statement
Group 2 vs 1	1625680_a_at	CG5792	FBgn0032455	264.87	960.977	3.6281	0.00126071	842	DEG	Group 3 vs 1	1625680_a_at	264.87	850.154	3.2097	0	154	DEG	Group 3 vs 2	1625680_a_at	960.977	850.154	-1.13036	0.0365742		nonDEG	1625680_a_at	CG5792	---	chr2L:12713274-12721838 (-) // 100.0 //	---	---	0005515 // protein binding // inferred from physical interaction
Group 2 vs 1	1640515_s_at	lqf	FBgn0028582	979.634	652.774	-1.50072	0.00126071	843	DEG	Group 3 vs 1	1640515_s_at	979.634	851.312	-1.15073	0.0186532		nonDEG	Group 3 vs 2	1640515_s_at	652.774	851.312	1.30414	0.00176141	942	DEG<1.5/-1.507	1640515_s_at	lqf	Enhancer of faf bE25	chr3L:7521903-7531379 (+) // 100.0 //	0006897 // endocytosis // inferred from mutant phenotype /// 0006897 // endocytosis // non-traceable author statement /// 0006897 // endocytosis // traceable author statement /// 0007269 // neurotransmitter secretion // non-traceable author statement /// 0008593 // regulation of Notch signaling pathway // inferred from mutant phenotype /// 0009997 // negative regulation of cardioblast cell fate s…	---	---
Group 2 vs 1	1636688_at	Cyp4s3	FBgn0030615	429.837	135.078	-3.18214	0.00126319	844	DEG	Group 3 vs 1	1636688_at	429.837	189.695	-2.26593	0.00136424	730	DEG	Group 3 vs 2	1636688_at	135.078	189.695	1.40434	0.0581522		nonDEG	1636688_at	Cyp4s3	Cyp4s3	chrX:15007334-15010572 (-) // 100.0 //	0055114 // oxidation reduction // inferred from electronic annotation	0005783 // endoplasmic reticulum // inferred from electronic annotation /// 0005789 // endoplasmic reticulum membrane // inferred from electronic annotation /// 0005792 // microsome // non-traceable author statement /// 0005792 // microsome // inferred from electronic annotation /// 0016020 // membrane // non-traceable author statement /// 0016020 // membrane // inferred from electronic annotation	0004497 // monooxygenase activity // inferred from electronic annotation /// 0005506 // iron ion binding // inferred from electronic annotation /// 0005515 // protein binding // inferred from physical interaction /// 0009055 // electron carrier activity // inferred from electronic annotation /// 0009055 // electron carrier activity // inferred from sequence or structural similarity /// 0009055 //…
Group 2 vs 1	1623182_at	mRpL51	FBgn0032053	577.297	1244.09	2.15502	0.00126319	845	DEG	Group 3 vs 1	1623182_at	577.297	896.392	1.55274	0.00187743	779	DEG	Group 3 vs 2	1623182_at	1244.09	896.392	-1.38788	0.00495614	1281	DEG<1.5/-1.239	1623182_at	mRpL51	mitochondrial ribosomal protein L51	chr2L:8516753-8517377 (-) // 100.0 //	0006412 // translation // inferred from sequence or structural similarity	0005739 // mitochondrion // inferred from electronic annotation /// 0005762 // mitochondrial large ribosomal subunit // inferred from sequence or structural similarity /// 0005840 // ribosome // inferred from electronic annotation /// 0030529 // ribonucleoprotein complex // inferred from electronic annotation	0003735 // structural constituent of ribosome // inferred from sequence or structural similarity /// 0005515 // protein binding // inferred from physical interaction
Group 2 vs 1	1632156_at	---	---	555.569	219.934	-2.52607	0.00126568	846	DEG	Group 3 vs 1	1632156_at	555.569	229.786	-2.41777	0	210	DEG	Group 3 vs 2	1632156_at	219.934	229.786	1.04479			nonDEG	1632156_at	---	---	chr3R:15119787-15122592 (+) // 100.0 //	---	---	---
Group 2 vs 1	1633613_at	CG2765 /// DsimCG2765	FBgn0035087	1405.63	2121.84	1.50953	0.00126568	847	DEG	Group 3 vs 1	1633613_at	1405.63	1290.96	-1.08882	0.0336461		nonDEG	Group 3 vs 2	1633613_at	2121.84	1290.96	-1.64361	0	371	DEG	1633613_at	CG2765 /// DsimCG2765	--- /// ---	chr2R:20847361-20852606 (-) // 100.0 //	---	---	0005515 // protein binding // inferred from physical interaction
Group 2 vs 1	1638636_at	CG12512	FBgn0031703	724.5	388.794	-1.86345	0.00126818	848	DEG	Group 3 vs 1	1638636_at	724.5	493.506	-1.46807	0.00241006	1470	DEG_FC<1.5/-1.634	Group 3 vs 2	1638636_at	388.794	493.506	1.26932	0.0153385	1784	DEG<1.5/-1.645	1638636_at	CG12512	---	chr2L:5339224-5342349 (-) // 100.0 //	0008152 // metabolic process // inferred from electronic annotation	---	0003824 // catalytic activity // inferred from electronic annotation /// 0004467 // long-chain-fatty-acid-CoA ligase activity // inferred from sequence or structural similarity /// 0004467 // long-chain-fatty-acid-CoA ligase activity // inferred from electronic annotation /// 0016874 // ligase activity // inferred from electronic annotation
Group 2 vs 1	1637710_at	kst	FBgn0004167	1103.54	1684.36	1.52633	0.00126818	849	DEG	Group 3 vs 1	1637710_at	1103.54	1678.65	1.52115	0	402	DEG	Group 3 vs 2	1637710_at	1684.36	1678.65	-1.0034			nonDEG	1637710_at	kst	betaH-Spectrin	chr3L:3351526-3368136 (+) // 100.0 //	0000910 // cytokinesis // inferred from mutant phenotype /// 0006364 // rRNA processing // inferred from electronic annotation /// 0007009 // plasma membrane organization and biogenesis // traceable author statement /// 0030707 // ovarian follicle cell development // traceable author statement /// 0045186 // zonula adherens assembly // traceable author statement	0008091 // spectrin // inferred from sequence or structural similarity /// 0016327 // apicolateral plasma membrane // traceable author statement	0003779 // actin binding // inferred from direct assay /// 0003779 // actin binding // inferred from sequence or structural similarity /// 0003779 // actin binding // inferred from electronic annotation /// 0005515 // protein binding // inferred from physical interaction /// 0008017 // microtubule binding // inferred from direct assay /// 0008092 // cytoskeletal protein binding // inferred from s…
Group 2 vs 1	1635936_at	CG13822	FBgn0039098	547.641	235.824	-2.32225	0.00127321	850	DEG	Group 3 vs 1	1635936_at	547.641	411.746	-1.33005	0.0176147	1874	DEG_FC<1.5/-1.1610	Group 3 vs 2	1635936_at	235.824	411.746	1.74599	0.00424412	1207	DEG	1635936_at	CG13822	---	chr3R:19503079-19504145 (+) // 100.0 //	---	---	0005515 // protein binding // inferred from physical interaction
Group 2 vs 1	1629542_at	CG31821	FBgn0051821	527.585	172.298	-3.06205	0.00127575	851	DEG	Group 3 vs 1	1629542_at	527.585	120.519	-4.37761	0	108	DEG	Group 3 vs 2	1629542_at	172.298	120.519	-1.42963	0.0804549		nonDEG	1629542_at	CG31821	---	chr2L:15901040-15902377 (-) // 100.0 //	0006508 // proteolysis // inferred from electronic annotation	---	0004180 // carboxypeptidase activity // inferred from electronic annotation /// 0004185 // serine-type carboxypeptidase activity // inferred from sequence or structural similarity /// 0004185 // serine-type carboxypeptidase activity // inferred from electronic annotation /// 0016787 // hydrolase activity // inferred from electronic annotation
Group 2 vs 1	1623678_at	mRpS30	FBgn0030692	660.682	1311.26	1.9847	0.00127575	852	DEG	Group 3 vs 1	1623678_at	660.682	824.34	1.24771	0.0227688	1952	DEG_FC<1.5/-1.2100	Group 3 vs 2	1623678_at	1311.26	824.34	-1.59067	0.00133611	922	DEG	1623678_at	mRpS30	mitochondrial ribosomal protein S30	chrX:15680103-15682081 (+) // 100.0 //	0006412 // translation // inferred from sequence or structural similarity /// 0006412 // translation // inferred from electronic annotation	0005739 // mitochondrion // inferred from electronic annotation /// 0005763 // mitochondrial small ribosomal subunit // inferred from sequence or structural similarity /// 0005840 // ribosome // inferred from electronic annotation	0003735 // structural constituent of ribosome // inferred from sequence or structural similarity /// 0003735 // structural constituent of ribosome // inferred from electronic annotation /// 0005515 // protein binding // inferred from physical interaction
Group 2 vs 1	1626773_s_at	CG18431 /// CG4844	FBgn0061354 /// FBgn0061355	694.971	361.047	-1.92487	0.00127829	853	DEG	Group 3 vs 1	1626773_s_at	694.971	775.69	1.11615	0.116572		nonDEG	Group 3 vs 2	1626773_s_at	361.047	775.69	2.14844	0	214	DEG	1626773_s_at	CG18431 /// CG4844	--- /// anon-fast-evolving-2D7	chr2R:13390232-13396152 (+) // 100.0 //	---	---	0005488 // binding // inferred from electronic annotation
Group 2 vs 1	1639198_at	CG8635	FBgn0033317	840.005	1524.03	1.81431	0.00127829	854	DEG	Group 3 vs 1	1639198_at	840.005	1154.82	1.37478	0.00114076	1389	DEG_FC<1.5/-1.471	Group 3 vs 2	1639198_at	1524.03	1154.82	-1.31971	0.00296351	1093	DEG<1.5/-1.455	1639198_at	CG8635	---	chr2R:4517698-4519467 (-) // 100.0 //	---	---	0003676 // nucleic acid binding // inferred from electronic annotation /// 0008270 // zinc ion binding // inferred from electronic annotation /// 0046872 // metal ion binding // inferred from electronic annotation
Group 2 vs 1	1623797_at	CG5969	FBgn0036998	882.15	1463.74	1.65929	0.0012834	855	DEG	Group 3 vs 1	1623797_at	882.15	1253.13	1.42054	0.00114294	1390	DEG_FC<1.5/-1.462	Group 3 vs 2	1623797_at	1463.74	1253.13	-1.16807	0.0266463		nonDEG	1623797_at	CG5969	---	chr3L:20466896-20467894 (+) // 100.0 //	---	---	0005515 // protein binding // inferred from physical interaction
Group 2 vs 1	1635542_at	l(3)02640	FBgn0010786	367.483	1083.27	2.94781	0.00128855	859	DEG	Group 3 vs 1	1635542_at	367.483	688.047	1.87233	0.00115173	717	DEG	Group 3 vs 2	1635542_at	1083.27	688.047	-1.57441	0.00221738	1014	DEG	1635542_at	l(3)02640	lethal (3) 02640	chr3L:1334876-1339407 (+) // 100.0 //	0033014 // tetrapyrrole biosynthetic process // inferred from electronic annotation	---	0004418 // hydroxymethylbilane synthase activity // inferred from sequence or structural similarity /// 0004418 // hydroxymethylbilane synthase activity // inferred from electronic annotation /// 0016740 // transferase activity // inferred from electronic annotation
Group 2 vs 1	1634351_at	CG7860	FBgn0030653	708.074	297.029	-2.38385	0.00129115	860	DEG	Group 3 vs 1	1634351_at	708.074	735.487	1.03871			nonDEG	Group 3 vs 2	1634351_at	297.029	735.487	2.47614	0	167	DEG	1634351_at	CG7860	---	chrX:15463025-15464474 (+) // 100.0 //	0033345 // asparagine catabolic process via L-aspartate // inferred from sequence or structural similarity /// 0035071 // salivary gland cell autophagic cell death // inferred from expression pattern /// 0048102 // autophagic cell death // inferred from expression pattern	0005737 // cytoplasm // inferred from sequence or structural similarity	0003948 // N4-(beta-N-acetylglucosaminyl)-L-asparaginase activity // inferred from sequence or structural similarity /// 0004067 // asparaginase activity // inferred from sequence or structural similarity /// 0004067 // asparaginase activity // inferred from electronic annotation /// 0005515 // protein binding // inferred from physical interaction /// 0016787 // hydrolase activity // inferred fro…
Group 2 vs 1	1639763_at	CG3420	FBgn0033100	677.595	1251.44	1.84688	0.00129115	861	DEG	Group 3 vs 1	1639763_at	677.595	920.176	1.358	0.00475857	1569	DEG_FC<1.5/-1.1048	Group 3 vs 2	1639763_at	1251.44	920.176	-1.36	0.00365673	1152	DEG<1.5/-1.312	1639763_at	CG3420	---	chr2R:2643794-2644525 (-) // 100.0 //	---	0031966 // mitochondrial membrane // inferred from electronic annotation	0051537 // 2 iron, 2 sulfur cluster binding // inferred from electronic annotation
Group 2 vs 1	1629936_at	mRpL16	FBgn0023519	668.586	1257.67	1.88109	0.00129636	863	DEG	Group 3 vs 1	1629936_at	668.586	953.641	1.42635	0.0025594	1496	DEG_FC<1.5/-1.766	Group 3 vs 2	1629936_at	1257.67	953.641	-1.31881	0.00725406	1410	DEG<1.5/-1.459	1629936_at	mRpL16	mitochondrial ribosomal protein L16	chrX:1784331-1785313 (+) // 100.0 //	0006412 // translation // inferred from sequence or structural similarity /// 0006412 // translation // inferred from electronic annotation	0005622 // intracellular // inferred from electronic annotation /// 0005762 // mitochondrial large ribosomal subunit // inferred from sequence or structural similarity /// 0005840 // ribosome // inferred from electronic annotation	0003735 // structural constituent of ribosome // inferred from sequence or structural similarity /// 0003735 // structural constituent of ribosome // inferred from electronic annotation
Group 2 vs 1	1638343_at	CG1143	FBgn0035359	785.733	1456.23	1.85334	0.00129899	864	DEG	Group 3 vs 1	1638343_at	785.733	1356.45	1.72635	0	330	DEG	Group 3 vs 2	1638343_at	1456.23	1356.45	-1.07356	0.105016		nonDEG	1638343_at	CG1143	---	chr3L:2645372-2646499 (+) // 100.0 //	---	---	---
Group 2 vs 1	1629771_at	Cyp12a5	FBgn0038680	1132.67	685.103	-1.65328	0.00129899	865	DEG	Group 3 vs 1	1629771_at	1132.67	500.137	-2.26471	0	221	DEG	Group 3 vs 2	1629771_at	685.103	500.137	-1.36983	0.0178366	1867	DEG<1.5/-1.284	1629771_at	Cyp12a5	Cyp12a5	chr3R:14958173-14960429 (+) // 100.0 //	0055114 // oxidation reduction // inferred from electronic annotation	0005739 // mitochondrion // inferred from sequence or structural similarity /// 0005739 // mitochondrion // non-traceable author statement /// 0005739 // mitochondrion // inferred from electronic annotation /// 0016020 // membrane // inferred from electronic annotation /// 0031966 // mitochondrial membrane // inferred from electronic annotation	0004497 // monooxygenase activity // inferred from electronic annotation /// 0005506 // iron ion binding // inferred from electronic annotation /// 0009055 // electron carrier activity // inferred from electronic annotation /// 0009055 // electron carrier activity // inferred from sequence or structural similarity /// 0009055 // electron carrier activity // non-traceable author statement /// 0016…
Group 2 vs 1	1629388_s_at	CG34317 /// CG7950	FBgn0039745 /// FBgn0085346	389.94	1056.42	2.70918	0.00130427	868	DEG	Group 3 vs 1	1629388_s_at	389.94	645.597	1.65563	0.00256671	815	DEG	Group 3 vs 2	1629388_s_at	1056.42	645.597	-1.63634	0.00223321	1018	DEG	1629388_s_at	CG34317 /// CG7950	--- /// ---	chr3R:25882574-25883903 (+) // 100.0 //	0008033 // tRNA processing // inferred from electronic annotation	---	0004540 // ribonuclease activity // inferred from electronic annotation
Group 2 vs 1	1627190_at	CG13228	FBgn0033588	39.9455	650.35	16.2809	0.00130692	870	DEG	Group 3 vs 1	1627190_at	39.9455	288.7	7.22734	0.00478027	897	DEG	Group 3 vs 2	1627190_at	650.35	288.7	-2.25269	0.00671563	1381	DEG	1627190_at	CG13228	---	chr2R:7121507-7121915 (+) // 100.0 //	---	---	---
Group 2 vs 1	1628481_at	mRpL1	FBgn0037566	411.94	1033.51	2.50889	0.00131496	876	DEG	Group 3 vs 1	1628481_at	411.94	622.972	1.51229	0.00669502	948	DEG	Group 3 vs 2	1628481_at	1033.51	622.972	-1.659	0.00224524	1020	DEG	1628481_at	mRpL1	mitochondrial ribosomal protein L1	chr3R:4127163-4128493 (+) // 100.0 //	0006412 // translation // inferred from sequence or structural similarity /// 0006412 // translation // inferred from electronic annotation	0005622 // intracellular // inferred from electronic annotation /// 0005739 // mitochondrion // inferred from electronic annotation /// 0005762 // mitochondrial large ribosomal subunit // inferred from sequence or structural similarity /// 0005840 // ribosome // inferred from electronic annotation /// 0015934 // large ribosomal subunit // inferred from electronic annotation	0003723 // RNA binding // inferred from electronic annotation /// 0003735 // structural constituent of ribosome // inferred from sequence or structural similarity /// 0003735 // structural constituent of ribosome // inferred from electronic annotation
Group 2 vs 1	1629511_at	CG5326	FBgn0038983	253.425	984.474	3.88468	0.00131766	877	DEG	Group 3 vs 1	1629511_at	253.425	357.721	1.41155	0.0531257		nonDEG	Group 3 vs 2	1629511_at	984.474	357.721	-2.75207	0.00138035	933	DEG	1629511_at	CG5326	---	chr3R:18357893-18365639 (-) // 100.0 //	---	0016021 // integral to membrane // inferred from electronic annotation	0008415 // acyltransferase activity // inferred from electronic annotation /// 0016740 // transferase activity // inferred from electronic annotation
Group 2 vs 1	1624705_a_at	fax	FBgn0014163	925.578	532.579	-1.73792	0.00131766	878	DEG	Group 3 vs 1	1624705_a_at	925.578	959.908	1.03709	0.152965		nonDEG	Group 3 vs 2	1624705_a_at	532.579	959.908	1.80238	0	310	DEG	1624705_a_at	fax	failed axon connections	chr3L:16396884-16404939 (-) // 100.0 //	0007409 // axonogenesis // inferred from genetic interaction /// 0007409 // axonogenesis // traceable author statement	---	0005515 // protein binding // inferred from physical interaction
Group 2 vs 1	1630352_at	CG13445	FBgn0036532	16.0539	1322.82	82.3987	0.00132037	879	DEG	Group 3 vs 1	1630352_at	16.0539	97.3531	6.06415			nonDEG	Group 3 vs 2	1630352_at	1322.82	97.3531	-13.5878	0.00138341	934	DEG	1630352_at	CG13445	---	chr3L:15802597-15802983 (+) // 100.0 //	---	---	---
Group 2 vs 1	1637055_s_at	---	---	370.25	15.9864	-23.1603	0.00132309	881	DEG	Group 3 vs 1	1637055_s_at	370.25	11.9318	-31.0306	0	30	DEG	Group 3 vs 2	1637055_s_at	15.9864	11.9318	-1.33982			nonDEG	1637055_s_at	---	---	chrX:1522061-1529472 (-) // 100.0 // /// chr2L:20183698-20191109 (-) // 100.0 // /// chr2L:20190614-20198025 (-) // 99.99 // /// chr2L:20176782-20184193 (-) // 99.97 //	---	---	---
Group 2 vs 1	1627795_at	Ir	FBgn0039061	837.213	504.844	-1.65836	0.00132857	884	DEG	Group 3 vs 1	1627795_at	837.213	491.778	-1.70242	0	337	DEG	Group 3 vs 2	1627795_at	504.844	491.778	-1.02657			nonDEG	1627795_at	Ir	Drosophila inward rectifier	chr3R:19008641-19011281 (+) // 100.0 //	0006810 // transport // inferred from electronic annotation /// 0006811 // ion transport // inferred from electronic annotation /// 0006813 // potassium ion transport // inferred from electronic annotation	0016020 // membrane // inferred from electronic annotation /// 0016021 // integral to membrane // inferred from electronic annotation	0005216 // ion channel activity // inferred from electronic annotation /// 0005242 // inward rectifier potassium channel activity // non-traceable author statement /// 0005242 // inward rectifier potassium channel activity // inferred from electronic annotation /// 0005244 // voltage-gated ion channel activity // inferred from electronic annotation /// 0015272 // ATP-activated inward rectifier po…
Group 2 vs 1	1631636_at	CG13096	FBgn0032050	422.294	1021.53	2.41901	0.00133688	888	DEG	Group 3 vs 1	1631636_at	422.294	578.379	1.36961	0.0117833	1764	DEG_FC<1.5/-1.1554	Group 3 vs 2	1631636_at	1021.53	578.379	-1.7662	0.00140833	938	DEG	1631636_at	CG13096	---	chr2L:8509244-8511870 (-) // 100.0 //	0006412 // translation // inferred from electronic annotation	0005622 // intracellular // inferred from electronic annotation /// 0005840 // ribosome // inferred from electronic annotation	0003735 // structural constituent of ribosome // inferred from electronic annotation
Group 2 vs 1	1634594_at	CG17738	FBgn0038009	682.186	305.418	-2.23361	0.00133688	889	DEG	Group 3 vs 1	1634594_at	682.186	1437.75	2.10756	0	248	DEG	Group 3 vs 2	1634594_at	305.418	1437.75	4.70747	0	74	DEG	1634594_at	CG17738	---	chr3R:8096641-8096974 (+) // 100.0 //	---	---	0005515 // protein binding // inferred from physical interaction
Group 2 vs 1	1637486_at	CG31698	FBgn0051698	502.907	7.37808	-68.1622	0.00133967	890	DEG	Group 3 vs 1	1637486_at	502.907	2053.01	4.0823	0	121	DEG	Group 3 vs 2	1637486_at	7.37808	2053.01	278.258	0	16	DEG	1637486_at	CG31698	---	chr2L:3173269-3173826 (-) // 100.0 //	---	---	---
Group 2 vs 1	1633344_at	Cpr92F	FBgn0038819	461.703	1092.77	2.36682	0.00133967	891	DEG	Group 3 vs 1	1633344_at	461.703	752.759	1.6304	0.00260014	820	DEG	Group 3 vs 2	1633344_at	1092.77	752.759	-1.45169	0.00615301	1350	DEG<1.5/-1.81	1633344_at	Cpr92F	CG5494	chr3R:16495292-16498538 (+) // 100.0 //	---	---	0005214 // structural constituent of chitin-based cuticle // inferred from sequence or structural similarity /// 0005515 // protein binding // inferred from physical interaction /// 0042302 // structural constituent of cuticle // inferred from electronic annotation
Group 2 vs 1	1640355_at	CG5246	FBgn0038484	616.249	212.903	-2.8945	0.00134247	892	DEG	Group 3 vs 1	1640355_at	616.249	349.54	-1.76303	0.00146073	741	DEG	Group 3 vs 2	1640355_at	212.903	349.54	1.64178	0.00430252	1225	DEG	1640355_at	CG5246	---	chr3R:12961926-12962921 (+) // 99.5 //	0006508 // proteolysis // inferred from electronic annotation /// 0006508 // proteolysis // non-traceable author statement	---	0003824 // catalytic activity // inferred from electronic annotation /// 0004252 // serine-type endopeptidase activity // inferred from electronic annotation /// 0004252 // serine-type endopeptidase activity // non-traceable author statement /// 0005515 // protein binding // inferred from physical interaction /// 0008233 // peptidase activity // inferred from electronic annotation /// 0016787 // …
Group 2 vs 1	1639171_at	mRpL14	FBgn0040389	651.305	1276	1.95915	0.00134247	893	DEG	Group 3 vs 1	1639171_at	651.305	888.012	1.36344	0.00719399	1659	DEG_FC<1.5/-1.1265	Group 3 vs 2	1639171_at	1276	888.012	-1.43692	0.00225333	1022	DEG<1.5/-1.125	1639171_at	mRpL14	mitochondrial ribosomal protein L14	chrX:2238027-2238670 (-) // 100.0 //	0006412 // translation // inferred from sequence or structural similarity /// 0006412 // translation // inferred from electronic annotation	0005622 // intracellular // inferred from electronic annotation /// 0005762 // mitochondrial large ribosomal subunit // inferred from sequence or structural similarity /// 0005840 // ribosome // inferred from electronic annotation	0003735 // structural constituent of ribosome // inferred from sequence or structural similarity /// 0003735 // structural constituent of ribosome // inferred from electronic annotation
Group 2 vs 1	1633492_at	hgo	FBgn0040211	525.18	173.656	-3.02426	0.00134528	894	DEG	Group 3 vs 1	1633492_at	525.18	516.538	-1.01673			nonDEG	Group 3 vs 2	1633492_at	173.656	516.538	2.97449	0	129	DEG	1633492_at	hgo	homogentisate 1,2-dioxygenase	chr2L:11136394-11138567 (+) // 100.0 //	0006559 // L-phenylalanine catabolic process // inferred from electronic annotation /// 0006559 // L-phenylalanine catabolic process // non-traceable author statement /// 0006570 // tyrosine metabolic process // inferred from electronic annotation /// 0006572 // tyrosine catabolic process // non-traceable author statement /// 0006572 // tyrosine catabolic process // inferred from electronic annot…	---	0004411 // homogentisate 1,2-dioxygenase activity // inferred from sequence or structural similarity /// 0004411 // homogentisate 1,2-dioxygenase activity // non-traceable author statement /// 0004411 // homogentisate 1,2-dioxygenase activity // inferred from electronic annotation /// 0005506 // iron ion binding // inferred from electronic annotation /// 0016491 // oxidoreductase activity // infe…
[truncated: 3,631 more rows]

## Sheet: Readme
1. normalization method: Plier
[truncated: 5 more rows]
