# Supplementary material for: The Mechanisms Underlying α-Amanitin Resistance in Drosophila melanogaster: A Microarray Analysis
Source: PLoS One. 2014 Apr 2;9(4):e93489. doi: 10.1371/journal.pone.0093489 (PMC3973583; doi:10.1371/journal.pone.0093489)
Supplement: Table S2 — Complete single gene analysis for Ama-KTT/M/2 versus Canton-S on no toxin (group 2 versus 1). This table contains well-annotated genes that are at least 2.0-fold constitutively up-regulated in the resistant stock, as compared to the sensitive stock, on no toxin. The p-value cutoff is p<0.05. (XLSX) [file pone.0093489.s002.xlsx]

## Sheet: Sheet1
Table S2: Complete single gene microarray analysis for Ama-KTT/M/2 versus Canton-S on no toxin (group 2 versus 1)
Gene Symbol	FlyBase ID	Fold Change	p-Value
Ir93a	FBgn0259215	>300	0	1
Map205	FBgn0002645	>300	0	2
Cyp6a2	FBgn0000473	>300	0	3
lectin-24A	FBgn0040104	>300	0	4
Cyp12d1-d	FBgn0053503	280.116	0	5
Cyp12d1-d /// Cyp12d1-p	FBgn0050489 /// FBgn0053503	197.3	0	6
Vkor	FBgn0053544	127.367	0	7
Dbi	FBgn0010387	112.959	0	8
Or22c	FBgn0026396	68.0451	0	9
LysP	FBgn0004429	66.2096	0.00998755	10
smp-30	FBgn0038257	43.3301	0.0423902	11
Ugt36Bb	FBgn0040261	38.8522	0.00345464	12
lcs /// sesB	FBgn0003360 /// FBgn0028583	30.1872	0	13
bic	FBgn0000181	25.1996	0.0011625	14
scw	FBgn0005590	24.5148	0	15
Cpr76Bb	FBgn0036879	16.9997	0.0455833	16
y	FBgn0004034	14.673	0.0447698	17
Muc30E	FBgn0053300	13.0273	0.0350443	18
Cpr67Fa1	FBgn0036108	12.9144	0	19
Ugt86Dd	FBgn0040256	12.4825	0	20
Cpr65Ec	FBgn0035737	11.381	0.0080129	21
Or83a	FBgn0037322	11.109	0	22
GstD5	FBgn0010041	10.0778	0	23
GstE1	FBgn0034335	9.75685	0	24
Muc14A	FBgn0052580	9.37625	0	25
GstE6	FBgn0063494	8.74844	0	26
TBPH	FBgn0025790	8.43452	0	27
vis	FBgn0033748	8.27529	0.0374995	28
Cpr49Ad	FBgn0033726	7.51153	0	29
GstE5	FBgn0063495	7.10084	0	30
Ugt36Bc	FBgn0040260	6.96488	0	31
Elp2	FBgn0033540	5.80485	0.00111406	32
Cpr67Fa1 /// Cpr67Fa2	FBgn0036108 /// FBgn0036109	5.49702	0	33
dpr8	FBgn0052600	5.4629	0	34
Hex-C	FBgn0001187	4.96719	0.00540542	35
Nha1	FBgn0031865	4.74322	0	36
Cpr56F	FBgn0034499	4.73668	0.00590748	37
Cyp6a20	FBgn0033980	4.70526	0.0263893	38
Twdlalpha	FBgn0052574	4.63664	0.00219385	39
TM9SF4	FBgn0028541	4.41596	0	40
inaC	FBgn0004784	4.3181	0	41
phr6-4	FBgn0016054	4.30215	0.0207623	42
Lcp65Ae	FBgn0020640	4.26249	0	43
DLP	FBgn0031820	4.17181	0.0489461	44
PGRP-SC2	FBgn0043575	4.15602	0	45
swa	FBgn0003655	4.14263	0	46
Pdp1	FBgn0016694	4.07384	0.00522922	47
CG4982 /// Idgf4	FBgn0026415 /// FBgn0036598	4.00614	0.00422727	48
Irk2	FBgn0039081	3.98162	0	49
Cpr97Eb	FBgn0039481	3.77378	0.00802125	50
TwdlO	FBgn0039438	3.63038	0	51
dia	FBgn0011202	3.61775	0.00805481	52
Lcp65Af	FBgn0020639	3.5865	0	53
prc	FBgn0028573	3.52554	0	54
Acox57D-d	FBgn0034629	3.44567	0	55
Surf6	FBgn0038746	3.41934	0.0108865	56
PebIII	FBgn0011695	3.36691	0	57
His2A:CG31618 /// His2A:CG33808 /// His2A:CG33814 /// His2A:CG33817 /// His2A:CG33820 /// His2A:CG33823 /// His2A:CG33826 /// His2A:CG33829 /// His2A:CG33832 /// His2A:CG33835 /// His2A:CG33838 /// His2A:CG33841 /// His2A:CG33844 /// His2A:CG33847 /// His2A:CG33850 /// His2A:CG33853 /// His2A:CG33856 /// His2A:CG33859 /// His2A:CG33862 /// His2A:CG33865	FBgn0051618 /// FBgn0053808 /// FBgn0053814 /// FBgn0053817 /// FBgn0053820 /// FBgn0053823 /// FBgn0053826 /// FBgn0053829 /// FBgn0053832 /// FBgn0053835 /// FBgn0053838 /// FBgn0053841 /// FBgn0053844 /// FBgn0053847 /// FBgn0053850 /// FBgn0053853 /// FBgn0053856 /// FBgn0053859 /// FBgn0053862 /// FBgn0053865	3.3219	0.0418979	58
Or45b	FBgn0033422	3.26741	0	59
toy	FBgn0019650	3.26605	0	60
Lcp65Ag2	FBgn0020637	3.24846	0	61
spz3	FBgn0031959	3.142	0.0458357	62
Ser6	FBgn0011834	3.14002	0	63
His2B:CG17949 /// His2B:CG33910	FBgn0053910 /// FBgn0061209	3.13598	0.0090018	64
Obp99d	FBgn0039684	3.05253	0	65
TpnC4	FBgn0033027	3.05111	0	66
to	FBgn0039298	3.05006	0.0340445	67
TwdlF	FBgn0037224	3.04447	0	68
Ddc	FBgn0000422	2.98492	0.011416	69
Kmn1	FBgn0027259	2.98082	0.0336052	70
Cpr49Ag	FBgn0033730	2.93618	0	71
obst-I	FBgn0052304	2.93152	0	72
Eig71Ed	FBgn0004591	2.91889	0	73
Ugt37c1	FBgn0026754	2.91803	0.00200218	74
Cpr49Ae	FBgn0033728	2.90624	0.00581382	75
Clk	FBgn0023076	2.90463	0.014998	76
Ugt36Ba	FBgn0040262	2.89624	0.00348277	77
RpLP0-like	FBgn0033485	2.87381	0.00286473	78
vanin-like	FBgn0040069	2.87273	0	79
tty	FBgn0015558	2.87123	0	80
Cpr31A	FBgn0053302	2.84992	0.00588041	81
hoip /// raps	FBgn0015393 /// FBgn0040080	2.84146	0	82
Fib	FBgn0003062	2.8046	0	83
bys	FBgn0010292	2.79717	0.00530957	84
Nep1	FBgn0029843	2.78701	0.0379929	85
Cyp4c3	FBgn0015032	2.75999	0.0233345	86
SIFR	FBgn0038880	2.74628	0	87
sfl	FBgn0020251	2.73998	0.0335843	88
mod	FBgn0002780	2.73785	0	89
bor	FBgn0040237	2.72814	0	90
bsf	FBgn0032679	2.70415	0.00122696	91
nop5	FBgn0026196	2.6625	0	92
NHP2	FBgn0029148	2.66196	0	93
GV1	FBgn0027790	2.65524	0.0262009	94
Art3	FBgn0038306	2.64812	0.010866	95
pav	FBgn0011692	2.63602	0.0158444	96
Hsp22 /// Hsp67Bb	FBgn0001223 /// FBgn0001228	2.62972	0.0182763	97
spas	FBgn0039141	2.62774	0.0377471	98
RN-tre	FBgn0020620	2.61743	0	99
Sfp53D	FBgn0259967	2.61377	0	100
Cpr67Fa2	FBgn0036109	2.57434	0	101
Nop60B	FBgn0259937	2.56892	0	102
CG31826 /// Ku80	FBgn0041627 /// FBgn0051826	2.56589	0	103
Adk1	FBgn0022709	2.56042	0.00419412	104
Rh50	FBgn0028699	2.55657	0	105
Nopp140	FBgn0037137	2.55618	0	106
Ugt37b1	FBgn0026755	2.55526	0.00352099	107
Est-6	FBgn0000592	2.55517	0.00525984	108
Muc26B	FBgn0040950	2.53782	0	109
Nop56	FBgn0038964	2.53704	0	110
PH4alphaNE1	FBgn0039780	2.53158	0.0142235	111
Eap	FBgn0035063	2.53102	0.03348	112
mbm	FBgn0086912	2.51286	0.0130612	113
mRpL1	FBgn0037566	2.50889	0.00131496	114
ine	FBgn0011603	2.50706	0	115
Dys	FBgn0260003	2.50533	0	116
Ciao1	FBgn0033972	2.50104	0.00415609	117
Eaat1	FBgn0026439	2.50022	0.00527218	118
bond	FBgn0260942	2.4594	0	119
sala	FBgn0003313	2.45365	0	120
RpI135	FBgn0003278	2.44879	0.0204332	121
mRpL15	FBgn0036990	2.44877	0.00347805	122
Ak6	FBgn0033754	2.43638	0.0122284	123
scpr-A /// scpr-B /// scpr-C	FBgn0037879 /// FBgn0037888 /// FBgn0037889	2.43306	0	124
mRpL12	FBgn0011787	2.43204	0	125
mRpS18A	FBgn0051450	2.42549	0	126
mRpL21	FBgn0036853	2.42307	0.0109901	127
Cht4	FBgn0022700	2.41523	0	128
Camta	FBgn0259234	2.41327	0	129
mRpS28	FBgn0034361	2.413	0.004771	130
Tom70	FBgn0032397	2.41288	0.00269245	131
AIF	FBgn0031392	2.40878	0.00122229	132
mRpL20	FBgn0036335	2.40283	0.00118833	133
Obp83g	FBgn0046875	2.39145	0	134
bbx /// pen	FBgn0015527 /// FBgn0024251	2.38946	0.03103	135
Cpr92F	FBgn0038819	2.36682	0.00133967	136
Galpha49B	FBgn0004435	2.3641	0	137
Cyp6w1	FBgn0033065	2.35416	0	138
lectin-21Ca	FBgn0040107	2.34387	0.0146334	139
pit	FBgn0025140	2.33991	0.00411874	140
Obp83cd	FBgn0046878	2.3343	0.00747744	141
eco	FBgn0035766	2.32401	0.0288404	142
mRpL43	FBgn0034893	2.31961	0.00466691	143
pnt	FBgn0003118	2.31641	0	144
Hrb87F	FBgn0004237	2.31574	0	145
Cyp305a1	FBgn0036910	2.31462	0.0146087	146
Scp1	FBgn0020908	2.31289	0	147
mRpS18C	FBgn0039765	2.29304	0.00483693	148
mRpS29	FBgn0034727	2.2895	0.00210393	149
SpdS	FBgn0037723	2.28583	0.00290362	150
CG3841 /// nmo	FBgn0011817 /// FBgn0032131	2.28526	0.0053475	151
bcn92	FBgn0013432	2.28124	0.00358492	152
GC	FBgn0035245	2.27919	0	153
Tsp42Er	FBgn0033139	2.27144	0.00357493	154
ns1	FBgn0038473	2.2692	0.00287328	155
FK506-bp1	FBgn0013269	2.2687	0	156
ppan	FBgn0010770	2.26504	0.0263712	157
scpr-B /// scpr-C	FBgn0037879 /// FBgn0037888	2.26277	0	158
EfTuM	FBgn0024556	2.26268	0	159
mRpL54	FBgn0034579	2.25869	0.00640988	160
CG34316 /// mRpS10	FBgn0038307 /// FBgn0085345	2.25666	0.0020767	161
Mys45A	FBgn0033379	2.25349	0.00424405	162
toy	FBgn0019650	2.2436	0	163
Rs1	FBgn0021995	2.22201	0.020356	164
mRpL40	FBgn0037892	2.22097	0.00350656	165
Csl4	FBgn0032346	2.21876	0.0383274	166
mRpL11	FBgn0038234	2.21798	0.0130727	167
mRpS25	FBgn0030572	2.21321	0.0021901	168
CG32418 /// Myt1	FBgn0040298 /// FBgn0052418	2.21072	0.0181899	169
La	FBgn0011638	2.20539	0	170
mRpL32	FBgn0039835	2.20432	0.00421063	171
Sas10	FBgn0029755	2.20422	0.0185782	172
mRpL13	FBgn0032720	2.19586	0.00121765	173
blp	FBgn0038387	2.19123	0.00285623	174
Gs1	FBgn0001142	2.18833	0	175
tadr	FBgn0032911	2.18399	0	176
mRpL18	FBgn0026741	2.18226	0.00357992	177
Aph-4	FBgn0016123	2.18188	0.00482481	178
nullo	FBgn0004143	2.17461	0	179
Bka	FBgn0010520	2.16725	0.026219	180
mRpL36	FBgn0042112	2.16179	0.00217895	181
Dph5	FBgn0024558	2.15741	0	182
mRpL51	FBgn0032053	2.15502	0.00126319	183
Lcp65Ag3	FBgn0086611	2.14856	0	184
mRpS18B	FBgn0032849	2.145	0.0021679	185
Art8	FBgn0032329	2.14019	0.0149357	186
mRpL24	FBgn0031651	2.1335	0.00198977	187
dtr	FBgn0023090	2.12642	0	188
Tsp74F	FBgn0036769	2.12272	0.0123404	189
mRpS23	FBgn0260407	2.12198	0.0105706	190
Cyp49a1	FBgn0033524	2.12073	0.0306954	191
mRpS14	FBgn0044030	2.11808	0.00275014	192
Nnp-1	FBgn0022069	2.11282	0.00124844	193
RpI1	FBgn0019938	2.09765	0.0130843	194
Ski6	FBgn0032487	2.09189	0.03099	195
128up	FBgn0010339	2.091	0	196
GstD8	FBgn0010044	2.08805	0.0315725	197
RpI12	FBgn0038903	2.08724	0.0327728	198
GstE9	FBgn0063491	2.08064	0	199
Atx-1 /// CG4542	FBgn0029906 /// FBgn0029907	2.07309	0	200
Hsp60	FBgn0015245	2.07112	0	201
mRpS35	FBgn0035374	2.06901	0.002139	202
mRpL38	FBgn0030552	2.06414	0.00465562	203
mRpL19	FBgn0037608	2.05846	0.00215698	204
Cchl	FBgn0038925	2.05769	0	205
Nmd3	FBgn0023542	2.05446	0.00216061	206
eIF6	FBgn0034915	2.05295	0.002852	207
Dak1 /// Sld5	FBgn0028833 /// FBgn0039403	2.04763	0	208
Mec2	FBgn0030993	2.04502	0.00113375	209
mRpL50	FBgn0028648	2.04262	0.00472997	210
Nle	FBgn0021874	2.04139	0.0307153	211
rtet	FBgn0028468	2.04014	0.0395927	212
ns3	FBgn0028274	2.0386	0.0407782	213
mRpL3	FBgn0030686	2.03847	0.0064891	214
Alr	FBgn0031068	2.03842	0.0190059	215
Nap1	FBgn0015268	2.03572	0	216
Tim9a	FBgn0030480	2.02943	0.00212483	217
mRpS34	FBgn0260460	2.02755	0.00592111	218
Tom40	FBgn0016041	2.02362	0	219
mRpL52	FBgn0033208	2.02271	0.00471261	220
pgant4	FBgn0051956	2.02092	0.0218815	221
Picot	FBgn0024315	2.01874	0	222
scf	FBgn0025682	2.01743	0	223
tko	FBgn0003714	2.01708	0	224
mRpS2	FBgn0031639	2.01673	0.00759	225
mwh	FBgn0260963	2.01336	0	226
Cda4	FBgn0052499	2.01102	0	227
djl	FBgn0037463	2.00809	0	228
mRpS26	FBgn0036774	2.00702	0.0108558	229
Egm	FBgn0086712	2.00545	0.0109692	230
mRpS6	FBgn0035534	2.00212	0.00355021	231
mge	FBgn0035473	2.00168	0	232
ECSIT	FBgn0028436	2.00127	0.0210237	233
mRpL17	FBgn0035122	2.00001	0	234

## Sheet: Sheet3
Gene Symbol
312
2012-09-01
2012-09-01
2012-09-02
2012-09-04
2012-09-05
2012-12-01
---
---
---
---
---
---
---
---
---
---
---
---
---
---
---
---
---
---
---
---
---
---
---
---
---
---
---
---
---
---
---
---
---
---
---
---
---
---
---
---
---
---
---
---
---
---
---
---
---
---
---
---
---
---
---
---
---
---
---
---
---
---
---
---
---
---
---
---
---
---
---
---
---
---
---
---
---
---
---
---
---
---
---
---
---
---
---
---
---
---
---
---
---
---
---
---
---
---
---
---
---
---
---
---
---
---
---
---
---
---
---
---
---
---
---
---
---
---
---
---
---
---
---
---
---
---
---
---
---
---
---
---
---
---
---
---
---
---
---
---
---
---
---
---
---
---
---
---
---
---
---
---
---
---
---
---
---
---
---
---
---
---
---
---
---
---
---
---
---
---
---
---
---
---
---
---
---
---
---
---
---
---
---
---
---
---
---
---
---
---
---
---
---
---
---
---
---
---
---
---
---
---
---
---
---
---
---
---
---
---
---
---
---
---
---
---
---
---
---
---
---
---
---
---
---
---
---
---
---
---
---
---
---
---
---
---
---
---
---
---
---
---
---
---
---
---
---
---
---
---
---
---
---
---
---
---
---
---
---
---
---
---
---
---
---
---
---
---
---
---
---
---
---
---
---
---
---
---
---
---
---
---
---
---
---
---
---
---
---
---
---
---
---
---
---
---
---
---
---
---
---
---
---
---
---
---
---
---
---
---
---
---
---
---
---
---
---
---
---
---
---
---
---
---
---
---
---
---
---
---
---
---
---
---
---
---
---
---
---
---
---
---
---
---
---
---
---
---
---
---
---
---
---
---
---
---
---
---
---
---
---
---
---
---
---
---
---
---
---
---
---
---
---
---
---
---
---
---
---
---
---
---
---
---
---
---
---
---
---
---
---
---
---
---
---
---
---
---
---
---
---
---
---
---
---
---
---
---
---
---
---
---
---
---
---
---
---
---
---
---
---
---
---
---
---
---
---
---
---
---
---
---
---
---
---
---
---
---
---
---
---
---
---
---
---
---
---
---
---
---
---
---
---
---
---
---
---
---
---
---
---
---
---
---
---
---
---
---
---
---
---
---
---
---
---
---
---
---
---
---
---
---
---
---
---
---
---
---
---
---
---
---
---
---
---
---
---
---
---
---
---
---
---
---
---
---
---
---
---
---
---
---
---
---
---
---
---
---
---
---
---
---
---
---
---
---
---
---
---
---
---
---
---
---
---
---
---
---
---
---
---
---
---
---
---
---
---
---
---
---
---
---
---
---
---
---
---
---
---
---
---
---
---
---
---
---
---
---
---
---
---
---
---
---
---
---
---
---
---
---
---
---
---
---
---
---
---
---
---
---
---
---
---
---
---
---
---
---
---
---
---
---
---
---
---
---
---
---
---
---
---
---
---
---
---
---
---
---
---
---
---
---
---
---
---
---
---
---
---
---
---
---
---
---
---
---
---
---
---
---
---
---
---
---
---
---
---
---
---
---
---
---
---
---
---
---
---
---
---
---
---
---
---
---
---
---
---
---
---
---
---
---
---
---
---
---
---
---
---
---
---
---
---
---
---
---
---
---
---
---
---
---
---
---
---
---
---
---
---
---
---
---
---
---
---
---
---
---
---
---
---
---
---
---
---
---
---
---
---
---
---
---
---
---
---
---
---
---
---
---
---
---
---
---
---
---
---
---
---
---
---
---
---
---
---
---
---
---
---
---
---
---
---
---
---
---
---
---
---
---
---
---
---
---
---
---
---
---
---
---
---
---
---
---
---
---
---
---
---
---
---
---
---
---
---
---
---
---
---
---
---
---
---
---
---
---
---
---
---
---
---
---
---
---
---
---
---
---
---
---
---
---
---
---
---
---
---
---
---
---
---
---
---
---
---
---
---
---
---
---
---
---
---
---
---
---
---
---
---
---
---
---
---
---
---
---
---
---
---
---
---
---
---
---
---
---
---
---
---
---
---
---
---
---
---
---
---
---
---
---
---
---
---
---
---
---
---
---
---
---
---
---
---
---
---
---
---
---
---
---
---
---
---
---
---
---
---
---
---
---
---
---
---
---
---
---
---
---
---
---
---
---
---
---
---
---
---
---
---
---
---
---
---
---
---
---
---
---
---
---
---
---
---
---
---
---
---
---
---
---
---
---
---
---
---
---
---
---
---
---
---
---
---
---
---
---
---
---
---
---
---
---
---
---
---
---
---
---
---
---
---
---
---
---
---
---
---
---
---
---
---
---
---
---
---
---
---
---
---
---
---
---
---
---
---
---
---
---
---
---
---
---
---
---
---
---
---
---
---
---
---
---
---
---
---
---
---
---
---
---
---
---
---
---
---
---
---
---
---
---
---
---
---
---
---
---
---
---
---
---
---
---
---
---
---
---
---
---
---
---
---
---
---
---
---
---
---
---
---
---
---
---
---
---
---
---
---
---
---
---
---
---
---
---
---
---
---
---
---
---
---
---
---
---
---
---
---
---
---
---
---
---
---
---
---
---
---
---
---
---
---
---
---
---
---
---
---
---
---
---
---
---
---
---
---
---
---
---
---
---
---
---
---
---
---
---
---
---
---
---
---
---
---
---
---
---
---
---
---
---
---
---
---
---
---
---
---
---
---
---
---
---
---
---
---
---
---
---
---
---
---
---
---
---
---
---
---
---
---
---
---
---
---
---
---
---
---
---
---
---
---
---
---
---
---
---
---
---
---
---
---
---
---
---
---
---
---
---
---
---
---
---
---
---
---
---
---
---
---
---
---
---
---
---
---
---
---
---
---
---
---
---
---
---
---
---
---
---
---
---
---
---
---
---
---
---
---
---
---
---
---
---
---
---
---
---
---
---
---
---
---
---
---
---
---
---
---
---
---
---
---
---
---
---
---
---
---
---
---
---
---
---
---
---
---
---
---
---
---
---
---
---
---
---
---
---
---
---
---
---
---
---
---
---
---
---
---
---
---
---
---
---
---
---
---
---
---
---
---
---
---
---
---
---
---
---
---
---
---
---
---
---
---
---
---
---
---
---
---
---
---
---
---
---
---
---
---
---
---
---
---
---
---
---
---
---
---
---
---
---
---
---
---
---
---
---
---
---
---
---
---
---
---
---
---
---
---
---
---
---
---
---
---
---
---
---
---
---
---
---
---
---
---
---
---
---
---
---
---
---
---
---
---
---
---
---
---
---
---
---
---
---
---
---
---
---
---
---
---
---
---
---
---
---
---
---
---
---
---
---
---
---
---
---
---
---
---
---
---
---
---
---
---
---
---
---
---
---
---
---
---
---
---
---
---
---
---
---
---
---
---
---
---
---
---
---
---
---
---
---
---
---
---
---
---
---
---
---
---
---
---
---
---
---
---
---
---
---
---
---
---
---
---
---
---
---
---
---
---
---
---
---
---
---
---
---
---
---
---
---
---
---
---
---
---
---
---
---
---
---
---
---
---
---
---
---
---
---
---
---
---
---
---
---
---
---
---
---
---
---
---
---
---
---
---
---
---
---
---
---
---
---
---
---
---
---
---
---
---
---
---
---
---
---
---
---
---
---
---
---
---
---
---
---
---
---
---
---
---
---
---
---
---
---
---
---
---
---
---
---
---
---
---
---
---
---
---
---
---
---
---
---
---
---
---
---
---
---
---
---
---
---
---
---
---
---
---
---
---
---
---
---
---
---
---
---
---
---
---
---
---
---
---
---
---
---
---
---
---
---
---
---
---
---
---
---
---
---
---
---
---
---
---
---
---
---
---
---
---
---
---
---
---
---
---
---
---
---
---
---
---
---
---
---
---
---
---
---
---
---
---
---
---
---
---
---
---
---
---
---
---
---
---
---
---
---
---
---
---
---
---
---
---
---
---
---
---
---
---
---
---
---
---
---
---
---
---
---
---
---
---
---
---
---
---
---
---
---
---
---
---
---
---
---
---
---
---
---
---
---
---
---
---
---
---
---
---
---
---
---
---
---
---
---
---
---
---
---
---
---
---
---
---
---
---
---
---
---
---
---
---
---
---
---
---
---
---
---
---
---
---
---
---
---
---
---
---
---
---
---
---
---
---
---
---
---
---
---
---
---
---
---
---
---
---
---
---
---
---
---
---
---
---
---
---
---
---
---
---
---
---
---
---
---
---
---
---
---
---
---
---
---
---
---
---
---
---
---
---
---
---
---
---
---
---
---
---
---
---
---
---
---
---
---
---
---
---
---
---
---
---
---
---
---
---
---
---
---
---
---
---
---
---
---
---
---
---
---
---
---
---
---
---
---
---
---
---
---
---
---
---
---
---
---
---
---
---
---
---
---
---
---
---
---
---
---
---
---
---
---
---
---
---
---
---
---
---
---
---
---
---
---
---
---
---
---
---
---
---
---
---
---
---
---
---
---
---
---
---
---
---
---
---
---
---
---
---
---
---
---
---
---
---
---
---
---
---
---
---
---
---
---
---
---
---
---
---
---
---
---
---
---
---
---
---
---
---
---
---
---
---
---
---
---
---
---
---
---
---
---
---
---
---
---
---
---
---
---
---
---
---
---
[truncated: 16,953 more rows]
